# Supplementary material
Source: publisher figshare collection journal article supplement (https://acs.figshare.com/ndownloader/files/5125420)
Supplement: Supplementary file 1 [file 5125420]

=======================================================
AUTHOR INFORMATION
=======================================================

data_global

_publ_contact_author_name   'Professor Daniel L. Reger'
_publ_contact_author_address
;
Department of Chemistry and Biochemistry
University of South Carolina
Columbia, South Carolina 29208
USA
;
_publ_contact_author_phone     '1 803 777 2587'
_publ_contact_author_fax       '1 803 777 9521'
_publ_contact_author_email      reger@mail.chem.sc.edu
_publ_requested_journal        ' Crystal Growth and Design '

loop_
_publ_author_name
_publ_author_address

'Reger, Daniel L.'
;    
Department of Chemistry and Biochemistry
University of South Carolina
Columbia, South Carolina, 29208
USA
;

'Semeniuc, Radu F.'
;    
Department of Chemistry and Biochemistry
University of South Carolina
Columbia, South Carolina, 29208
USA
;

'Smith, Mark D.'
;    
Department of Chemistry and Biochemistry
University of South Carolina
Columbia, South Carolina, 29208
USA
;

=======================================================
CRYSTAL DATA
=======================================================

  
data_cmpd1 
  
_audit_creation_method            SHELXL-97 
_chemical_name_systematic 
; 
 ? 
; 
_chemical_name_common             ? 
_chemical_melting_point           ? 
_chemical_formula_moiety          
 'C13 H13 Bi I3 N5' 
_chemical_formula_sum 
 'C13 H13 Bi I3 N5' 
_chemical_formula_weight          828.96 
  
loop_ 
 _atom_type_symbol 
 _atom_type_description 
 _atom_type_scat_dispersion_real 
 _atom_type_scat_dispersion_imag 
 _atom_type_scat_source 
 'C'  'C'   0.0033   0.0016 
 'International Tables Vol C Tables 4.2.6.8 and 6.1.1.4' 
 'H'  'H'   0.0000   0.0000 
 'International Tables Vol C Tables 4.2.6.8 and 6.1.1.4' 
 'N'  'N'   0.0061   0.0033 
 'International Tables Vol C Tables 4.2.6.8 and 6.1.1.4' 
 'I'  'I'  -0.4742   1.8119 
 'International Tables Vol C Tables 4.2.6.8 and 6.1.1.4' 
 'Bi'  'Bi'  -4.1077  10.2566 
 'International Tables Vol C Tables 4.2.6.8 and 6.1.1.4' 
  
_symmetry_cell_setting            Monoclinic 
_symmetry_space_group_name_H-M    'P 21/n' 
  
loop_ 
 _symmetry_equiv_pos_as_xyz 
 'x, y, z' 
 '-x+1/2, y+1/2, -z+1/2' 
 '-x, -y, -z' 
 'x-1/2, -y-1/2, z-1/2' 
  
_cell_length_a                    11.7982(7) 
_cell_length_b                    12.9290(8) 
_cell_length_c                    12.9381(8) 
_cell_angle_alpha                 90.00 
_cell_angle_beta                  91.4290(10) 
_cell_angle_gamma                 90.00 
_cell_volume                      1972.9(2) 
_cell_formula_units_Z             4 
_cell_measurement_temperature     150(1) 
_cell_measurement_reflns_used     6848 
_cell_measurement_theta_min       2.338 
_cell_measurement_theta_max       26.368 
  
_exptl_crystal_description        block 
_exptl_crystal_colour             orange 
_exptl_crystal_size_max           0.26 
_exptl_crystal_size_mid           0.20 
_exptl_crystal_size_min           0.14 
_exptl_crystal_density_meas       ? 
_exptl_crystal_density_diffrn     2.791 
_exptl_crystal_density_method     'not measured' 
_exptl_crystal_F_000              1472 
_exptl_absorpt_coefficient_mu     13.634 
_exptl_absorpt_correction_type    multi-scan 
_exptl_absorpt_correction_T_min   0.4889 
_exptl_absorpt_correction_T_max   1.0000 
_exptl_absorpt_process_details    '(SADABS, Bruker, 2001)' 
  
_exptl_special_details 
; 
 ? 
; 
  
_diffrn_ambient_temperature       150(1) 
_diffrn_radiation_wavelength      0.71073 
_diffrn_radiation_type            MoK\a 
_diffrn_radiation_source          'fine-focus sealed tube' 
_diffrn_radiation_monochromator   graphite 
_diffrn_measurement_device_type   'Bruker SMART APEX CCD diffractometer' 
_diffrn_measurement_method        'omega scans' 
_diffrn_detector_area_resol_mean  ? 
_diffrn_standards_number          ? 
_diffrn_standards_interval_count  ? 
_diffrn_standards_interval_time   ? 
_diffrn_standards_decay_%         none 
_diffrn_reflns_number             17819 
_diffrn_reflns_av_R_equivalents   0.0276 
_diffrn_reflns_av_sigmaI/netI     0.0230 
_diffrn_reflns_limit_h_min        -14 
_diffrn_reflns_limit_h_max        14 
_diffrn_reflns_limit_k_min        -16 
_diffrn_reflns_limit_k_max        16 
_diffrn_reflns_limit_l_min        -16 
_diffrn_reflns_limit_l_max        16 
_diffrn_reflns_theta_min          2.23 
_diffrn_reflns_theta_max          26.37 
_reflns_number_total              4030 
_reflns_number_gt                 3886 
_reflns_threshold_expression      >2sigma(I) 
  
_computing_data_collection        'SMART NT V5.625 (Bruker, 1998)' 
_computing_cell_refinement        'SAINT+ NT V6.22 (Bruker, 2001)' 
_computing_data_reduction         'SAINT+ NT V6.22' 
_computing_structure_solution     'SHELXS-97 (Sheldrick, 1990)' 
_computing_structure_refinement   'SHELXL-97 (Sheldrick, 1997)' 
_computing_molecular_graphics     'SHELXTL V6.1 (Sheldrick, 2000)' 
_computing_publication_material   'SHELXTL V6.1' 
  
_refine_special_details 
; 
 Refinement of F^2^ against ALL reflections.  The weighted R-factor wR and 
 goodness of fit S are based on F^2^, conventional R-factors R are based 
 on F, with F set to zero for negative F^2^. The threshold expression of 
 F^2^ > 2sigma(F^2^) is used only for calculating R-factors(gt) etc. and is 
 not relevant to the choice of reflections for refinement.  R-factors based 
 on F^2^ are statistically about twice as large as those based on F, and R- 
 factors based on ALL data will be even larger. 
; 
  
_refine_ls_structure_factor_coef  Fsqd 
_refine_ls_matrix_type            full 
_refine_ls_weighting_scheme       calc 
_refine_ls_weighting_details 
 'calc w=1/[\s^2^(Fo^2^)+(0.0156P)^2^+3.5056P] where P=(Fo^2^+2Fc^2^)/3' 
_atom_sites_solution_primary      direct 
_atom_sites_solution_secondary    difmap 
_atom_sites_solution_hydrogens    geom 
_refine_ls_hydrogen_treatment     refU 
_refine_ls_extinction_method      none 
_refine_ls_extinction_coef        ? 
_refine_ls_number_reflns          4030 
_refine_ls_number_parameters      212 
_refine_ls_number_restraints      0 
_refine_ls_R_factor_all           0.0202 
_refine_ls_R_factor_gt            0.0191 
_refine_ls_wR_factor_ref          0.0430 
_refine_ls_wR_factor_gt           0.0427 
_refine_ls_goodness_of_fit_ref    1.090 
_refine_ls_restrained_S_all       1.090 
_refine_ls_shift/su_max           0.001 
_refine_ls_shift/su_mean          0.000 
  
loop_ 
 _atom_site_label 
 _atom_site_type_symbol 
 _atom_site_fract_x 
 _atom_site_fract_y 
 _atom_site_fract_z 
 _atom_site_U_iso_or_equiv 
 _atom_site_adp_type 
 _atom_site_occupancy 
 _atom_site_symmetry_multiplicity 
 _atom_site_calc_flag 
 _atom_site_refinement_flags 
 _atom_site_disorder_assembly 
 _atom_site_disorder_group 
Bi1 Bi 0.579650(12) 0.156710(11) 0.388215(10) 0.01642(5) Uani 1 1 d . . . 
I1 I 0.59614(2) 0.01082(2) 0.21335(2) 0.02692(7) Uani 1 1 d . . . 
I2 I 0.81651(2) 0.21616(2) 0.37714(2) 0.02382(7) Uani 1 1 d . . . 
I3 I 0.65567(2) 0.01628(2) 0.566269(19) 0.02236(7) Uani 1 1 d . . . 
C1 C 0.2996(3) 0.2626(3) 0.3076(3) 0.0217(8) Uani 1 1 d . . . 
C2 C 0.1877(4) 0.2941(4) 0.3106(4) 0.0323(10) Uani 1 1 d . . . 
H2 H 0.1440 0.3024 0.2485 0.028(12) Uiso 1 1 calc R . . 
C3 C 0.1410(4) 0.3130(4) 0.4045(4) 0.0412(12) Uani 1 1 d . . . 
H3 H 0.0643 0.3348 0.4083 0.044(15) Uiso 1 1 calc R . . 
C4 C 0.2064(4) 0.3002(4) 0.4938(4) 0.0352(11) Uani 1 1 d . . . 
H4 H 0.1755 0.3129 0.5597 0.050(16) Uiso 1 1 calc R . . 
C5 C 0.3177(4) 0.2687(3) 0.4852(3) 0.0236(9) Uani 1 1 d . . . 
C6 C 0.3560(3) 0.2394(3) 0.2065(3) 0.0230(9) Uani 1 1 d . . . 
H6A H 0.3800 0.1660 0.2060 0.032(13) Uiso 1 1 calc R . . 
H6B H 0.3005 0.2496 0.1488 0.026(12) Uiso 1 1 calc R . . 
C7 C 0.3937(4) 0.2531(4) 0.5795(3) 0.0292(10) Uani 1 1 d . . . 
H7A H 0.3485 0.2620 0.6423 0.042(14) Uiso 1 1 calc R . . 
H7B H 0.4232 0.1814 0.5795 0.019(11) Uiso 1 1 calc R . . 
C11 C 0.4625(4) 0.3847(3) 0.1242(3) 0.0249(9) Uani 1 1 d . . . 
H11 H 0.4047 0.4089 0.0780 0.013(10) Uiso 1 1 calc R . . 
C12 C 0.5700(4) 0.4244(3) 0.1360(3) 0.0261(9) Uani 1 1 d . . . 
H12 H 0.6022 0.4801 0.0987 0.037(14) Uiso 1 1 calc R . . 
C13 C 0.6214(4) 0.3664(3) 0.2134(3) 0.0224(8) Uani 1 1 d . . . 
H13 H 0.6963 0.3776 0.2395 0.024(11) Uiso 1 1 calc R . . 
C21 C 0.4995(5) 0.4113(4) 0.6405(4) 0.0407(12) Uani 1 1 d . . . 
H21 H 0.4480 0.4350 0.6905 0.057(17) Uiso 1 1 calc R . . 
C22 C 0.5965(5) 0.4585(4) 0.6145(4) 0.0403(12) Uani 1 1 d . . . 
H22 H 0.6269 0.5210 0.6420 0.040(14) Uiso 1 1 calc R . . 
C23 C 0.6425(4) 0.3960(3) 0.5388(4) 0.0328(10) Uani 1 1 d . . . 
H23 H 0.7118 0.4098 0.5056 0.031(13) Uiso 1 1 calc R . . 
N1 N 0.3634(3) 0.2489(2) 0.3932(2) 0.0178(7) Uani 1 1 d . . . 
N11 N 0.5525(3) 0.2930(2) 0.2465(2) 0.0208(7) Uani 1 1 d . . . 
N12 N 0.4545(3) 0.3051(3) 0.1904(2) 0.0197(7) Uani 1 1 d . . . 
N21 N 0.5764(3) 0.3142(3) 0.5189(3) 0.0266(8) Uani 1 1 d . . . 
N22 N 0.4883(3) 0.3247(3) 0.5834(3) 0.0270(8) Uani 1 1 d . . . 
  
loop_ 
 _atom_site_aniso_label 
 _atom_site_aniso_U_11 
 _atom_site_aniso_U_22 
 _atom_site_aniso_U_33 
 _atom_site_aniso_U_23 
 _atom_site_aniso_U_13 
 _atom_site_aniso_U_12 
Bi1 0.01872(8) 0.01339(8) 0.01714(8) 0.00058(5) 0.00016(5) 0.00111(5) 
I1 0.03236(15) 0.02126(14) 0.02728(14) -0.00742(11) 0.00376(11) 0.00156(11) 
I2 0.01921(13) 0.02505(14) 0.02713(14) 0.00630(11) -0.00047(10) -0.00098(10) 
I3 0.02291(13) 0.01977(13) 0.02414(13) 0.00639(10) -0.00463(10) -0.00446(10) 
C1 0.0188(19) 0.0145(19) 0.032(2) 0.0068(16) 0.0002(16) -0.0021(15) 
C2 0.023(2) 0.033(3) 0.041(3) 0.016(2) -0.0017(19) 0.0000(19) 
C3 0.023(2) 0.039(3) 0.062(3) 0.012(3) 0.013(2) 0.010(2) 
C4 0.034(3) 0.030(3) 0.043(3) 0.004(2) 0.019(2) 0.004(2) 
C5 0.031(2) 0.0153(19) 0.025(2) 0.0016(16) 0.0096(17) 0.0003(17) 
C6 0.021(2) 0.025(2) 0.023(2) 0.0030(17) -0.0060(16) -0.0050(17) 
C7 0.040(3) 0.027(2) 0.021(2) -0.0001(17) 0.0110(18) 0.002(2) 
C11 0.032(2) 0.024(2) 0.0187(19) 0.0074(17) -0.0032(16) -0.0007(18) 
C12 0.031(2) 0.021(2) 0.027(2) 0.0053(17) 0.0002(17) -0.0033(18) 
C13 0.024(2) 0.020(2) 0.024(2) -0.0007(16) -0.0005(16) -0.0040(17) 
C21 0.066(4) 0.027(2) 0.030(2) -0.012(2) 0.008(2) -0.002(2) 
C22 0.059(3) 0.021(2) 0.041(3) -0.009(2) -0.005(2) -0.006(2) 
C23 0.038(3) 0.022(2) 0.038(2) -0.0003(19) -0.008(2) -0.0046(19) 
N1 0.0193(16) 0.0128(15) 0.0214(16) -0.0005(13) 0.0010(13) 0.0009(13) 
N11 0.0215(17) 0.0175(17) 0.0232(17) 0.0035(13) -0.0039(13) -0.0007(14) 
N12 0.0193(16) 0.0239(18) 0.0159(15) 0.0010(13) -0.0029(13) 0.0010(14) 
N21 0.030(2) 0.0222(18) 0.0270(18) -0.0030(15) -0.0030(15) 0.0031(15) 
N22 0.040(2) 0.0221(18) 0.0191(17) -0.0035(14) 0.0035(15) 0.0019(16) 
  
_geom_special_details 
; 
 All esds (except the esd in the dihedral angle between two l.s. planes) 
 are estimated using the full covariance matrix.  The cell esds are taken 
 into account individually in the estimation of esds in distances, angles 
 and torsion angles; correlations between esds in cell parameters are only 
 used when they are defined by crystal symmetry.  An approximate (isotropic) 
 treatment of cell esds is used for estimating esds involving l.s. planes. 
; 
  
loop_ 
 _geom_bond_atom_site_label_1 
 _geom_bond_atom_site_label_2 
 _geom_bond_distance 
 _geom_bond_site_symmetry_2 
 _geom_bond_publ_flag 
Bi1 N11 2.557(3) . ? 
Bi1 N21 2.647(4) . ? 
Bi1 N1 2.818(3) . ? 
Bi1 I2 2.9052(3) . ? 
Bi1 I1 2.9556(3) . ? 
Bi1 I3 3.0504(3) . ? 
Bi1 I3 3.6247(3) 3_656 ? 
C1 N1 1.335(5) . ? 
C1 C2 1.383(6) . ? 
C1 C6 1.512(6) . ? 
C2 C3 1.368(7) . ? 
C2 H2 0.9500 . ? 
C3 C4 1.384(7) . ? 
C3 H3 0.9500 . ? 
C4 C5 1.382(6) . ? 
C4 H4 0.9500 . ? 
C5 N1 1.343(5) . ? 
C5 C7 1.509(6) . ? 
C6 N12 1.459(5) . ? 
C6 H6A 0.9900 . ? 
C6 H6B 0.9900 . ? 
C7 N22 1.450(6) . ? 
C7 H7A 0.9900 . ? 
C7 H7B 0.9900 . ? 
C11 N12 1.343(5) . ? 
C11 C12 1.374(6) . ? 
C11 H11 0.9500 . ? 
C12 C13 1.379(6) . ? 
C12 H12 0.9500 . ? 
C13 N11 1.328(5) . ? 
C13 H13 0.9500 . ? 
C21 N22 1.346(6) . ? 
C21 C22 1.346(7) . ? 
C21 H21 0.9500 . ? 
C22 C23 1.390(7) . ? 
C22 H22 0.9500 . ? 
C23 N21 1.336(6) . ? 
C23 H23 0.9500 . ? 
N11 N12 1.358(4) . ? 
N21 N22 1.356(5) . ? 
  
loop_ 
 _geom_angle_atom_site_label_1 
 _geom_angle_atom_site_label_2 
 _geom_angle_atom_site_label_3 
 _geom_angle 
 _geom_angle_site_symmetry_1 
 _geom_angle_site_symmetry_3 
 _geom_angle_publ_flag 
N11 Bi1 N21 85.68(11) . . ? 
N11 Bi1 N1 68.14(10) . . ? 
N21 Bi1 N1 68.46(10) . . ? 
N11 Bi1 I2 83.44(7) . . ? 
N21 Bi1 I2 81.79(8) . . ? 
N1 Bi1 I2 139.62(6) . . ? 
N11 Bi1 I1 84.29(7) . . ? 
N21 Bi1 I1 169.10(8) . . ? 
N1 Bi1 I1 111.36(6) . . ? 
I2 Bi1 I1 92.828(9) . . ? 
N11 Bi1 I3 168.75(7) . . ? 
N21 Bi1 I3 89.07(8) . . ? 
N1 Bi1 I3 118.93(6) . . ? 
I2 Bi1 I3 85.967(8) . . ? 
I1 Bi1 I3 100.050(10) . . ? 
N11 Bi1 I3 117.31(7) . 3_656 ? 
N21 Bi1 I3 110.33(8) . 3_656 ? 
N1 Bi1 I3 63.87(6) . 3_656 ? 
I2 Bi1 I3 155.901(8) . 3_656 ? 
I1 Bi1 I3 78.222(8) . 3_656 ? 
I3 Bi1 I3 73.859(8) . 3_656 ? 
N1 C1 C2 122.3(4) . . ? 
N1 C1 C6 116.1(3) . . ? 
C2 C1 C6 121.6(4) . . ? 
C3 C2 C1 118.9(4) . . ? 
C3 C2 H2 120.5 . . ? 
C1 C2 H2 120.5 . . ? 
C2 C3 C4 119.4(4) . . ? 
C2 C3 H3 120.3 . . ? 
C4 C3 H3 120.3 . . ? 
C5 C4 C3 118.6(4) . . ? 
C5 C4 H4 120.7 . . ? 
C3 C4 H4 120.7 . . ? 
N1 C5 C4 122.0(4) . . ? 
N1 C5 C7 116.6(4) . . ? 
C4 C5 C7 121.4(4) . . ? 
N12 C6 C1 112.2(3) . . ? 
N12 C6 H6A 109.2 . . ? 
C1 C6 H6A 109.2 . . ? 
N12 C6 H6B 109.2 . . ? 
C1 C6 H6B 109.2 . . ? 
H6A C6 H6B 107.9 . . ? 
N22 C7 C5 112.6(3) . . ? 
N22 C7 H7A 109.1 . . ? 
C5 C7 H7A 109.1 . . ? 
N22 C7 H7B 109.1 . . ? 
C5 C7 H7B 109.1 . . ? 
H7A C7 H7B 107.8 . . ? 
N12 C11 C12 107.2(4) . . ? 
N12 C11 H11 126.4 . . ? 
C12 C11 H11 126.4 . . ? 
C11 C12 C13 105.3(4) . . ? 
C11 C12 H12 127.3 . . ? 
C13 C12 H12 127.3 . . ? 
N11 C13 C12 111.3(4) . . ? 
N11 C13 H13 124.4 . . ? 
C12 C13 H13 124.4 . . ? 
N22 C21 C22 108.2(4) . . ? 
N22 C21 H21 125.9 . . ? 
C22 C21 H21 125.9 . . ? 
C21 C22 C23 105.2(4) . . ? 
C21 C22 H22 127.4 . . ? 
C23 C22 H22 127.4 . . ? 
N21 C23 C22 111.0(4) . . ? 
N21 C23 H23 124.5 . . ? 
C22 C23 H23 124.5 . . ? 
C1 N1 C5 118.7(3) . . ? 
C1 N1 Bi1 121.9(3) . . ? 
C5 N1 Bi1 119.0(3) . . ? 
C13 N11 N12 105.3(3) . . ? 
C13 N11 Bi1 131.1(3) . . ? 
N12 N11 Bi1 123.5(2) . . ? 
C11 N12 N11 110.9(3) . . ? 
C11 N12 C6 127.3(3) . . ? 
N11 N12 C6 121.8(3) . . ? 
C23 N21 N22 104.8(4) . . ? 
C23 N21 Bi1 135.6(3) . . ? 
N22 N21 Bi1 119.6(3) . . ? 
C21 N22 N21 110.8(4) . . ? 
C21 N22 C7 128.0(4) . . ? 
N21 N22 C7 121.1(3) . . ? 
  
loop_ 
 _geom_torsion_atom_site_label_1 
 _geom_torsion_atom_site_label_2 
 _geom_torsion_atom_site_label_3 
 _geom_torsion_atom_site_label_4 
 _geom_torsion 
 _geom_torsion_site_symmetry_1 
 _geom_torsion_site_symmetry_2 
 _geom_torsion_site_symmetry_3 
 _geom_torsion_site_symmetry_4 
 _geom_torsion_publ_flag 
N1 C1 C2 C3 0.8(7) . . . . ? 
C6 C1 C2 C3 179.4(4) . . . . ? 
C1 C2 C3 C4 -0.1(7) . . . . ? 
C2 C3 C4 C5 0.1(7) . . . . ? 
C3 C4 C5 N1 -0.9(7) . . . . ? 
C3 C4 C5 C7 -179.9(4) . . . . ? 
N1 C1 C6 N12 -60.9(5) . . . . ? 
C2 C1 C6 N12 120.4(4) . . . . ? 
N1 C5 C7 N22 65.3(5) . . . . ? 
C4 C5 C7 N22 -115.6(4) . . . . ? 
N12 C11 C12 C13 -1.7(5) . . . . ? 
C11 C12 C13 N11 1.6(5) . . . . ? 
N22 C21 C22 C23 0.2(6) . . . . ? 
C21 C22 C23 N21 0.2(6) . . . . ? 
C2 C1 N1 C5 -1.6(6) . . . . ? 
C6 C1 N1 C5 179.8(3) . . . . ? 
C2 C1 N1 Bi1 170.7(3) . . . . ? 
C6 C1 N1 Bi1 -8.0(4) . . . . ? 
C4 C5 N1 C1 1.6(6) . . . . ? 
C7 C5 N1 C1 -179.3(4) . . . . ? 
C4 C5 N1 Bi1 -170.9(3) . . . . ? 
C7 C5 N1 Bi1 8.2(5) . . . . ? 
N11 Bi1 N1 C1 46.0(3) . . . . ? 
N21 Bi1 N1 C1 140.0(3) . . . . ? 
I2 Bi1 N1 C1 94.6(3) . . . . ? 
I1 Bi1 N1 C1 -28.2(3) . . . . ? 
I3 Bi1 N1 C1 -143.7(3) . . . . ? 
I3 Bi1 N1 C1 -92.4(3) 3_656 . . . ? 
N11 Bi1 N1 C5 -141.8(3) . . . . ? 
N21 Bi1 N1 C5 -47.7(3) . . . . ? 
I2 Bi1 N1 C5 -93.2(3) . . . . ? 
I1 Bi1 N1 C5 144.0(3) . . . . ? 
I3 Bi1 N1 C5 28.5(3) . . . . ? 
I3 Bi1 N1 C5 79.8(3) 3_656 . . . ? 
C12 C13 N11 N12 -0.9(5) . . . . ? 
C12 C13 N11 Bi1 -178.6(3) . . . . ? 
N21 Bi1 N11 C13 68.5(4) . . . . ? 
N1 Bi1 N11 C13 137.0(4) . . . . ? 
I2 Bi1 N11 C13 -13.7(3) . . . . ? 
I1 Bi1 N11 C13 -107.2(4) . . . . ? 
I3 Bi1 N11 C13 6.1(7) . . . . ? 
I3 Bi1 N11 C13 179.2(3) 3_656 . . . ? 
N21 Bi1 N11 N12 -108.9(3) . . . . ? 
N1 Bi1 N11 N12 -40.4(3) . . . . ? 
I2 Bi1 N11 N12 168.9(3) . . . . ? 
I1 Bi1 N11 N12 75.4(3) . . . . ? 
I3 Bi1 N11 N12 -171.3(2) . . . . ? 
I3 Bi1 N11 N12 1.8(3) 3_656 . . . ? 
C12 C11 N12 N11 1.3(5) . . . . ? 
C12 C11 N12 C6 179.4(4) . . . . ? 
C13 N11 N12 C11 -0.3(4) . . . . ? 
Bi1 N11 N12 C11 177.7(3) . . . . ? 
C13 N11 N12 C6 -178.5(4) . . . . ? 
Bi1 N11 N12 C6 -0.5(5) . . . . ? 
C1 C6 N12 C11 -106.5(4) . . . . ? 
C1 C6 N12 N11 71.4(5) . . . . ? 
C22 C23 N21 N22 -0.5(5) . . . . ? 
C22 C23 N21 Bi1 177.0(3) . . . . ? 
N11 Bi1 N21 C23 -65.2(4) . . . . ? 
N1 Bi1 N21 C23 -133.4(4) . . . . ? 
I2 Bi1 N21 C23 18.7(4) . . . . ? 
I1 Bi1 N21 C23 -42.2(7) . . . . ? 
I3 Bi1 N21 C23 104.8(4) . . . . ? 
I3 Bi1 N21 C23 177.2(4) 3_656 . . . ? 
N11 Bi1 N21 N22 112.0(3) . . . . ? 
N1 Bi1 N21 N22 43.8(3) . . . . ? 
I2 Bi1 N21 N22 -164.0(3) . . . . ? 
I1 Bi1 N21 N22 135.0(4) . . . . ? 
I3 Bi1 N21 N22 -78.0(3) . . . . ? 
I3 Bi1 N21 N22 -5.6(3) 3_656 . . . ? 
C22 C21 N22 N21 -0.5(6) . . . . ? 
C22 C21 N22 C7 -175.3(4) . . . . ? 
C23 N21 N22 C21 0.6(5) . . . . ? 
Bi1 N21 N22 C21 -177.4(3) . . . . ? 
C23 N21 N22 C7 175.8(4) . . . . ? 
Bi1 N21 N22 C7 -2.2(5) . . . . ? 
C5 C7 N22 C21 101.4(5) . . . . ? 
C5 C7 N22 N21 -72.8(5) . . . . ? 
  
_diffrn_measured_fraction_theta_max    0.999 
_diffrn_reflns_theta_full              26.37 
_diffrn_measured_fraction_theta_full   0.999 
_refine_diff_density_max    0.564 
_refine_diff_density_min   -0.966 
_refine_diff_density_rms    0.129 

#===END

data_cmpd2 
  
_audit_creation_method            SHELXL-97 
_chemical_name_systematic 
; 
 ? 
; 
_chemical_name_common             ? 
_chemical_melting_point           ? 
_chemical_formula_moiety          
 'C13 H13 Ag N5, C F3 O3 S, C2 H3 N'
_chemical_formula_sum 
 'C16 H16 Ag F3 N6 O3 S' 
_chemical_formula_weight          537.28 
  
loop_ 
 _atom_type_symbol 
 _atom_type_description 
 _atom_type_scat_dispersion_real 
 _atom_type_scat_dispersion_imag 
 _atom_type_scat_source 
 'C'  'C'   0.0033   0.0016 
 'International Tables Vol C Tables 4.2.6.8 and 6.1.1.4' 
 'H'  'H'   0.0000   0.0000 
 'International Tables Vol C Tables 4.2.6.8 and 6.1.1.4' 
 'N'  'N'   0.0061   0.0033 
 'International Tables Vol C Tables 4.2.6.8 and 6.1.1.4' 
 'O'  'O'   0.0106   0.0060 
 'International Tables Vol C Tables 4.2.6.8 and 6.1.1.4' 
 'F'  'F'   0.0171   0.0103 
 'International Tables Vol C Tables 4.2.6.8 and 6.1.1.4' 
 'S'  'S'   0.1246   0.1234 
 'International Tables Vol C Tables 4.2.6.8 and 6.1.1.4' 
 'Ag'  'Ag'  -0.8971   1.1015 
 'International Tables Vol C Tables 4.2.6.8 and 6.1.1.4' 
  
_symmetry_cell_setting            Monoclinic 
_symmetry_space_group_name_H-M    'P 21/c' 
  
loop_ 
 _symmetry_equiv_pos_as_xyz 
 'x, y, z' 
 '-x, y+1/2, -z+1/2' 
 '-x, -y, -z' 
 'x, -y-1/2, z-1/2' 
  
_cell_length_a                    13.6491(9) 
_cell_length_b                    13.3388(9) 
_cell_length_c                    11.2567(7) 
_cell_angle_alpha                 90.00 
_cell_angle_beta                  95.9400(10) 
_cell_angle_gamma                 90.00 
_cell_volume                      2038.4(2) 
_cell_formula_units_Z             4 
_cell_measurement_temperature     150(1) 
_cell_measurement_reflns_used     5912 
_cell_measurement_theta_min       2.375 
_cell_measurement_theta_max       26.357 
  
_exptl_crystal_description        plate 
_exptl_crystal_colour             colorless 
_exptl_crystal_size_max           0.45 
_exptl_crystal_size_mid           0.24 
_exptl_crystal_size_min           0.08 
_exptl_crystal_density_meas       ? 
_exptl_crystal_density_diffrn     1.751 
_exptl_crystal_density_method     'not measured' 
_exptl_crystal_F_000              1072 
_exptl_absorpt_coefficient_mu     1.149 
_exptl_absorpt_correction_type    multi-scan 
_exptl_absorpt_correction_T_min   0.8050 
_exptl_absorpt_correction_T_max   1.0000 
_exptl_absorpt_process_details    '(SADABS, Bruker, 2001)' 
  
_exptl_special_details 
; 
 ? 
; 
  
_diffrn_ambient_temperature       150(1) 
_diffrn_radiation_wavelength      0.71073 
_diffrn_radiation_type            MoK\a 
_diffrn_radiation_source          'fine-focus sealed tube' 
_diffrn_radiation_monochromator   graphite 
_diffrn_measurement_device_type   'Bruker SMART APEX CCD diffractometer' 
_diffrn_measurement_method        'omega scans' 
_diffrn_detector_area_resol_mean  ? 
_diffrn_standards_number          ? 
_diffrn_standards_interval_count  ? 
_diffrn_standards_interval_time   ? 
_diffrn_standards_decay_%         none 
_diffrn_reflns_number             18429 
_diffrn_reflns_av_R_equivalents   0.0258 
_diffrn_reflns_av_sigmaI/netI     0.0235 
_diffrn_reflns_limit_h_min        -17 
_diffrn_reflns_limit_h_max        17 
_diffrn_reflns_limit_k_min        -16 
_diffrn_reflns_limit_k_max        16 
_diffrn_reflns_limit_l_min        -14 
_diffrn_reflns_limit_l_max        14 
_diffrn_reflns_theta_min          1.50 
_diffrn_reflns_theta_max          26.40 
_reflns_number_total              4164 
_reflns_number_gt                 3823 
_reflns_threshold_expression      >2sigma(I) 
  
_computing_data_collection        'SMART NT V5.625 (Bruker, 1998)' 
_computing_cell_refinement        'SAINT+ NT V6.22 (Bruker, 2001)' 
_computing_data_reduction         'SAINT+ NT V6.22' 
_computing_structure_solution     'SHELXS-97 (Sheldrick, 1990)' 
_computing_structure_refinement   'SHELXL-97 (Sheldrick, 1997)' 
_computing_molecular_graphics     'SHELXTL V6.1 (Sheldrick, 2000)' 
_computing_publication_material   'SHELXTL V6.1' 
  
_refine_special_details 
; 
 Refinement of F^2^ against ALL reflections.  The weighted R-factor wR and 
 goodness of fit S are based on F^2^, conventional R-factors R are based 
 on F, with F set to zero for negative F^2^. The threshold expression of 
 F^2^ > 2sigma(F^2^) is used only for calculating R-factors(gt) etc. and is 
 not relevant to the choice of reflections for refinement.  R-factors based 
 on F^2^ are statistically about twice as large as those based on F, and R- 
 factors based on ALL data will be even larger. 
; 
  
_refine_ls_structure_factor_coef  Fsqd 
_refine_ls_matrix_type            full 
_refine_ls_weighting_scheme       calc 
_refine_ls_weighting_details 
 'calc w=1/[\s^2^(Fo^2^)+(0.0465P)^2^+2.2032P] where P=(Fo^2^+2Fc^2^)/3' 
_atom_sites_solution_primary      direct 
_atom_sites_solution_secondary    difmap 
_atom_sites_solution_hydrogens    geom 
_refine_ls_hydrogen_treatment     mixed 
_refine_ls_extinction_method      none 
_refine_ls_extinction_coef        ? 
_refine_ls_number_reflns          4164 
_refine_ls_number_parameters      285 
_refine_ls_number_restraints      0 
_refine_ls_R_factor_all           0.0390 
_refine_ls_R_factor_gt            0.0356 
_refine_ls_wR_factor_ref          0.0894 
_refine_ls_wR_factor_gt           0.0872 
_refine_ls_goodness_of_fit_ref    1.063 
_refine_ls_restrained_S_all       1.063 
_refine_ls_shift/su_max           0.001 
_refine_ls_shift/su_mean          0.000 
  
loop_ 
 _atom_site_label 
 _atom_site_type_symbol 
 _atom_site_fract_x 
 _atom_site_fract_y 
 _atom_site_fract_z 
 _atom_site_U_iso_or_equiv 
 _atom_site_adp_type 
 _atom_site_occupancy 
 _atom_site_symmetry_multiplicity 
 _atom_site_calc_flag 
 _atom_site_refinement_flags 
 _atom_site_disorder_assembly 
 _atom_site_disorder_group 
Ag1 Ag 0.382349(16) 0.732785(18) 0.676725(19) 0.03463(10) Uani 1 1 d . . . 
C1 C 0.5618(2) 0.6718(2) 0.5322(2) 0.0295(6) Uani 1 1 d . . . 
C2 C 0.6139(2) 0.6150(2) 0.4572(2) 0.0317(6) Uani 1 1 d . . . 
H2 H 0.6837 0.6106 0.4701 0.035(8) Uiso 1 1 calc R . . 
C3 C 0.5620(2) 0.5648(2) 0.3628(2) 0.0322(6) Uani 1 1 d . . . 
H3 H 0.5958 0.5241 0.3111 0.039(9) Uiso 1 1 calc R . . 
C4 C 0.4608(2) 0.5743(2) 0.3445(2) 0.0296(6) Uani 1 1 d . . . 
H4 H 0.4241 0.5407 0.2801 0.032(8) Uiso 1 1 calc R . . 
C5 C 0.4140(2) 0.6342(2) 0.4224(2) 0.0278(5) Uani 1 1 d . . . 
C6 C 0.6130(2) 0.7273(2) 0.6379(3) 0.0350(6) Uani 1 1 d . . . 
H6A H 0.6837 0.7346 0.6270 0.041(9) Uiso 1 1 calc R . . 
H6B H 0.5845 0.7953 0.6414 0.033(8) Uiso 1 1 calc R . . 
C7 C 0.3045(2) 0.6542(2) 0.4111(2) 0.0353(6) Uani 1 1 d . . . 
H7A H 0.2765 0.6223 0.4794 0.042(9) Uiso 1 1 calc R . . 
H7B H 0.2940 0.7274 0.4172 0.038(9) Uiso 1 1 calc R . . 
C11 C 0.6742(2) 0.6316(2) 0.8252(3) 0.0389(7) Uani 1 1 d . . . 
H11 H 0.7427 0.6308 0.8166 0.058(11) Uiso 1 1 calc R . . 
C12 C 0.6296(2) 0.5886(2) 0.9155(3) 0.0421(7) Uani 1 1 d . . . 
H12 H 0.6601 0.5521 0.9818 0.046(10) Uiso 1 1 calc R . . 
C13 C 0.5295(2) 0.6097(2) 0.8894(2) 0.0353(6) Uani 1 1 d . . . 
H13 H 0.4795 0.5891 0.9369 0.038(9) Uiso 1 1 calc R . . 
C21 C 0.1749(2) 0.5543(2) 0.2899(3) 0.0437(7) Uani 1 1 d . . . 
H21 H 0.1491 0.5181 0.3524 0.052(10) Uiso 1 1 calc R . . 
C22 C 0.1416(2) 0.5500(3) 0.1709(3) 0.0486(8) Uani 1 1 d . . . 
H22 H 0.0887 0.5109 0.1342 0.055(11) Uiso 1 1 calc R . . 
C23 C 0.2017(2) 0.6148(2) 0.1160(3) 0.0380(7) Uani 1 1 d . . . 
H23 H 0.1964 0.6269 0.0324 0.038(9) Uiso 1 1 calc R . . 
N1 N 0.46326(17) 0.68050(17) 0.51550(19) 0.0290(5) Uani 1 1 d . . . 
N11 N 0.51349(18) 0.66282(18) 0.7883(2) 0.0315(5) Uani 1 1 d . . . 
N12 N 0.60351(18) 0.67529(18) 0.7507(2) 0.0326(5) Uani 1 1 d . . . 
N21 N 0.26765(17) 0.65806(18) 0.1945(2) 0.0316(5) Uani 1 1 d . . . 
N22 N 0.25047(17) 0.61891(19) 0.3021(2) 0.0330(5) Uani 1 1 d . . . 
S1 S 0.20249(6) 0.57795(6) 0.76677(7) 0.0427(2) Uani 1 1 d . . . 
O1 O 0.2182(3) 0.5844(2) 0.6443(3) 0.0763(9) Uani 1 1 d . . . 
O2 O 0.2927(2) 0.5750(3) 0.8436(3) 0.0739(9) Uani 1 1 d . . . 
O3 O 0.1285(2) 0.6419(2) 0.8067(2) 0.0624(7) Uani 1 1 d . . . 
C31 C 0.1534(3) 0.4530(3) 0.7796(3) 0.0488(8) Uani 1 1 d . . . 
F1 F 0.1364(2) 0.4348(2) 0.8918(2) 0.0846(8) Uani 1 1 d . . . 
F2 F 0.07008(18) 0.4412(3) 0.7127(3) 0.0979(10) Uani 1 1 d . . . 
F3 F 0.21559(19) 0.38396(17) 0.7473(3) 0.0740(7) Uani 1 1 d . . . 
N41 N 0.1465(3) 0.3281(3) 0.4075(5) 0.0893(14) Uani 1 1 d . . . 
C41 C 0.0765(3) 0.3071(3) 0.4443(4) 0.0633(11) Uani 1 1 d . . . 
C42 C -0.0133(4) 0.2797(5) 0.4918(6) 0.0943(19) Uani 1 1 d . . . 
H42A H -0.0598 0.3359 0.4826 0.142 Uiso 1 1 calc R . . 
H42B H 0.0006 0.2632 0.5768 0.142 Uiso 1 1 calc R . . 
H42C H -0.0422 0.2213 0.4486 0.142 Uiso 1 1 calc R . . 
  
loop_ 
 _atom_site_aniso_label 
 _atom_site_aniso_U_11 
 _atom_site_aniso_U_22 
 _atom_site_aniso_U_33 
 _atom_site_aniso_U_23 
 _atom_site_aniso_U_13 
 _atom_site_aniso_U_12 
Ag1 0.03745(14) 0.03597(15) 0.03138(14) -0.00466(9) 0.00790(9) 0.00683(9) 
C1 0.0357(14) 0.0269(13) 0.0266(13) 0.0021(11) 0.0062(11) -0.0020(11) 
C2 0.0307(14) 0.0320(14) 0.0335(14) 0.0017(11) 0.0078(11) 0.0004(11) 
C3 0.0401(16) 0.0289(14) 0.0290(14) 0.0002(11) 0.0099(12) 0.0042(12) 
C4 0.0379(15) 0.0264(13) 0.0251(13) 0.0008(10) 0.0065(11) -0.0001(11) 
C5 0.0344(14) 0.0266(13) 0.0229(12) 0.0048(10) 0.0063(10) 0.0012(11) 
C6 0.0383(16) 0.0341(15) 0.0329(15) -0.0021(12) 0.0057(12) -0.0027(12) 
C7 0.0382(16) 0.0453(17) 0.0234(13) 0.0020(12) 0.0074(11) 0.0062(13) 
C11 0.0380(16) 0.0400(16) 0.0368(16) -0.0101(13) -0.0054(12) 0.0071(13) 
C12 0.0530(19) 0.0382(17) 0.0326(16) -0.0051(13) -0.0075(14) 0.0124(14) 
C13 0.0470(17) 0.0340(15) 0.0248(13) -0.0034(11) 0.0040(12) 0.0058(13) 
C21 0.0347(16) 0.0390(17) 0.060(2) 0.0045(15) 0.0149(15) -0.0024(13) 
C22 0.0317(16) 0.0449(19) 0.068(2) -0.0114(17) 0.0004(15) -0.0035(14) 
C23 0.0324(15) 0.0452(18) 0.0357(16) -0.0066(13) -0.0007(12) 0.0043(13) 
N1 0.0376(12) 0.0251(11) 0.0252(11) 0.0015(9) 0.0069(9) 0.0018(9) 
N11 0.0387(13) 0.0303(12) 0.0257(11) -0.0031(9) 0.0045(10) 0.0014(10) 
N12 0.0365(13) 0.0321(13) 0.0289(12) -0.0063(10) 0.0024(10) -0.0001(10) 
N21 0.0330(12) 0.0353(13) 0.0266(11) 0.0003(10) 0.0043(9) 0.0001(10) 
N22 0.0325(12) 0.0360(13) 0.0317(12) 0.0042(10) 0.0081(10) 0.0015(10) 
S1 0.0493(5) 0.0426(4) 0.0394(4) 0.0030(3) 0.0187(3) 0.0006(3) 
O1 0.123(3) 0.0622(18) 0.0519(16) 0.0127(13) 0.0471(17) 0.0124(17) 
O2 0.0458(15) 0.081(2) 0.093(2) -0.0194(18) 0.0004(14) -0.0146(14) 
O3 0.0746(18) 0.0624(18) 0.0533(15) 0.0014(12) 0.0216(13) 0.0222(14) 
C31 0.0423(18) 0.056(2) 0.050(2) -0.0038(16) 0.0177(15) -0.0109(16) 
F1 0.124(2) 0.0699(17) 0.0678(16) 0.0104(13) 0.0481(16) -0.0252(16) 
F2 0.0482(14) 0.132(3) 0.113(2) -0.053(2) 0.0054(14) -0.0304(15) 
F3 0.0805(17) 0.0446(12) 0.1027(19) 0.0004(12) 0.0379(14) 0.0015(11) 
N41 0.056(2) 0.071(3) 0.146(4) 0.013(3) 0.034(2) -0.0039(19) 
C41 0.049(2) 0.044(2) 0.097(3) -0.004(2) 0.010(2) -0.0082(17) 
C42 0.064(3) 0.118(5) 0.106(4) -0.026(3) 0.030(3) -0.034(3) 
  
_geom_special_details 
; 
 All esds (except the esd in the dihedral angle between two l.s. planes) 
 are estimated using the full covariance matrix.  The cell esds are taken 
 into account individually in the estimation of esds in distances, angles 
 and torsion angles; correlations between esds in cell parameters are only 
 used when they are defined by crystal symmetry.  An approximate (isotropic) 
 treatment of cell esds is used for estimating esds involving l.s. planes. 
; 
  
loop_ 
 _geom_bond_atom_site_label_1 
 _geom_bond_atom_site_label_2 
 _geom_bond_distance 
 _geom_bond_site_symmetry_2 
 _geom_bond_publ_flag 
Ag1 N21 2.162(2) 4_576 ? 
Ag1 N11 2.278(2) . ? 
Ag1 N1 2.327(2) . ? 
Ag1 O1 2.983(4) . ? 
Ag1 O2 3.152(3) . ? 
Ag1 O3 4.082(3) . ? 
C1 N1 1.343(4) . ? 
C1 C2 1.384(4) . ? 
C1 C6 1.511(4) . ? 
C2 C3 1.388(4) . ? 
C2 H2 0.9500 . ? 
C3 C4 1.380(4) . ? 
C3 H3 0.9500 . ? 
C4 C5 1.390(4) . ? 
C4 H4 0.9500 . ? 
C5 N1 1.336(4) . ? 
C5 C7 1.511(4) . ? 
C6 N12 1.464(4) . ? 
C6 H6A 0.9900 . ? 
C6 H6B 0.9900 . ? 
C7 N22 1.444(4) . ? 
C7 H7A 0.9900 . ? 
C7 H7B 0.9900 . ? 
C11 N12 1.344(4) . ? 
C11 C12 1.364(5) . ? 
C11 H11 0.9500 . ? 
C12 C13 1.396(4) . ? 
C12 H12 0.9500 . ? 
C13 N11 1.339(4) . ? 
C13 H13 0.9500 . ? 
C21 N22 1.340(4) . ? 
C21 C22 1.371(5) . ? 
C21 H21 0.9500 . ? 
C22 C23 1.380(5) . ? 
C22 H22 0.9500 . ? 
C23 N21 1.327(4) . ? 
C23 H23 0.9500 . ? 
N11 N12 1.351(3) . ? 
N21 N22 1.361(3) . ? 
N21 Ag1 2.162(2) 4_575 ? 
S1 O1 1.419(3) . ? 
S1 O3 1.429(3) . ? 
S1 O2 1.430(3) . ? 
S1 C31 1.808(4) . ? 
C31 F2 1.306(4) . ? 
C31 F3 1.329(4) . ? 
C31 F1 1.330(4) . ? 
N41 C41 1.116(5) . ? 
C41 C42 1.435(6) . ? 
C42 H42A 0.9800 . ? 
C42 H42B 0.9800 . ? 
C42 H42C 0.9800 . ? 
  
loop_ 
 _geom_angle_atom_site_label_1 
 _geom_angle_atom_site_label_2 
 _geom_angle_atom_site_label_3 
 _geom_angle 
 _geom_angle_site_symmetry_1 
 _geom_angle_site_symmetry_3 
 _geom_angle_publ_flag 
N21 Ag1 N11 139.47(8) 4_576 . ? 
N21 Ag1 N1 132.89(8) 4_576 . ? 
N11 Ag1 N1 84.15(8) . . ? 
N21 Ag1 O1 85.19(9) 4_576 . ? 
N11 Ag1 O1 109.45(9) . . ? 
N1 Ag1 O1 96.71(8) . . ? 
N21 Ag1 O2 93.72(9) 4_576 . ? 
N11 Ag1 O2 74.28(8) . . ? 
N1 Ag1 O2 120.65(8) . . ? 
O1 Ag1 O2 45.32(8) . . ? 
N21 Ag1 O3 61.15(8) 4_576 . ? 
N11 Ag1 O3 109.16(7) . . ? 
N1 Ag1 O3 132.80(7) . . ? 
O1 Ag1 O3 36.13(7) . . ? 
O2 Ag1 O3 36.05(7) . . ? 
N1 C1 C2 122.2(3) . . ? 
N1 C1 C6 116.3(2) . . ? 
C2 C1 C6 121.5(3) . . ? 
C1 C2 C3 118.5(3) . . ? 
C1 C2 H2 120.8 . . ? 
C3 C2 H2 120.8 . . ? 
C4 C3 C2 119.6(3) . . ? 
C4 C3 H3 120.2 . . ? 
C2 C3 H3 120.2 . . ? 
C3 C4 C5 118.5(3) . . ? 
C3 C4 H4 120.7 . . ? 
C5 C4 H4 120.7 . . ? 
N1 C5 C4 122.2(3) . . ? 
N1 C5 C7 113.4(2) . . ? 
C4 C5 C7 124.3(3) . . ? 
N12 C6 C1 112.0(2) . . ? 
N12 C6 H6A 109.2 . . ? 
C1 C6 H6A 109.2 . . ? 
N12 C6 H6B 109.2 . . ? 
C1 C6 H6B 109.2 . . ? 
H6A C6 H6B 107.9 . . ? 
N22 C7 C5 115.3(2) . . ? 
N22 C7 H7A 108.4 . . ? 
C5 C7 H7A 108.4 . . ? 
N22 C7 H7B 108.4 . . ? 
C5 C7 H7B 108.4 . . ? 
H7A C7 H7B 107.5 . . ? 
N12 C11 C12 107.5(3) . . ? 
N12 C11 H11 126.2 . . ? 
C12 C11 H11 126.2 . . ? 
C11 C12 C13 105.1(3) . . ? 
C11 C12 H12 127.5 . . ? 
C13 C12 H12 127.5 . . ? 
N11 C13 C12 110.8(3) . . ? 
N11 C13 H13 124.6 . . ? 
C12 C13 H13 124.6 . . ? 
N22 C21 C22 107.5(3) . . ? 
N22 C21 H21 126.3 . . ? 
C22 C21 H21 126.3 . . ? 
C21 C22 C23 105.0(3) . . ? 
C21 C22 H22 127.5 . . ? 
C23 C22 H22 127.5 . . ? 
N21 C23 C22 111.6(3) . . ? 
N21 C23 H23 124.2 . . ? 
C22 C23 H23 124.2 . . ? 
C5 N1 C1 119.0(2) . . ? 
C5 N1 Ag1 120.60(18) . . ? 
C1 N1 Ag1 117.78(17) . . ? 
C13 N11 N12 105.0(2) . . ? 
C13 N11 Ag1 137.3(2) . . ? 
N12 N11 Ag1 117.69(17) . . ? 
C11 N12 N11 111.6(2) . . ? 
C11 N12 C6 128.6(3) . . ? 
N11 N12 C6 119.7(2) . . ? 
C23 N21 N22 104.9(2) . . ? 
C23 N21 Ag1 132.8(2) . 4_575 ? 
N22 N21 Ag1 122.25(18) . 4_575 ? 
C21 N22 N21 111.0(3) . . ? 
C21 N22 C7 128.0(3) . . ? 
N21 N22 C7 120.8(2) . . ? 
O1 S1 O3 116.88(18) . . ? 
O1 S1 O2 112.5(2) . . ? 
O3 S1 O2 114.69(18) . . ? 
O1 S1 C31 103.21(18) . . ? 
O3 S1 C31 104.17(17) . . ? 
O2 S1 C31 103.26(19) . . ? 
S1 O1 Ag1 96.25(17) . . ? 
S1 O2 Ag1 89.08(16) . . ? 
S1 O3 Ag1 53.91(11) . . ? 
F2 C31 F3 107.6(3) . . ? 
F2 C31 F1 107.4(3) . . ? 
F3 C31 F1 108.2(3) . . ? 
F2 C31 S1 111.9(3) . . ? 
F3 C31 S1 111.3(2) . . ? 
F1 C31 S1 110.3(3) . . ? 
N41 C41 C42 179.7(6) . . ? 
C41 C42 H42A 109.5 . . ? 
C41 C42 H42B 109.5 . . ? 
H42A C42 H42B 109.5 . . ? 
C41 C42 H42C 109.5 . . ? 
H42A C42 H42C 109.5 . . ? 
H42B C42 H42C 109.5 . . ? 
  
loop_ 
 _geom_torsion_atom_site_label_1 
 _geom_torsion_atom_site_label_2 
 _geom_torsion_atom_site_label_3 
 _geom_torsion_atom_site_label_4 
 _geom_torsion 
 _geom_torsion_site_symmetry_1 
 _geom_torsion_site_symmetry_2 
 _geom_torsion_site_symmetry_3 
 _geom_torsion_site_symmetry_4 
 _geom_torsion_publ_flag 
N1 C1 C2 C3 -0.8(4) . . . . ? 
C6 C1 C2 C3 179.1(3) . . . . ? 
C1 C2 C3 C4 1.5(4) . . . . ? 
C2 C3 C4 C5 -0.3(4) . . . . ? 
C3 C4 C5 N1 -1.7(4) . . . . ? 
C3 C4 C5 C7 177.9(3) . . . . ? 
N1 C1 C6 N12 77.4(3) . . . . ? 
C2 C1 C6 N12 -102.5(3) . . . . ? 
N1 C5 C7 N22 170.7(2) . . . . ? 
C4 C5 C7 N22 -8.9(4) . . . . ? 
N12 C11 C12 C13 0.0(3) . . . . ? 
C11 C12 C13 N11 0.0(3) . . . . ? 
N22 C21 C22 C23 0.1(4) . . . . ? 
C21 C22 C23 N21 -0.6(4) . . . . ? 
C4 C5 N1 C1 2.3(4) . . . . ? 
C7 C5 N1 C1 -177.3(2) . . . . ? 
C4 C5 N1 Ag1 -158.9(2) . . . . ? 
C7 C5 N1 Ag1 21.5(3) . . . . ? 
C2 C1 N1 C5 -1.0(4) . . . . ? 
C6 C1 N1 C5 179.1(2) . . . . ? 
C2 C1 N1 Ag1 160.7(2) . . . . ? 
C6 C1 N1 Ag1 -19.2(3) . . . . ? 
N21 Ag1 N1 C5 -64.3(2) 4_576 . . . ? 
N11 Ag1 N1 C5 134.3(2) . . . . ? 
O1 Ag1 N1 C5 25.3(2) . . . . ? 
O2 Ag1 N1 C5 66.5(2) . . . . ? 
O3 Ag1 N1 C5 23.5(2) . . . . ? 
N21 Ag1 N1 C1 134.23(19) 4_576 . . . ? 
N11 Ag1 N1 C1 -27.14(19) . . . . ? 
O1 Ag1 N1 C1 -136.11(19) . . . . ? 
O2 Ag1 N1 C1 -95.0(2) . . . . ? 
O3 Ag1 N1 C1 -137.92(17) . . . . ? 
C12 C13 N11 N12 0.0(3) . . . . ? 
C12 C13 N11 Ag1 -178.9(2) . . . . ? 
N21 Ag1 N11 C13 59.3(3) 4_576 . . . ? 
N1 Ag1 N11 C13 -141.8(3) . . . . ? 
O1 Ag1 N11 C13 -46.8(3) . . . . ? 
O2 Ag1 N11 C13 -17.7(3) . . . . ? 
O3 Ag1 N11 C13 -8.4(3) . . . . ? 
N21 Ag1 N11 N12 -119.53(19) 4_576 . . . ? 
N1 Ag1 N11 N12 39.36(19) . . . . ? 
O1 Ag1 N11 N12 134.43(18) . . . . ? 
O2 Ag1 N11 N12 163.5(2) . . . . ? 
O3 Ag1 N11 N12 172.79(17) . . . . ? 
C12 C11 N12 N11 0.0(3) . . . . ? 
C12 C11 N12 C6 -177.0(3) . . . . ? 
C13 N11 N12 C11 0.0(3) . . . . ? 
Ag1 N11 N12 C11 179.17(18) . . . . ? 
C13 N11 N12 C6 177.4(2) . . . . ? 
Ag1 N11 N12 C6 -3.5(3) . . . . ? 
C1 C6 N12 C11 113.5(3) . . . . ? 
C1 C6 N12 N11 -63.3(3) . . . . ? 
C22 C23 N21 N22 0.9(3) . . . . ? 
C22 C23 N21 Ag1 -179.0(2) . . . 4_575 ? 
C22 C21 N22 N21 0.5(4) . . . . ? 
C22 C21 N22 C7 174.7(3) . . . . ? 
C23 N21 N22 C21 -0.9(3) . . . . ? 
Ag1 N21 N22 C21 179.0(2) 4_575 . . . ? 
C23 N21 N22 C7 -175.6(3) . . . . ? 
Ag1 N21 N22 C7 4.3(3) 4_575 . . . ? 
C5 C7 N22 C21 121.9(3) . . . . ? 
C5 C7 N22 N21 -64.4(4) . . . . ? 
O3 S1 O1 Ag1 94.06(19) . . . . ? 
O2 S1 O1 Ag1 -41.70(19) . . . . ? 
C31 S1 O1 Ag1 -152.32(13) . . . . ? 
N21 Ag1 O1 S1 -76.97(15) 4_576 . . . ? 
N11 Ag1 O1 S1 64.22(16) . . . . ? 
N1 Ag1 O1 S1 150.36(14) . . . . ? 
O2 Ag1 O1 S1 23.09(12) . . . . ? 
O3 Ag1 O1 S1 -31.90(10) . . . . ? 
O1 S1 O2 Ag1 38.75(18) . . . . ? 
O3 S1 O2 Ag1 -98.02(16) . . . . ? 
C31 S1 O2 Ag1 149.33(12) . . . . ? 
N21 Ag1 O2 S1 56.72(15) 4_576 . . . ? 
N11 Ag1 O2 S1 -162.66(16) . . . . ? 
N1 Ag1 O2 S1 -89.50(15) . . . . ? 
O1 Ag1 O2 S1 -22.77(12) . . . . ? 
O3 Ag1 O2 S1 32.36(10) . . . . ? 
O1 S1 O3 Ag1 -63.72(18) . . . . ? 
O2 S1 O3 Ag1 71.08(17) . . . . ? 
C31 S1 O3 Ag1 -176.81(15) . . . . ? 
N21 Ag1 O3 S1 166.54(15) 4_576 . . . ? 
N11 Ag1 O3 S1 -56.80(14) . . . . ? 
N1 Ag1 O3 S1 43.26(16) . . . . ? 
O1 Ag1 O3 S1 40.20(14) . . . . ? 
O2 Ag1 O3 S1 -41.49(13) . . . . ? 
O1 S1 C31 F2 -61.8(3) . . . . ? 
O3 S1 C31 F2 60.8(3) . . . . ? 
O2 S1 C31 F2 -179.1(3) . . . . ? 
O1 S1 C31 F3 58.6(3) . . . . ? 
O3 S1 C31 F3 -178.8(3) . . . . ? 
O2 S1 C31 F3 -58.7(3) . . . . ? 
O1 S1 C31 F1 178.8(3) . . . . ? 
O3 S1 C31 F1 -58.7(3) . . . . ? 
O2 S1 C31 F1 61.5(3) . . . . ? 
  
_diffrn_measured_fraction_theta_max    0.999 
_diffrn_reflns_theta_full              26.40 
_diffrn_measured_fraction_theta_full   0.999 
_refine_diff_density_max    0.828 
_refine_diff_density_min   -0.385 
_refine_diff_density_rms    0.084 

#===END

data_cmpd3 
  
_audit_creation_method            SHELXL-97 
_chemical_name_systematic 
; 
 ? 
; 
_chemical_name_common             ? 
_chemical_melting_point           ? 
_chemical_formula_moiety 
 'C13 H13 Cl N5 Pt, B F4' 
_chemical_formula_sum 
 'C13 H13 B Cl F4 N5 Pt' 
_chemical_formula_weight          556.63 
  
loop_ 
 _atom_type_symbol 
 _atom_type_description 
 _atom_type_scat_dispersion_real 
 _atom_type_scat_dispersion_imag 
 _atom_type_scat_source 
 'C'  'C'   0.0033   0.0016 
 'International Tables Vol C Tables 4.2.6.8 and 6.1.1.4' 
 'H'  'H'   0.0000   0.0000 
 'International Tables Vol C Tables 4.2.6.8 and 6.1.1.4' 
 'N'  'N'   0.0061   0.0033 
 'International Tables Vol C Tables 4.2.6.8 and 6.1.1.4' 
 'Cl'  'Cl'   0.1484   0.1585 
 'International Tables Vol C Tables 4.2.6.8 and 6.1.1.4' 
 'Pt'  'Pt'  -1.7033   8.3905 
 'International Tables Vol C Tables 4.2.6.8 and 6.1.1.4' 
 'F'  'F'   0.0171   0.0103 
 'International Tables Vol C Tables 4.2.6.8 and 6.1.1.4' 
 'B'  'B'   0.0013   0.0007 
 'International Tables Vol C Tables 4.2.6.8 and 6.1.1.4' 
  
_symmetry_cell_setting            Monoclinic 
_symmetry_space_group_name_H-M    'C 2/c' 
_symmetry_space_group_name_Hall   '-C 2yc' 
  
loop_ 
 _symmetry_equiv_pos_as_xyz 
 'x, y, z' 
 '-x, y, -z+1/2' 
 'x+1/2, y+1/2, z' 
 '-x+1/2, y+1/2, -z+1/2' 
 '-x, -y, -z' 
 'x, -y, z-1/2' 
 '-x+1/2, -y+1/2, -z' 
 'x+1/2, -y+1/2, z-1/2' 
  
_cell_length_a                    16.4622(10) 
_cell_length_b                    10.5959(6) 
_cell_length_c                    20.3165(12) 
_cell_angle_alpha                 90.00 
_cell_angle_beta                  112.1340(10) 
_cell_angle_gamma                 90.00 
_cell_volume                      3282.7(3) 
_cell_formula_units_Z             8 
_cell_measurement_temperature     150(2) 
_cell_measurement_reflns_used     6269 
_cell_measurement_theta_min       2.358 
_cell_measurement_theta_max       27.871 
  
_exptl_crystal_description        prism 
_exptl_crystal_colour             colorless 
_exptl_crystal_size_max           0.44 
_exptl_crystal_size_mid           0.26 
_exptl_crystal_size_min           0.16 
_exptl_crystal_density_meas       ? 
_exptl_crystal_density_diffrn     2.253 
_exptl_crystal_density_method     'not measured' 
_exptl_crystal_F_000              2096 
_exptl_absorpt_coefficient_mu     8.760 
_exptl_absorpt_correction_type    multi-scan 
_exptl_absorpt_correction_T_min   0.3633 
_exptl_absorpt_correction_T_max   1.0000 
_exptl_absorpt_process_details    '(SADABS, Bruker, 2001)' 
  
_exptl_special_details 
; 
 ? 
; 
  
_diffrn_ambient_temperature       150(2) 
_diffrn_radiation_wavelength      0.71073 
_diffrn_radiation_type            MoK\a 
_diffrn_radiation_source          'fine-focus sealed tube' 
_diffrn_radiation_monochromator   graphite 
_diffrn_measurement_device_type   'Bruker SMART APEX CCD diffractometer' 
_diffrn_measurement_method        'omega scans' 
_diffrn_detector_area_resol_mean  ? 
_diffrn_standards_number          ? 
_diffrn_standards_interval_count  ? 
_diffrn_standards_interval_time   ? 
_diffrn_standards_decay_%         none 
_diffrn_reflns_number             15810 
_diffrn_reflns_av_R_equivalents   0.0311 
_diffrn_reflns_av_sigmaI/netI     0.0261 
_diffrn_reflns_limit_h_min        -21 
_diffrn_reflns_limit_h_max        21 
_diffrn_reflns_limit_k_min        -11 
_diffrn_reflns_limit_k_max        13 
_diffrn_reflns_limit_l_min        -26 
_diffrn_reflns_limit_l_max        26 
_diffrn_reflns_theta_min          2.16 
_diffrn_reflns_theta_max          27.89 
_reflns_number_total              3919 
_reflns_number_gt                 3778 
_reflns_threshold_expression      >2sigma(I) 
  
_computing_data_collection        'SMART NT V5.625 (Bruker, 1998)' 
_computing_cell_refinement        'SAINT+ NT V6.22 (Bruker, 2001)' 
_computing_data_reduction         'SAINT+ NT V6.22' 
_computing_structure_solution     'SHELXS-97 (Sheldrick, 1990)' 
_computing_structure_refinement   'SHELXL-97 (Sheldrick, 1997)' 
_computing_molecular_graphics     'SHELXTL V6.1 (Sheldrick, 2000)' 
_computing_publication_material   'SHELXTL V6.1' 
  
_refine_special_details 
; 
 Refinement of F^2^ against ALL reflections.  The weighted R-factor wR and 
 goodness of fit S are based on F^2^, conventional R-factors R are based 
 on F, with F set to zero for negative F^2^. The threshold expression of 
 F^2^ > 2sigma(F^2^) is used only for calculating R-factors(gt) etc. and is 
 not relevant to the choice of reflections for refinement.  R-factors based 
 on F^2^ are statistically about twice as large as those based on F, and R- 
 factors based on ALL data will be even larger. 
; 
  
_refine_ls_structure_factor_coef  Fsqd 
_refine_ls_matrix_type            full 
_refine_ls_weighting_scheme       calc 
_refine_ls_weighting_details 
 'calc w=1/[\s^2^(Fo^2^)+(0.0223P)^2^+9.3882P] where P=(Fo^2^+2Fc^2^)/3' 
_atom_sites_solution_primary      direct 
_atom_sites_solution_secondary    difmap 
_atom_sites_solution_hydrogens    geom 
_refine_ls_hydrogen_treatment     constr 
_refine_ls_extinction_method      none 
_refine_ls_extinction_coef        ? 
_refine_ls_number_reflns          3919 
_refine_ls_number_parameters      226 
_refine_ls_number_restraints      0 
_refine_ls_R_factor_all           0.0237 
_refine_ls_R_factor_gt            0.0224 
_refine_ls_wR_factor_ref          0.0553 
_refine_ls_wR_factor_gt           0.0547 
_refine_ls_goodness_of_fit_ref    1.156 
_refine_ls_restrained_S_all       1.156 
_refine_ls_shift/su_max           0.002 
_refine_ls_shift/su_mean          0.000 
  
loop_ 
 _atom_site_label 
 _atom_site_type_symbol 
 _atom_site_fract_x 
 _atom_site_fract_y 
 _atom_site_fract_z 
 _atom_site_U_iso_or_equiv 
 _atom_site_adp_type 
 _atom_site_occupancy 
 _atom_site_symmetry_multiplicity 
 _atom_site_calc_flag 
 _atom_site_refinement_flags 
 _atom_site_disorder_assembly 
 _atom_site_disorder_group 
Pt1 Pt 0.588341(7) 0.201884(11) 0.455594(6) 0.01907(5) Uani 1 1 d . . . 
Cl1 Cl 0.70078(5) 0.06041(8) 0.48492(5) 0.02891(17) Uani 1 1 d . . . 
C1 C 0.4204(2) 0.3139(3) 0.44848(17) 0.0207(6) Uani 1 1 d . . . 
C2 C 0.3570(2) 0.4057(3) 0.43690(18) 0.0253(7) Uani 1 1 d . . . 
H2 H 0.3089 0.3920 0.4510 0.030 Uiso 1 1 calc R . . 
C3 C 0.3641(2) 0.5173(3) 0.40481(19) 0.0283(7) Uani 1 1 d . . . 
H3 H 0.3205 0.5807 0.3960 0.034 Uiso 1 1 calc R . . 
C4 C 0.4354(2) 0.5362(3) 0.38547(18) 0.0254(7) Uani 1 1 d . . . 
H4 H 0.4405 0.6119 0.3623 0.030 Uiso 1 1 calc R . . 
C5 C 0.4992(2) 0.4432(3) 0.40034(16) 0.0215(6) Uani 1 1 d . . . 
C6 C 0.4114(2) 0.1881(3) 0.47901(18) 0.0241(7) Uani 1 1 d . . . 
H6A H 0.3570 0.1875 0.4891 0.029 Uiso 1 1 calc R . . 
H6B H 0.4061 0.1213 0.4436 0.029 Uiso 1 1 calc R . . 
C7 C 0.5809(2) 0.4660(3) 0.38581(18) 0.0245(7) Uani 1 1 d . . . 
H7A H 0.5749 0.5469 0.3601 0.029 Uiso 1 1 calc R . . 
H7B H 0.6314 0.4738 0.4316 0.029 Uiso 1 1 calc R . . 
C11 C 0.4885(2) 0.1309(3) 0.60935(18) 0.0290(7) Uani 1 1 d . . . 
H11 H 0.4394 0.1265 0.6231 0.035 Uiso 1 1 calc R . . 
C12 C 0.5746(3) 0.1084(4) 0.65235(19) 0.0313(8) Uani 1 1 d . . . 
H12 H 0.5967 0.0853 0.7011 0.038 Uiso 1 1 calc R . . 
C13 C 0.6226(2) 0.1264(3) 0.60923(18) 0.0278(7) Uani 1 1 d . . . 
H13 H 0.6845 0.1182 0.6243 0.033 Uiso 1 1 calc R . . 
C21 C 0.6168(2) 0.3744(4) 0.2849(2) 0.0349(8) Uani 1 1 d . . . 
H21 H 0.6164 0.4495 0.2593 0.042 Uiso 1 1 calc R . . 
C22 C 0.6355(3) 0.2561(5) 0.2683(2) 0.0371(9) Uani 1 1 d . . . 
H22 H 0.6503 0.2325 0.2291 0.044 Uiso 1 1 calc R . . 
C23 C 0.6286(2) 0.1767(4) 0.3207(2) 0.0319(8) Uani 1 1 d . . . 
H23 H 0.6374 0.0879 0.3230 0.038 Uiso 1 1 calc R . . 
N1 N 0.49135(16) 0.3330(3) 0.43117(13) 0.0182(5) Uani 1 1 d . . . 
N11 N 0.56821(17) 0.1572(3) 0.54343(14) 0.0219(5) Uani 1 1 d . . . 
N12 N 0.48655(17) 0.1602(3) 0.54464(14) 0.0228(5) Uani 1 1 d . . . 
N21 N 0.60745(18) 0.2456(3) 0.36742(15) 0.0244(6) Uani 1 1 d . . . 
N22 N 0.59908(18) 0.3657(3) 0.34402(15) 0.0253(6) Uani 1 1 d . . . 
B1 B 0.1842(3) 0.2329(4) 0.3336(2) 0.0309(9) Uani 1 1 d . . . 
F1 F 0.11058(17) 0.1746(2) 0.28438(13) 0.0450(6) Uani 1 1 d . . . 
F2 F 0.18563(16) 0.2178(2) 0.40226(13) 0.0396(5) Uani 1 1 d . . . 
F3 F 0.1817(2) 0.3612(3) 0.31893(14) 0.0576(8) Uani 1 1 d . . . 
F4 F 0.25910(19) 0.1771(3) 0.33167(16) 0.0566(7) Uani 1 1 d . . . 
  
loop_ 
 _atom_site_aniso_label 
 _atom_site_aniso_U_11 
 _atom_site_aniso_U_22 
 _atom_site_aniso_U_33 
 _atom_site_aniso_U_23 
 _atom_site_aniso_U_13 
 _atom_site_aniso_U_12 
Pt1 0.01443(7) 0.02094(8) 0.02210(7) -0.00054(4) 0.00719(5) 0.00292(4) 
Cl1 0.0198(3) 0.0276(4) 0.0406(4) 0.0035(3) 0.0128(3) 0.0080(3) 
C1 0.0154(14) 0.0233(16) 0.0228(15) -0.0026(12) 0.0063(11) 0.0008(11) 
C2 0.0166(13) 0.0280(18) 0.0307(16) -0.0069(14) 0.0082(12) -0.0004(12) 
C3 0.0203(15) 0.0257(18) 0.0349(17) -0.0035(14) 0.0057(13) 0.0064(13) 
C4 0.0259(16) 0.0200(16) 0.0275(16) -0.0001(13) 0.0070(13) 0.0008(13) 
C5 0.0181(14) 0.0237(16) 0.0214(14) -0.0034(12) 0.0061(11) -0.0006(12) 
C6 0.0194(15) 0.0255(17) 0.0271(16) 0.0017(13) 0.0085(13) 0.0014(12) 
C7 0.0235(15) 0.0224(17) 0.0298(16) 0.0010(13) 0.0124(13) 0.0000(12) 
C11 0.0348(18) 0.0282(19) 0.0277(16) -0.0008(14) 0.0159(14) 0.0011(14) 
C12 0.0396(19) 0.0282(19) 0.0240(16) 0.0010(14) 0.0096(14) 0.0008(15) 
C13 0.0269(16) 0.0263(18) 0.0244(15) -0.0012(13) 0.0031(13) 0.0032(13) 
C21 0.0304(18) 0.047(2) 0.0306(18) 0.0075(16) 0.0157(14) 0.0021(16) 
C22 0.0344(19) 0.054(3) 0.0286(18) -0.0051(18) 0.0179(16) 0.0019(19) 
C23 0.0274(17) 0.039(2) 0.0324(18) -0.0049(16) 0.0154(14) 0.0051(15) 
N1 0.0161(11) 0.0193(13) 0.0185(12) -0.0026(10) 0.0058(9) -0.0011(10) 
N11 0.0182(12) 0.0229(14) 0.0235(13) 0.0000(11) 0.0067(10) 0.0036(11) 
N12 0.0194(12) 0.0251(14) 0.0251(13) 0.0009(11) 0.0099(10) 0.0017(11) 
N21 0.0218(13) 0.0248(15) 0.0286(14) -0.0002(12) 0.0120(11) 0.0018(12) 
N22 0.0221(13) 0.0282(16) 0.0273(13) 0.0014(12) 0.0113(11) 0.0012(11) 
B1 0.0270(19) 0.030(2) 0.033(2) 0.0019(17) 0.0085(16) -0.0045(16) 
F1 0.0409(13) 0.0435(14) 0.0395(13) 0.0042(11) 0.0026(11) -0.0143(11) 
F2 0.0383(13) 0.0462(15) 0.0369(12) 0.0012(10) 0.0171(10) -0.0012(10) 
F3 0.0686(18) 0.0376(15) 0.0425(14) 0.0102(12) -0.0065(13) -0.0136(13) 
F4 0.0411(14) 0.081(2) 0.0564(16) 0.0006(15) 0.0279(13) 0.0075(14) 
  
_geom_special_details 
; 
 All esds (except the esd in the dihedral angle between two l.s. planes) 
 are estimated using the full covariance matrix.  The cell esds are taken 
 into account individually in the estimation of esds in distances, angles 
 and torsion angles; correlations between esds in cell parameters are only 
 used when they are defined by crystal symmetry.  An approximate (isotropic) 
 treatment of cell esds is used for estimating esds involving l.s. planes. 
; 
  
loop_ 
 _geom_bond_atom_site_label_1 
 _geom_bond_atom_site_label_2 
 _geom_bond_distance 
 _geom_bond_site_symmetry_2 
 _geom_bond_publ_flag 
Pt1 N21 1.987(3) . ? 
Pt1 N11 1.991(3) . ? 
Pt1 N1 2.032(3) . ? 
Pt1 Cl1 2.2798(8) . ? 
C1 N1 1.355(4) . ? 
C1 C2 1.381(5) . ? 
C1 C6 1.501(5) . ? 
C2 C3 1.376(5) . ? 
C2 H2 0.9500 . ? 
C3 C4 1.385(5) . ? 
C3 H3 0.9500 . ? 
C4 C5 1.389(5) . ? 
C4 H4 0.9500 . ? 
C5 N1 1.354(4) . ? 
C5 C7 1.502(4) . ? 
C6 N12 1.467(4) . ? 
C6 H6A 0.9900 . ? 
C6 H6B 0.9900 . ? 
C7 N22 1.459(4) . ? 
C7 H7A 0.9900 . ? 
C7 H7B 0.9900 . ? 
C11 N12 1.339(4) . ? 
C11 C12 1.377(5) . ? 
C11 H11 0.9500 . ? 
C12 C13 1.397(5) . ? 
C12 H12 0.9500 . ? 
C13 N11 1.339(4) . ? 
C13 H13 0.9500 . ? 
C21 N22 1.341(5) . ? 
C21 C22 1.364(6) . ? 
C21 H21 0.9500 . ? 
C22 C23 1.395(6) . ? 
C22 H22 0.9500 . ? 
C23 N21 1.343(5) . ? 
C23 H23 0.9500 . ? 
N11 N12 1.354(4) . ? 
N21 N22 1.347(4) . ? 
B1 F4 1.381(5) . ? 
B1 F3 1.389(6) . ? 
B1 F1 1.392(5) . ? 
B1 F2 1.395(5) . ? 
  
loop_ 
 _geom_angle_atom_site_label_1 
 _geom_angle_atom_site_label_2 
 _geom_angle_atom_site_label_3 
 _geom_angle 
 _geom_angle_site_symmetry_1 
 _geom_angle_site_symmetry_3 
 _geom_angle_publ_flag 
N21 Pt1 N11 179.48(11) . . ? 
N21 Pt1 N1 89.83(11) . . ? 
N11 Pt1 N1 90.03(11) . . ? 
N21 Pt1 Cl1 90.02(9) . . ? 
N11 Pt1 Cl1 90.13(8) . . ? 
N1 Pt1 Cl1 177.92(8) . . ? 
N1 C1 C2 121.4(3) . . ? 
N1 C1 C6 118.0(3) . . ? 
C2 C1 C6 120.6(3) . . ? 
C3 C2 C1 119.5(3) . . ? 
C3 C2 H2 120.2 . . ? 
C1 C2 H2 120.2 . . ? 
C2 C3 C4 119.4(3) . . ? 
C2 C3 H3 120.3 . . ? 
C4 C3 H3 120.3 . . ? 
C3 C4 C5 119.2(3) . . ? 
C3 C4 H4 120.4 . . ? 
C5 C4 H4 120.4 . . ? 
N1 C5 C4 121.1(3) . . ? 
N1 C5 C7 118.6(3) . . ? 
C4 C5 C7 120.2(3) . . ? 
N12 C6 C1 111.9(3) . . ? 
N12 C6 H6A 109.2 . . ? 
C1 C6 H6A 109.2 . . ? 
N12 C6 H6B 109.2 . . ? 
C1 C6 H6B 109.2 . . ? 
H6A C6 H6B 107.9 . . ? 
N22 C7 C5 113.1(3) . . ? 
N22 C7 H7A 109.0 . . ? 
C5 C7 H7A 109.0 . . ? 
N22 C7 H7B 109.0 . . ? 
C5 C7 H7B 109.0 . . ? 
H7A C7 H7B 107.8 . . ? 
N12 C11 C12 107.5(3) . . ? 
N12 C11 H11 126.2 . . ? 
C12 C11 H11 126.2 . . ? 
C11 C12 C13 105.6(3) . . ? 
C11 C12 H12 127.2 . . ? 
C13 C12 H12 127.2 . . ? 
N11 C13 C12 109.6(3) . . ? 
N11 C13 H13 125.2 . . ? 
C12 C13 H13 125.2 . . ? 
N22 C21 C22 107.7(4) . . ? 
N22 C21 H21 126.2 . . ? 
C22 C21 H21 126.2 . . ? 
C21 C22 C23 105.9(3) . . ? 
C21 C22 H22 127.0 . . ? 
C23 C22 H22 127.0 . . ? 
N21 C23 C22 109.2(4) . . ? 
N21 C23 H23 125.4 . . ? 
C22 C23 H23 125.4 . . ? 
C5 N1 C1 119.4(3) . . ? 
C5 N1 Pt1 119.9(2) . . ? 
C1 N1 Pt1 120.6(2) . . ? 
C13 N11 N12 106.4(3) . . ? 
C13 N11 Pt1 132.7(2) . . ? 
N12 N11 Pt1 120.8(2) . . ? 
C11 N12 N11 110.8(3) . . ? 
C11 N12 C6 129.7(3) . . ? 
N11 N12 C6 119.4(3) . . ? 
C23 N21 N22 106.5(3) . . ? 
C23 N21 Pt1 132.9(3) . . ? 
N22 N21 Pt1 120.6(2) . . ? 
C21 N22 N21 110.7(3) . . ? 
C21 N22 C7 129.2(3) . . ? 
N21 N22 C7 119.9(3) . . ? 
F4 B1 F3 111.6(3) . . ? 
F4 B1 F1 109.5(4) . . ? 
F3 B1 F1 109.4(3) . . ? 
F4 B1 F2 107.5(3) . . ? 
F3 B1 F2 108.4(4) . . ? 
F1 B1 F2 110.5(3) . . ? 
  
loop_ 
 _geom_torsion_atom_site_label_1 
 _geom_torsion_atom_site_label_2 
 _geom_torsion_atom_site_label_3 
 _geom_torsion_atom_site_label_4 
 _geom_torsion 
 _geom_torsion_site_symmetry_1 
 _geom_torsion_site_symmetry_2 
 _geom_torsion_site_symmetry_3 
 _geom_torsion_site_symmetry_4 
 _geom_torsion_publ_flag 
N1 C1 C2 C3 2.4(5) . . . . ? 
C6 C1 C2 C3 -176.0(3) . . . . ? 
C1 C2 C3 C4 -0.8(5) . . . . ? 
C2 C3 C4 C5 -1.4(5) . . . . ? 
C3 C4 C5 N1 2.2(5) . . . . ? 
C3 C4 C5 C7 -174.6(3) . . . . ? 
N1 C1 C6 N12 58.9(4) . . . . ? 
C2 C1 C6 N12 -122.7(3) . . . . ? 
N1 C5 C7 N22 54.4(4) . . . . ? 
C4 C5 C7 N22 -128.7(3) . . . . ? 
N12 C11 C12 C13 0.2(4) . . . . ? 
C11 C12 C13 N11 -0.5(4) . . . . ? 
N22 C21 C22 C23 -0.4(4) . . . . ? 
C21 C22 C23 N21 -0.7(4) . . . . ? 
C4 C5 N1 C1 -0.7(4) . . . . ? 
C7 C5 N1 C1 176.1(3) . . . . ? 
C4 C5 N1 Pt1 -177.6(2) . . . . ? 
C7 C5 N1 Pt1 -0.8(4) . . . . ? 
C2 C1 N1 C5 -1.6(4) . . . . ? 
C6 C1 N1 C5 176.8(3) . . . . ? 
C2 C1 N1 Pt1 175.3(2) . . . . ? 
C6 C1 N1 Pt1 -6.3(4) . . . . ? 
N21 Pt1 N1 C5 -37.0(2) . . . . ? 
N11 Pt1 N1 C5 143.5(2) . . . . ? 
N21 Pt1 N1 C1 146.1(2) . . . . ? 
N11 Pt1 N1 C1 -33.4(2) . . . . ? 
C12 C13 N11 N12 0.7(4) . . . . ? 
C12 C13 N11 Pt1 177.6(3) . . . . ? 
N1 Pt1 N11 C13 -141.9(3) . . . . ? 
Cl1 Pt1 N11 C13 36.1(3) . . . . ? 
N1 Pt1 N11 N12 34.7(3) . . . . ? 
Cl1 Pt1 N11 N12 -147.4(2) . . . . ? 
C12 C11 N12 N11 0.2(4) . . . . ? 
C12 C11 N12 C6 177.7(3) . . . . ? 
C13 N11 N12 C11 -0.6(4) . . . . ? 
Pt1 N11 N12 C11 -178.0(2) . . . . ? 
C13 N11 N12 C6 -178.3(3) . . . . ? 
Pt1 N11 N12 C6 4.3(4) . . . . ? 
C1 C6 N12 C11 124.4(4) . . . . ? 
C1 C6 N12 N11 -58.3(4) . . . . ? 
C22 C23 N21 N22 1.5(4) . . . . ? 
C22 C23 N21 Pt1 -178.8(3) . . . . ? 
N1 Pt1 N21 C23 -143.7(3) . . . . ? 
Cl1 Pt1 N21 C23 38.3(3) . . . . ? 
N1 Pt1 N21 N22 35.9(2) . . . . ? 
Cl1 Pt1 N21 N22 -142.0(2) . . . . ? 
C22 C21 N22 N21 1.3(4) . . . . ? 
C22 C21 N22 C7 175.6(3) . . . . ? 
C23 N21 N22 C21 -1.7(4) . . . . ? 
Pt1 N21 N22 C21 178.5(2) . . . . ? 
C23 N21 N22 C7 -176.6(3) . . . . ? 
Pt1 N21 N22 C7 3.7(4) . . . . ? 
C5 C7 N22 C21 129.4(4) . . . . ? 
C5 C7 N22 N21 -56.8(4) . . . . ? 
  
_diffrn_measured_fraction_theta_max    0.998 
_diffrn_reflns_theta_full              27.89 
_diffrn_measured_fraction_theta_full   0.998 
_refine_diff_density_max    0.918 
_refine_diff_density_min   -1.122 
_refine_diff_density_rms    0.136 

#===END

data_cmpd4 
  
_audit_creation_method            SHELXL-97 
_chemical_name_systematic 
; 
 ? 
; 
_chemical_name_common             ? 
_chemical_melting_point           ? 
_chemical_formula_moiety 
; 
[(C13 H13 N5)2 Cd], (C10 H8 N2), (B F4)2, 0.5(H2 O) 
; 
_chemical_formula_sum 
 'C36 H35 B2 Cd F8 N12 O0.50' 
_chemical_formula_weight          929.78 
  
loop_ 
 _atom_type_symbol 
 _atom_type_description 
 _atom_type_scat_dispersion_real 
 _atom_type_scat_dispersion_imag 
 _atom_type_scat_source 
 'C'  'C'   0.0033   0.0016 
 'International Tables Vol C Tables 4.2.6.8 and 6.1.1.4' 
 'H'  'H'   0.0000   0.0000 
 'International Tables Vol C Tables 4.2.6.8 and 6.1.1.4' 
 'B'  'B'   0.0013   0.0007 
 'International Tables Vol C Tables 4.2.6.8 and 6.1.1.4' 
 'N'  'N'   0.0061   0.0033 
 'International Tables Vol C Tables 4.2.6.8 and 6.1.1.4' 
 'O'  'O'   0.0106   0.0060 
 'International Tables Vol C Tables 4.2.6.8 and 6.1.1.4' 
 'F'  'F'   0.0171   0.0103 
 'International Tables Vol C Tables 4.2.6.8 and 6.1.1.4' 
 'Cd'  'Cd'  -0.8075   1.2024 
 'International Tables Vol C Tables 4.2.6.8 and 6.1.1.4' 
  
_symmetry_cell_setting            Monoclinic 
_symmetry_space_group_name_H-M    'I 2/a' 
_symmetry_space_group_name_Hall   '-I 2ya'
  
loop_ 
 _symmetry_equiv_pos_as_xyz 
 'x, y, z' 
 '-x+1/2, y, -z' 
 'x+1/2, y+1/2, z+1/2' 
 '-x+1, y+1/2, -z+1/2' 
 '-x, -y, -z' 
 'x-1/2, -y, z' 
 '-x+1/2, -y+1/2, -z+1/2' 
 'x, -y+1/2, z+1/2' 
  
_cell_length_a                    19.1440(13) 
_cell_length_b                    18.8439(13) 
_cell_length_c                    10.6967(7) 
_cell_angle_alpha                 90.00 
_cell_angle_beta                  90.2570(10) 
_cell_angle_gamma                 90.00 
_cell_volume                      3858.8(5) 
_cell_formula_units_Z             4 
_cell_measurement_temperature     150(2) 
_cell_measurement_reflns_used     7059 
_cell_measurement_theta_min       3.034 
_cell_measurement_theta_max       26.432 
  
_exptl_crystal_description        block 
_exptl_crystal_colour             colorless 
_exptl_crystal_size_max           0.42 
_exptl_crystal_size_mid           0.36 
_exptl_crystal_size_min           0.30 
_exptl_crystal_density_meas       ? 
_exptl_crystal_density_diffrn     1.600 
_exptl_crystal_density_method     'not measured' 
_exptl_crystal_F_000              1876 
_exptl_absorpt_coefficient_mu     0.652 
_exptl_absorpt_correction_type    multi-scan 
_exptl_absorpt_correction_T_min   0.8475 
_exptl_absorpt_correction_T_max   1.0000 
_exptl_absorpt_process_details    'SADABS (Bruker, 2001)' 
  
_exptl_special_details 
; 
 ? 
; 
  
_diffrn_ambient_temperature       150(2) 
_diffrn_radiation_wavelength      0.71073 
_diffrn_radiation_type            MoK\a 
_diffrn_radiation_source          'fine-focus sealed tube' 
_diffrn_radiation_monochromator   graphite 
_diffrn_measurement_device_type   'Bruker SMART APEX CCD diffractometer' 
_diffrn_measurement_method        'omega scans' 
_diffrn_detector_area_resol_mean  ? 
_diffrn_standards_number          ? 
_diffrn_standards_interval_count  ? 
_diffrn_standards_interval_time   ? 
_diffrn_standards_decay_%         none 
_diffrn_reflns_number             17149 
_diffrn_reflns_av_R_equivalents   0.0260 
_diffrn_reflns_av_sigmaI/netI     0.0228 
_diffrn_reflns_limit_h_min        -23 
_diffrn_reflns_limit_h_max        23 
_diffrn_reflns_limit_k_min        -23 
_diffrn_reflns_limit_k_max        23 
_diffrn_reflns_limit_l_min        -13 
_diffrn_reflns_limit_l_max        13 
_diffrn_reflns_theta_min          1.52 
_diffrn_reflns_theta_max          26.43 
_reflns_number_total              3968 
_reflns_number_gt                 3865 
_reflns_threshold_expression      >2sigma(I) 
  
_computing_data_collection        'SMART NT V5.628 (Bruker, 2001)' 
_computing_cell_refinement        'SAINT+ NT V6.22 (Bruker, 2001)' 
_computing_data_reduction         'SAINT+ NT V6.22' 
_computing_structure_solution     'SHELXS-97 (Sheldrick, 1997)' 
_computing_structure_refinement   'SHELXL-97 (Sheldrick, 1997)' 
_computing_molecular_graphics     'SHELXTL V6.1 (Sheldrick, 2000)' 
_computing_publication_material   'SHELXTL V6.1' 
  
_refine_special_details 
; 
Hydrogens on disordered water molecules not located or calculated. 
  
 Refinement of F^2^ against ALL reflections.  The weighted R-factor wR and 
 goodness of fit S are based on F^2^, conventional R-factors R are based 
 on F, with F set to zero for negative F^2^. The threshold expression of 
 F^2^ > 2sigma(F^2^) is used only for calculating R-factors(gt) etc. and is 
 not relevant to the choice of reflections for refinement.  R-factors based 
 on F^2^ are statistically about twice as large as those based on F, and R- 
 factors based on ALL data will be even larger. 
; 
  
_refine_ls_structure_factor_coef  Fsqd 
_refine_ls_matrix_type            full 
_refine_ls_weighting_scheme       calc 
_refine_ls_weighting_details 
 'calc w=1/[\s^2^(Fo^2^)+(0.0378P)^2^+8.0780P] where P=(Fo^2^+2Fc^2^)/3' 
_atom_sites_solution_primary      direct 
_atom_sites_solution_secondary    difmap 
_atom_sites_solution_hydrogens    geom 
_refine_ls_hydrogen_treatment     constr 
_refine_ls_extinction_method      none 
_refine_ls_extinction_coef        ? 
_refine_ls_number_reflns          3968 
_refine_ls_number_parameters      277 
_refine_ls_number_restraints      0 
_refine_ls_R_factor_all           0.0348 
_refine_ls_R_factor_gt            0.0339 
_refine_ls_wR_factor_ref          0.0855 
_refine_ls_wR_factor_gt           0.0849 
_refine_ls_goodness_of_fit_ref    1.095 
_refine_ls_restrained_S_all       1.095 
_refine_ls_shift/su_max           0.002 
_refine_ls_shift/su_mean          0.000 
  
loop_ 
 _atom_site_label 
 _atom_site_type_symbol 
 _atom_site_fract_x 
 _atom_site_fract_y 
 _atom_site_fract_z 
 _atom_site_U_iso_or_equiv 
 _atom_site_adp_type 
 _atom_site_occupancy 
 _atom_site_symmetry_multiplicity 
 _atom_site_calc_flag 
 _atom_site_refinement_flags 
 _atom_site_disorder_assembly 
 _atom_site_disorder_group 
Cd1 Cd 0.7500 0.511309(13) 0.0000 0.02817(9) Uani 1 2 d S . . 
C1 C 0.59599(12) 0.46021(13) 0.1103(2) 0.0318(5) Uani 1 1 d . . . 
C2 C 0.52746(13) 0.46396(15) 0.1507(2) 0.0365(5) Uani 1 1 d . . . 
H2 H 0.4999 0.4222 0.1565 0.044 Uiso 1 1 calc R . . 
C3 C 0.49977(13) 0.52882(15) 0.1821(2) 0.0353(5) Uani 1 1 d . . . 
H3 H 0.4527 0.5325 0.2089 0.042 Uiso 1 1 calc R . . 
C4 C 0.54115(12) 0.58843(14) 0.1742(2) 0.0315(5) Uani 1 1 d . . . 
H4 H 0.5233 0.6336 0.1973 0.038 Uiso 1 1 calc R . . 
C5 C 0.60928(11) 0.58160(12) 0.1320(2) 0.0269(4) Uani 1 1 d . . . 
C6 C 0.62919(14) 0.38960(13) 0.0813(2) 0.0372(5) Uani 1 1 d . . . 
H6A H 0.6735 0.3854 0.1289 0.045 Uiso 1 1 calc R . . 
H6B H 0.5977 0.3511 0.1094 0.045 Uiso 1 1 calc R . . 
C7 C 0.65579(11) 0.64582(12) 0.1227(2) 0.0287(5) Uani 1 1 d . . . 
H7A H 0.6686 0.6535 0.0341 0.034 Uiso 1 1 calc R . . 
H7B H 0.6298 0.6881 0.1515 0.034 Uiso 1 1 calc R . . 
C11 C 0.61489(15) 0.33264(14) -0.1303(3) 0.0441(6) Uani 1 1 d . . . 
H11 H 0.5809 0.2978 -0.1100 0.053 Uiso 1 1 calc R . . 
C12 C 0.64405(16) 0.34388(17) -0.2457(3) 0.0505(7) Uani 1 1 d . . . 
H12 H 0.6347 0.3184 -0.3205 0.061 Uiso 1 1 calc R . . 
C13 C 0.69007(15) 0.40026(16) -0.2301(3) 0.0440(6) Uani 1 1 d . . . 
H13 H 0.7178 0.4200 -0.2949 0.053 Uiso 1 1 calc R . . 
C21 C 0.73625(13) 0.67022(13) 0.3057(2) 0.0316(5) Uani 1 1 d . . . 
H21 H 0.7078 0.7026 0.3507 0.038 Uiso 1 1 calc R . . 
C22 C 0.80165(13) 0.64791(14) 0.3393(2) 0.0351(5) Uani 1 1 d . . . 
H22 H 0.8279 0.6615 0.4110 0.042 Uiso 1 1 calc R . . 
C23 C 0.82120(12) 0.60085(14) 0.2455(2) 0.0342(5) Uani 1 1 d . . . 
H23 H 0.8646 0.5763 0.2436 0.041 Uiso 1 1 calc R . . 
N1 N 0.63660(10) 0.51863(10) 0.09852(18) 0.0281(4) Uani 1 1 d . . . 
N11 N 0.69011(11) 0.42325(12) -0.1105(2) 0.0367(5) Uani 1 1 d . . . 
N12 N 0.64352(11) 0.38040(11) -0.0510(2) 0.0361(5) Uani 1 1 d . . . 
N21 N 0.77155(10) 0.59445(11) 0.15855(18) 0.0310(4) Uani 1 1 d . . . 
N22 N 0.71951(9) 0.63815(10) 0.19742(18) 0.0270(4) Uani 1 1 d . . . 
C31 C 0.6070(2) 0.3866(2) 0.4268(4) 0.0746(12) Uani 1 1 d . . . 
H31 H 0.6113 0.3368 0.4151 0.090 Uiso 1 1 calc R . . 
C32 C 0.5426(2) 0.41231(19) 0.4644(4) 0.0661(10) Uani 1 1 d . . . 
H32 H 0.5046 0.3807 0.4776 0.079 Uiso 1 1 calc R . . 
C33 C 0.53421(17) 0.48430(16) 0.4823(3) 0.0454(7) Uani 1 1 d . . . 
C34 C 0.59298(17) 0.52603(18) 0.4621(3) 0.0514(7) Uani 1 1 d . . . 
H34 H 0.5906 0.5759 0.4739 0.062 Uiso 1 1 calc R . . 
C35 C 0.65472(19) 0.4949(2) 0.4248(3) 0.0588(9) Uani 1 1 d . . . 
H35 H 0.6939 0.5249 0.4118 0.071 Uiso 1 1 calc R . . 
N31 N 0.66298(16) 0.42593(18) 0.4058(3) 0.0657(8) Uani 1 1 d . . . 
B1 B 0.53757(14) 0.76009(14) 0.3725(3) 0.0317(5) Uani 1 1 d . . . 
F1 F 0.58489(9) 0.70808(9) 0.40817(17) 0.0534(4) Uani 1 1 d . . . 
F2 F 0.53388(14) 0.76329(12) 0.24401(17) 0.0733(6) Uani 1 1 d . . . 
F3 F 0.55753(10) 0.82437(9) 0.41909(19) 0.0609(5) Uani 1 1 d . . . 
F4 F 0.47233(9) 0.74317(10) 0.4171(2) 0.0626(5) Uani 1 1 d . . . 
O1 O 0.7500 0.278(3) 0.5000 0.108(13) Uiso 0.13 2 d SP . . 
O2 O 0.7531(19) 0.261(2) 0.427(4) 0.116(11) Uiso 0.12 1 d P . . 
O3 O 0.722(4) 0.285(4) 0.356(7) 0.12(2) Uiso 0.06 1 d P . . 
  
loop_ 
 _atom_site_aniso_label 
 _atom_site_aniso_U_11 
 _atom_site_aniso_U_22 
 _atom_site_aniso_U_33 
 _atom_site_aniso_U_23 
 _atom_site_aniso_U_13 
 _atom_site_aniso_U_12 
Cd1 0.02335(13) 0.03245(14) 0.02873(14) 0.000 0.00018(9) 0.000 
C1 0.0305(12) 0.0324(12) 0.0323(12) 0.0041(9) -0.0049(9) -0.0035(10) 
C2 0.0328(12) 0.0411(14) 0.0357(13) 0.0068(10) -0.0026(10) -0.0122(11) 
C3 0.0262(11) 0.0485(15) 0.0311(12) 0.0025(10) 0.0009(9) -0.0055(10) 
C4 0.0260(11) 0.0395(13) 0.0291(11) -0.0007(9) -0.0012(9) 0.0003(10) 
C5 0.0244(10) 0.0324(12) 0.0239(10) 0.0032(8) -0.0030(8) -0.0012(9) 
C6 0.0370(13) 0.0322(12) 0.0424(14) 0.0052(10) -0.0020(11) -0.0055(10) 
C7 0.0238(10) 0.0279(11) 0.0345(12) 0.0033(9) -0.0026(9) 0.0019(9) 
C11 0.0406(14) 0.0340(13) 0.0574(17) -0.0049(12) -0.0096(12) -0.0060(11) 
C12 0.0503(17) 0.0506(17) 0.0504(17) -0.0143(13) -0.0090(13) -0.0042(14) 
C13 0.0417(14) 0.0480(16) 0.0423(14) -0.0070(12) -0.0022(11) -0.0035(12) 
C21 0.0346(12) 0.0285(11) 0.0317(11) -0.0019(9) 0.0013(9) -0.0016(9) 
C22 0.0342(12) 0.0390(13) 0.0320(12) -0.0021(10) -0.0058(10) -0.0013(10) 
C23 0.0254(11) 0.0401(13) 0.0370(12) -0.0015(10) -0.0044(9) 0.0020(10) 
N1 0.0257(9) 0.0289(10) 0.0297(10) 0.0033(7) -0.0037(8) -0.0018(8) 
N11 0.0322(10) 0.0390(12) 0.0390(11) -0.0005(9) 0.0016(9) -0.0042(9) 
N12 0.0335(11) 0.0316(11) 0.0431(12) 0.0002(9) -0.0026(9) -0.0035(8) 
N21 0.0240(9) 0.0357(11) 0.0334(10) -0.0019(8) 0.0004(8) 0.0025(8) 
N22 0.0222(9) 0.0268(9) 0.0318(10) 0.0010(7) 0.0002(7) -0.0004(7) 
C31 0.095(3) 0.051(2) 0.078(3) 0.0227(18) 0.029(2) 0.020(2) 
C32 0.074(2) 0.0489(18) 0.075(2) 0.0269(17) 0.0270(19) 0.0069(17) 
C33 0.0582(18) 0.0477(16) 0.0302(13) 0.0141(11) -0.0012(12) 0.0042(13) 
C34 0.0532(17) 0.0562(18) 0.0445(16) -0.0021(13) -0.0126(14) -0.0026(14) 
C35 0.0502(19) 0.076(2) 0.0501(18) 0.0055(16) -0.0083(15) -0.0009(16) 
N31 0.0652(18) 0.079(2) 0.0530(16) 0.0204(15) 0.0111(13) 0.0159(16) 
B1 0.0309(13) 0.0284(13) 0.0358(14) -0.0047(10) -0.0007(11) 0.0034(10) 
F1 0.0442(9) 0.0486(10) 0.0676(11) 0.0080(8) 0.0053(8) 0.0209(8) 
F2 0.1069(17) 0.0744(14) 0.0383(10) -0.0038(9) -0.0049(10) 0.0227(12) 
F3 0.0662(12) 0.0351(9) 0.0809(13) -0.0094(8) -0.0353(10) -0.0033(8) 
F4 0.0361(9) 0.0548(11) 0.0968(15) 0.0132(10) 0.0068(9) 0.0013(8) 
  
_geom_special_details 
; 
 All esds (except the esd in the dihedral angle between two l.s. planes) 
 are estimated using the full covariance matrix.  The cell esds are taken 
 into account individually in the estimation of esds in distances, angles 
 and torsion angles; correlations between esds in cell parameters are only 
 used when they are defined by crystal symmetry.  An approximate (isotropic) 
 treatment of cell esds is used for estimating esds involving l.s. planes. 
; 
  
loop_ 
 _geom_bond_atom_site_label_1 
 _geom_bond_atom_site_label_2 
 _geom_bond_distance 
 _geom_bond_site_symmetry_2 
 _geom_bond_publ_flag 
Cd1 N11 2.335(2) . ? 
Cd1 N11 2.335(2) 2_655 ? 
Cd1 N21 2.344(2) . ? 
Cd1 N21 2.344(2) 2_655 ? 
Cd1 N1 2.421(2) . ? 
Cd1 N1 2.421(2) 2_655 ? 
C1 N1 1.354(3) . ? 
C1 C2 1.385(4) . ? 
C1 C6 1.508(4) . ? 
C2 C3 1.375(4) . ? 
C2 H2 0.9500 . ? 
C3 C4 1.377(4) . ? 
C3 H3 0.9500 . ? 
C4 C5 1.388(3) . ? 
C4 H4 0.9500 . ? 
C5 N1 1.346(3) . ? 
C5 C7 1.506(3) . ? 
C6 N12 1.453(3) . ? 
C6 H6A 0.9900 . ? 
C6 H6B 0.9900 . ? 
C7 N22 1.463(3) . ? 
C7 H7A 0.9900 . ? 
C7 H7B 0.9900 . ? 
C11 N12 1.351(3) . ? 
C11 C12 1.373(4) . ? 
C11 H11 0.9500 . ? 
C12 C13 1.390(4) . ? 
C12 H12 0.9500 . ? 
C13 N11 1.351(3) . ? 
C13 H13 0.9500 . ? 
C21 N22 1.344(3) . ? 
C21 C22 1.367(3) . ? 
C21 H21 0.9500 . ? 
C22 C23 1.392(4) . ? 
C22 H22 0.9500 . ? 
C23 N21 1.332(3) . ? 
C23 H23 0.9500 . ? 
N11 N12 1.363(3) . ? 
N21 N22 1.359(3) . ? 
C31 N31 1.323(5) . ? 
C31 C32 1.387(5) . ? 
C31 H31 0.9500 . ? 
C32 C33 1.379(5) . ? 
C32 H32 0.9500 . ? 
C33 C34 1.390(5) . ? 
C33 C33 1.488(6) 5_666 ? 
C34 C35 1.380(5) . ? 
C34 H34 0.9500 . ? 
C35 N31 1.324(5) . ? 
C35 H35 0.9500 . ? 
B1 F3 1.364(3) . ? 
B1 F4 1.377(3) . ? 
B1 F2 1.377(3) . ? 
B1 F1 1.387(3) . ? 
O1 O2 0.84(4) . ? 
O1 O2 0.84(4) 2_656 ? 
O1 O3 1.64(7) . ? 
O1 O3 1.64(7) 2_656 ? 
O2 O3 1.07(7) . ? 
O2 O2 1.56(8) 2_656 ? 
  
loop_ 
 _geom_angle_atom_site_label_1 
 _geom_angle_atom_site_label_2 
 _geom_angle_atom_site_label_3 
 _geom_angle 
 _geom_angle_site_symmetry_1 
 _geom_angle_site_symmetry_3 
 _geom_angle_publ_flag 
N11 Cd1 N11 89.43(11) . 2_655 ? 
N11 Cd1 N21 157.75(7) . . ? 
N11 Cd1 N21 91.40(7) 2_655 . ? 
N11 Cd1 N21 91.40(7) . 2_655 ? 
N11 Cd1 N21 157.75(7) 2_655 2_655 ? 
N21 Cd1 N21 96.12(10) . 2_655 ? 
N11 Cd1 N1 79.72(7) . . ? 
N11 Cd1 N1 105.04(7) 2_655 . ? 
N21 Cd1 N1 78.59(7) . . ? 
N21 Cd1 N1 96.98(7) 2_655 . ? 
N11 Cd1 N1 105.04(7) . 2_655 ? 
N11 Cd1 N1 79.72(7) 2_655 2_655 ? 
N21 Cd1 N1 96.98(7) . 2_655 ? 
N21 Cd1 N1 78.59(7) 2_655 2_655 ? 
N1 Cd1 N1 173.46(9) . 2_655 ? 
N1 C1 C2 122.2(2) . . ? 
N1 C1 C6 117.1(2) . . ? 
C2 C1 C6 120.7(2) . . ? 
C3 C2 C1 119.2(2) . . ? 
C3 C2 H2 120.4 . . ? 
C1 C2 H2 120.4 . . ? 
C2 C3 C4 119.2(2) . . ? 
C2 C3 H3 120.4 . . ? 
C4 C3 H3 120.4 . . ? 
C3 C4 C5 119.1(2) . . ? 
C3 C4 H4 120.5 . . ? 
C5 C4 H4 120.5 . . ? 
N1 C5 C4 122.3(2) . . ? 
N1 C5 C7 117.41(19) . . ? 
C4 C5 C7 120.2(2) . . ? 
N12 C6 C1 112.8(2) . . ? 
N12 C6 H6A 109.0 . . ? 
C1 C6 H6A 109.0 . . ? 
N12 C6 H6B 109.0 . . ? 
C1 C6 H6B 109.0 . . ? 
H6A C6 H6B 107.8 . . ? 
N22 C7 C5 112.11(18) . . ? 
N22 C7 H7A 109.2 . . ? 
C5 C7 H7A 109.2 . . ? 
N22 C7 H7B 109.2 . . ? 
C5 C7 H7B 109.2 . . ? 
H7A C7 H7B 107.9 . . ? 
N12 C11 C12 107.2(2) . . ? 
N12 C11 H11 126.4 . . ? 
C12 C11 H11 126.4 . . ? 
C11 C12 C13 105.7(3) . . ? 
C11 C12 H12 127.2 . . ? 
C13 C12 H12 127.2 . . ? 
N11 C13 C12 110.9(3) . . ? 
N11 C13 H13 124.6 . . ? 
C12 C13 H13 124.6 . . ? 
N22 C21 C22 107.6(2) . . ? 
N22 C21 H21 126.2 . . ? 
C22 C21 H21 126.2 . . ? 
C21 C22 C23 104.8(2) . . ? 
C21 C22 H22 127.6 . . ? 
C23 C22 H22 127.6 . . ? 
N21 C23 C22 111.6(2) . . ? 
N21 C23 H23 124.2 . . ? 
C22 C23 H23 124.2 . . ? 
C5 N1 C1 117.9(2) . . ? 
C5 N1 Cd1 121.08(15) . . ? 
C1 N1 Cd1 120.71(16) . . ? 
C13 N11 N12 104.8(2) . . ? 
C13 N11 Cd1 134.86(18) . . ? 
N12 N11 Cd1 120.38(15) . . ? 
C11 N12 N11 111.5(2) . . ? 
C11 N12 C6 127.8(2) . . ? 
N11 N12 C6 120.7(2) . . ? 
C23 N21 N22 104.68(19) . . ? 
C23 N21 Cd1 133.48(17) . . ? 
N22 N21 Cd1 119.96(14) . . ? 
C21 N22 N21 111.34(19) . . ? 
C21 N22 C7 128.4(2) . . ? 
N21 N22 C7 120.22(18) . . ? 
N31 C31 C32 125.1(4) . . ? 
N31 C31 H31 117.4 . . ? 
C32 C31 H31 117.4 . . ? 
C33 C32 C31 119.2(4) . . ? 
C33 C32 H32 120.4 . . ? 
C31 C32 H32 120.4 . . ? 
C32 C33 C34 116.1(3) . . ? 
C32 C33 C33 121.9(4) . 5_666 ? 
C34 C33 C33 121.9(3) . 5_666 ? 
C35 C34 C33 119.9(3) . . ? 
C35 C34 H34 120.0 . . ? 
C33 C34 H34 120.0 . . ? 
N31 C35 C34 124.4(4) . . ? 
N31 C35 H35 117.8 . . ? 
C34 C35 H35 117.8 . . ? 
C31 N31 C35 115.3(3) . . ? 
F3 B1 F4 109.4(2) . . ? 
F3 B1 F2 109.8(2) . . ? 
F4 B1 F2 108.3(2) . . ? 
F3 B1 F1 110.2(2) . . ? 
F4 B1 F1 109.5(2) . . ? 
F2 B1 F1 109.6(2) . . ? 
O2 O1 O2 136(10) . 2_656 ? 
O2 O1 O3 35(4) . . ? 
O2 O1 O3 151(5) 2_656 . ? 
O2 O1 O3 151(5) . 2_656 ? 
O2 O1 O3 35(4) 2_656 2_656 ? 
O3 O1 O3 171(6) . 2_656 ? 
O1 O2 O3 118(6) . . ? 
O1 O2 O2 22(5) . 2_656 ? 
O3 O2 O2 132(6) . 2_656 ? 
O2 O3 O1 27(3) . . ? 
  
loop_ 
 _geom_torsion_atom_site_label_1 
 _geom_torsion_atom_site_label_2 
 _geom_torsion_atom_site_label_3 
 _geom_torsion_atom_site_label_4 
 _geom_torsion 
 _geom_torsion_site_symmetry_1 
 _geom_torsion_site_symmetry_2 
 _geom_torsion_site_symmetry_3 
 _geom_torsion_site_symmetry_4 
 _geom_torsion_publ_flag 
N1 C1 C2 C3 -1.2(4) . . . . ? 
C6 C1 C2 C3 176.9(2) . . . . ? 
C1 C2 C3 C4 -0.8(4) . . . . ? 
C2 C3 C4 C5 1.4(3) . . . . ? 
C3 C4 C5 N1 -0.1(3) . . . . ? 
C3 C4 C5 C7 -179.8(2) . . . . ? 
N1 C1 C6 N12 -69.9(3) . . . . ? 
C2 C1 C6 N12 111.8(3) . . . . ? 
N1 C5 C7 N22 -57.7(3) . . . . ? 
C4 C5 C7 N22 122.0(2) . . . . ? 
N12 C11 C12 C13 -0.5(3) . . . . ? 
C11 C12 C13 N11 0.2(3) . . . . ? 
N22 C21 C22 C23 -0.6(3) . . . . ? 
C21 C22 C23 N21 0.3(3) . . . . ? 
C4 C5 N1 C1 -1.9(3) . . . . ? 
C7 C5 N1 C1 177.90(19) . . . . ? 
C4 C5 N1 Cd1 171.83(16) . . . . ? 
C7 C5 N1 Cd1 -8.4(3) . . . . ? 
C2 C1 N1 C5 2.5(3) . . . . ? 
C6 C1 N1 C5 -175.7(2) . . . . ? 
C2 C1 N1 Cd1 -171.18(18) . . . . ? 
C6 C1 N1 Cd1 10.6(3) . . . . ? 
N11 Cd1 N1 C5 -141.86(17) . . . . ? 
N11 Cd1 N1 C5 131.54(16) 2_655 . . . ? 
N21 Cd1 N1 C5 43.16(16) . . . . ? 
N21 Cd1 N1 C5 -51.70(17) 2_655 . . . ? 
N1 Cd1 N1 C5 -4.66(16) 2_655 . . . ? 
N11 Cd1 N1 C1 31.64(17) . . . . ? 
N11 Cd1 N1 C1 -54.96(18) 2_655 . . . ? 
N21 Cd1 N1 C1 -143.33(18) . . . . ? 
N21 Cd1 N1 C1 121.80(17) 2_655 . . . ? 
N1 Cd1 N1 C1 168.84(17) 2_655 . . . ? 
C12 C13 N11 N12 0.1(3) . . . . ? 
C12 C13 N11 Cd1 178.9(2) . . . . ? 
N11 Cd1 N11 C13 -111.2(3) 2_655 . . . ? 
N21 Cd1 N11 C13 156.5(2) . . . . ? 
N21 Cd1 N11 C13 46.5(3) 2_655 . . . ? 
N1 Cd1 N11 C13 143.4(3) . . . . ? 
N1 Cd1 N11 C13 -32.0(3) 2_655 . . . ? 
N11 Cd1 N11 N12 67.42(17) 2_655 . . . ? 
N21 Cd1 N11 N12 -24.9(3) . . . . ? 
N21 Cd1 N11 N12 -134.82(18) 2_655 . . . ? 
N1 Cd1 N11 N12 -37.98(17) . . . . ? 
N1 Cd1 N11 N12 146.61(17) 2_655 . . . ? 
C12 C11 N12 N11 0.6(3) . . . . ? 
C12 C11 N12 C6 179.8(2) . . . . ? 
C13 N11 N12 C11 -0.4(3) . . . . ? 
Cd1 N11 N12 C11 -179.44(17) . . . . ? 
C13 N11 N12 C6 -179.7(2) . . . . ? 
Cd1 N11 N12 C6 1.3(3) . . . . ? 
C1 C6 N12 C11 -115.1(3) . . . . ? 
C1 C6 N12 N11 64.0(3) . . . . ? 
C22 C23 N21 N22 0.1(3) . . . . ? 
C22 C23 N21 Cd1 -163.68(18) . . . . ? 
N11 Cd1 N21 C23 117.7(3) . . . . ? 
N11 Cd1 N21 C23 25.8(2) 2_655 . . . ? 
N21 Cd1 N21 C23 -133.2(3) 2_655 . . . ? 
N1 Cd1 N21 C23 130.9(2) . . . . ? 
N1 Cd1 N21 C23 -54.0(2) 2_655 . . . ? 
N11 Cd1 N21 N22 -44.1(3) . . . . ? 
N11 Cd1 N21 N22 -135.95(17) 2_655 . . . ? 
N21 Cd1 N21 N22 65.02(15) 2_655 . . . ? 
N1 Cd1 N21 N22 -30.89(16) . . . . ? 
N1 Cd1 N21 N22 144.23(16) 2_655 . . . ? 
C22 C21 N22 N21 0.7(3) . . . . ? 
C22 C21 N22 C7 -178.7(2) . . . . ? 
C23 N21 N22 C21 -0.5(3) . . . . ? 
Cd1 N21 N22 C21 165.98(15) . . . . ? 
C23 N21 N22 C7 179.0(2) . . . . ? 
Cd1 N21 N22 C7 -14.6(3) . . . . ? 
C5 C7 N22 C21 -106.8(3) . . . . ? 
C5 C7 N22 N21 73.9(3) . . . . ? 
N31 C31 C32 C33 0.0(6) . . . . ? 
C31 C32 C33 C34 -0.8(5) . . . . ? 
C31 C32 C33 C33 177.5(4) . . . 5_666 ? 
C32 C33 C34 C35 0.8(4) . . . . ? 
C33 C33 C34 C35 -177.5(3) 5_666 . . . ? 
C33 C34 C35 N31 0.0(5) . . . . ? 
C32 C31 N31 C35 0.8(6) . . . . ? 
C34 C35 N31 C31 -0.8(5) . . . . ? 
O2 O1 O2 O3 136(7) 2_656 . . . ? 
O3 O1 O2 O3 -167(10) 2_656 . . . ? 
O3 O1 O2 O2 -136(7) . . . 2_656 ? 
O3 O1 O2 O2 56(12) 2_656 . . 2_656 ? 
O2 O2 O3 O1 20(4) 2_656 . . . ? 
O2 O1 O3 O2 -91(18) 2_656 . . . ? 
O3 O1 O3 O2 140(7) 2_656 . . . ? 
  
_diffrn_measured_fraction_theta_max    0.999 
_diffrn_reflns_theta_full              26.43 
_diffrn_measured_fraction_theta_full   0.999 
_refine_diff_density_max    1.331 
_refine_diff_density_min   -0.876 
_refine_diff_density_rms    0.070 

#===END

data_cmpd5 
 
_audit_creation_method            SHELXL-97 
_chemical_name_systematic 
; 
 ? 
; 
_chemical_name_common             ? 
_chemical_melting_point           ? 
_chemical_formula_moiety          
;
[Cd (C12 H8 N2)3]2 (C13 H13 N5) (B F4)4 (H2 O)5
;
_chemical_formula_sum 
 'C85 H71 B4 Cd2 F16 N17 O5' 
_chemical_formula_weight          1982.63 
 
loop_ 
 _atom_type_symbol 
 _atom_type_description 
 _atom_type_scat_dispersion_real 
 _atom_type_scat_dispersion_imag 
 _atom_type_scat_source 
 'C'  'C'   0.0033   0.0016 
 'International Tables Vol C Tables 4.2.6.8 and 6.1.1.4' 
 'H'  'H'   0.0000   0.0000 
 'International Tables Vol C Tables 4.2.6.8 and 6.1.1.4' 
 'B'  'B'   0.0013   0.0007 
 'International Tables Vol C Tables 4.2.6.8 and 6.1.1.4' 
 'N'  'N'   0.0061   0.0033 
 'International Tables Vol C Tables 4.2.6.8 and 6.1.1.4' 
 'O'  'O'   0.0106   0.0060 
 'International Tables Vol C Tables 4.2.6.8 and 6.1.1.4' 
 'F'  'F'   0.0171   0.0103 
 'International Tables Vol C Tables 4.2.6.8 and 6.1.1.4' 
 'Cd'  'Cd'  -0.8075   1.2024 
 'International Tables Vol C Tables 4.2.6.8 and 6.1.1.4' 
 
_symmetry_cell_setting            Monoclinic
_symmetry_space_group_name_H-M    'P c'
 
loop_ 
 _symmetry_equiv_pos_as_xyz 
 'x, y, z' 
 'x, -y, z+1/2' 
 
_cell_length_a                    13.0114(7) 
_cell_length_b                    17.3285(9) 
_cell_length_c                    18.8523(10) 
_cell_angle_alpha                 90.00 
_cell_angle_beta                  102.8160(10) 
_cell_angle_gamma                 90.00 
_cell_volume                      4144.7(4) 
_cell_formula_units_Z             2 
_cell_measurement_temperature     150(2) 
_cell_measurement_reflns_used     7159
_cell_measurement_theta_min       2.216
_cell_measurement_theta_max       25.099
 
_exptl_crystal_description        plate
_exptl_crystal_colour             orange
_exptl_crystal_size_max           0.42 
_exptl_crystal_size_mid           0.18 
_exptl_crystal_size_min           0.06 
_exptl_crystal_density_meas       ? 
_exptl_crystal_density_diffrn     1.589 
_exptl_crystal_density_method     'not measured' 
_exptl_crystal_F_000              2000 
_exptl_absorpt_coefficient_mu     0.614 
_exptl_absorpt_correction_type    ? 
_exptl_absorpt_correction_T_min   0.7765
_exptl_absorpt_correction_T_max   1.0000 
_exptl_absorpt_process_details    ? 
 
_exptl_special_details 
; 
 ? 
; 
 
_diffrn_ambient_temperature       150(2) 
_diffrn_radiation_wavelength      0.71073 
_diffrn_radiation_type            MoK\a 
_diffrn_radiation_source          'fine-focus sealed tube' 
_diffrn_radiation_monochromator   graphite 
_diffrn_measurement_device_type   ? 
_diffrn_measurement_method        ? 
_diffrn_detector_area_resol_mean  ? 
_diffrn_standards_number          ? 
_diffrn_standards_interval_count  ? 
_diffrn_standards_interval_time   ? 
_diffrn_standards_decay_%         none
_diffrn_reflns_number             30953 
_diffrn_reflns_av_R_equivalents   0.0321 
_diffrn_reflns_av_sigmaI/netI     0.0458 
_diffrn_reflns_limit_h_min        -14 
_diffrn_reflns_limit_h_max        15 
_diffrn_reflns_limit_k_min        -20 
_diffrn_reflns_limit_k_max        20 
_diffrn_reflns_limit_l_min        -22 
_diffrn_reflns_limit_l_max        22 
_diffrn_reflns_theta_min          1.61 
_diffrn_reflns_theta_max          25.10 
_reflns_number_total              13153 
_reflns_number_gt                 12668 
_reflns_threshold_expression      >2sigma(I) 
 
_computing_data_collection        ? 
_computing_cell_refinement        ? 
_computing_data_reduction         ? 
_computing_structure_solution     'SHELXS-97 (Sheldrick, 1997)' 
_computing_structure_refinement   'SHELXL-97 (Sheldrick, 1997)' 
_computing_molecular_graphics     ? 
_computing_publication_material   ? 
 
_refine_special_details 
; 
 Refinement of F^2^ against ALL reflections.  The weighted R-factor wR and 
 goodness of fit S are based on F^2^, conventional R-factors R are based 
 on F, with F set to zero for negative F^2^. The threshold expression of 
 F^2^ > 2sigma(F^2^) is used only for calculating R-factors(gt) etc. and is 
 not relevant to the choice of reflections for refinement.  R-factors based 
 on F^2^ are statistically about twice as large as those based on F, and R- 
 factors based on ALL data will be even larger. 
; 
 
_refine_ls_structure_factor_coef  Fsqd  
_refine_ls_matrix_type            full 
_refine_ls_weighting_scheme       calc  
_refine_ls_weighting_details 
 'calc w=1/[\s^2^(Fo^2^)+(0.0326P)^2^+1.1594P] where P=(Fo^2^+2Fc^2^)/3' 
_atom_sites_solution_primary      direct 
_atom_sites_solution_secondary    difmap 
_atom_sites_solution_hydrogens    geom
_refine_ls_hydrogen_treatment     mixed
_refine_ls_extinction_method      none 
_refine_ls_extinction_coef        ? 
_refine_ls_abs_structure_details 
 'Flack H D (1983), Acta Cryst. A39, 876-881' 
_refine_ls_abs_structure_Flack    -0.015(12) 
_refine_ls_number_reflns          13153 
_refine_ls_number_parameters      1284 
_refine_ls_number_restraints      73 
_refine_ls_R_factor_all           0.0347 
_refine_ls_R_factor_gt            0.0331 
_refine_ls_wR_factor_ref          0.0750 
_refine_ls_wR_factor_gt           0.0742 
_refine_ls_goodness_of_fit_ref    1.052 
_refine_ls_restrained_S_all       1.052 
_refine_ls_shift/su_max           0.001 
_refine_ls_shift/su_mean          0.000 
 
loop_ 
 _atom_site_label 
 _atom_site_type_symbol 
 _atom_site_fract_x 
 _atom_site_fract_y 
 _atom_site_fract_z 
 _atom_site_U_iso_or_equiv 
 _atom_site_adp_type 
 _atom_site_occupancy 
 _atom_site_symmetry_multiplicity 
 _atom_site_calc_flag 
 _atom_site_refinement_flags 
 _atom_site_disorder_assembly 
 _atom_site_disorder_group 
Cd1 Cd 0.148770(18) 0.345803(14) 0.210564(13) 0.02434(7) Uani 1 1 d . . . 
C1 C 0.3262(4) 0.4348(2) 0.3336(2) 0.0314(9) Uani 1 1 d . . . 
H1 H 0.2812 0.4218 0.3652 0.038 Uiso 1 1 calc R . . 
C2 C 0.4168(4) 0.4784(2) 0.3612(2) 0.0398(11) Uani 1 1 d . . . 
H2 H 0.4327 0.4946 0.4106 0.048 Uiso 1 1 calc R . . 
C3 C 0.4820(4) 0.4972(2) 0.3164(2) 0.0415(11) Uani 1 1 d . . . 
H3 H 0.5431 0.5275 0.3343 0.050 Uiso 1 1 calc R . . 
C4 C 0.4591(3) 0.4722(2) 0.2438(2) 0.0299(9) Uani 1 1 d . . . 
C5 C 0.5251(4) 0.4880(2) 0.1946(3) 0.0386(11) Uani 1 1 d . . . 
H5 H 0.5874 0.5176 0.2105 0.046 Uiso 1 1 calc R . . 
C6 C 0.5004(4) 0.4614(2) 0.1250(2) 0.0394(10) Uani 1 1 d . . . 
H6 H 0.5458 0.4724 0.0932 0.047 Uiso 1 1 calc R . . 
C7 C 0.4072(3) 0.4173(2) 0.0992(2) 0.0293(9) Uani 1 1 d . . . 
C8 C 0.3811(4) 0.3865(2) 0.0287(2) 0.0355(10) Uani 1 1 d . . . 
H8 H 0.4255 0.3956 -0.0042 0.043 Uiso 1 1 calc R . . 
C9 C 0.2913(4) 0.3433(2) 0.0073(2) 0.0344(10) Uani 1 1 d . . . 
H9 H 0.2729 0.3217 -0.0401 0.041 Uiso 1 1 calc R . . 
C10 C 0.2276(4) 0.3318(2) 0.0569(2) 0.0308(9) Uani 1 1 d . . . 
H10 H 0.1649 0.3025 0.0416 0.037 Uiso 1 1 calc R . . 
C11 C 0.3387(3) 0.40151(19) 0.1460(2) 0.0239(8) Uani 1 1 d . . . 
C12 C 0.3649(3) 0.4289(2) 0.2198(2) 0.0250(8) Uani 1 1 d . . . 
C13 C 0.2602(4) 0.2111(3) 0.3274(2) 0.0343(10) Uani 1 1 d . . . 
H13 H 0.3005 0.2528 0.3518 0.041 Uiso 1 1 calc R . . 
C14 C 0.2803(4) 0.1361(2) 0.3563(2) 0.0373(10) Uani 1 1 d . . . 
H14 H 0.3336 0.1277 0.3990 0.045 Uiso 1 1 calc R . . 
C15 C 0.2226(4) 0.0763(2) 0.3223(2) 0.0384(10) Uani 1 1 d . . . 
H15 H 0.2352 0.0255 0.3412 0.046 Uiso 1 1 calc R . . 
C16 C 0.1436(3) 0.0896(2) 0.2588(2) 0.0306(9) Uani 1 1 d . . . 
C17 C 0.0775(4) 0.0298(2) 0.2211(2) 0.0389(10) Uani 1 1 d . . . 
H17 H 0.0894 -0.0221 0.2370 0.047 Uiso 1 1 calc R . . 
C18 C -0.0005(4) 0.0455(2) 0.1642(2) 0.0393(10) Uani 1 1 d . . . 
H18 H -0.0421 0.0044 0.1398 0.047 Uiso 1 1 calc R . . 
C19 C -0.0232(4) 0.1228(2) 0.1388(2) 0.0325(10) Uani 1 1 d . . . 
C20 C -0.1087(4) 0.1422(2) 0.0829(2) 0.0383(10) Uani 1 1 d . . . 
H20 H -0.1541 0.1030 0.0582 0.046 Uiso 1 1 calc R . . 
C21 C -0.1268(4) 0.2174(2) 0.0637(2) 0.0344(9) Uani 1 1 d . . . 
H21 H -0.1864 0.2313 0.0269 0.041 Uiso 1 1 calc R . . 
C22 C -0.0581(3) 0.2737(2) 0.0981(2) 0.0306(9) Uani 1 1 d . . . 
H22 H -0.0710 0.3259 0.0834 0.037 Uiso 1 1 calc R . . 
C23 C 0.0425(3) 0.1832(2) 0.17280(19) 0.0258(8) Uani 1 1 d . . . 
C24 C 0.1279(3) 0.1667(2) 0.2342(2) 0.0260(8) Uani 1 1 d . . . 
C25 C 0.0375(4) 0.3421(2) 0.3508(2) 0.0305(11) Uani 1 1 d . . . 
H25 H 0.0881 0.3028 0.3671 0.037 Uiso 1 1 calc R . . 
C26 C -0.0369(4) 0.3574(2) 0.3917(2) 0.0350(11) Uani 1 1 d . . . 
H26 H -0.0388 0.3282 0.4340 0.042 Uiso 1 1 calc R . . 
C27 C -0.1075(4) 0.4159(2) 0.3692(2) 0.0364(10) Uani 1 1 d . . . 
H27 H -0.1577 0.4284 0.3971 0.044 Uiso 1 1 calc R . . 
C28 C -0.1067(3) 0.4574(2) 0.3056(2) 0.0305(9) Uani 1 1 d . . . 
C29 C -0.1772(3) 0.5189(2) 0.2793(2) 0.0384(10) Uani 1 1 d . . . 
H29 H -0.2285 0.5330 0.3057 0.046 Uiso 1 1 calc R . . 
C30 C -0.1734(4) 0.5576(3) 0.2183(2) 0.0386(11) Uani 1 1 d . . . 
H30 H -0.2222 0.5981 0.2022 0.046 Uiso 1 1 calc R . . 
C31 C -0.0957(3) 0.5383(2) 0.1769(2) 0.0304(9) Uani 1 1 d . . . 
C32 C -0.0858(4) 0.5777(2) 0.1144(2) 0.0374(10) Uani 1 1 d . . . 
H32 H -0.1321 0.6193 0.0968 0.045 Uiso 1 1 calc R . . 
C33 C -0.0101(4) 0.5571(2) 0.0784(2) 0.0368(11) Uani 1 1 d . . . 
H33 H -0.0019 0.5843 0.0363 0.044 Uiso 1 1 calc R . . 
C34 C 0.0549(4) 0.4947(2) 0.1050(2) 0.0325(10) Uani 1 1 d . . . 
H34 H 0.1073 0.4802 0.0796 0.039 Uiso 1 1 calc R . . 
C35 C -0.0262(3) 0.4765(2) 0.20048(19) 0.0252(8) Uani 1 1 d . . . 
C36 C -0.0299(3) 0.4361(2) 0.26683(19) 0.0248(8) Uani 1 1 d . . . 
N1 N 0.3006(3) 0.41099(16) 0.26534(16) 0.0253(7) Uani 1 1 d . . . 
N2 N 0.2496(3) 0.35943(17) 0.12402(17) 0.0255(7) Uani 1 1 d . . . 
N3 N 0.1873(3) 0.22595(18) 0.26751(16) 0.0277(7) Uani 1 1 d . . . 
N4 N 0.0252(3) 0.25782(17) 0.15084(16) 0.0257(7) Uani 1 1 d . . . 
N5 N 0.0412(3) 0.37983(18) 0.29013(16) 0.0260(7) Uani 1 1 d . . . 
N6 N 0.0478(3) 0.45465(17) 0.16365(17) 0.0267(7) Uani 1 1 d . . . 
Cd2 Cd 0.84313(2) 0.832752(14) 0.283749(15) 0.02888(8) Uani 1 1 d . . . 
C37 C 0.9838(4) 0.8242(3) 0.1585(3) 0.0379(12) Uani 1 1 d . . . 
H37 H 0.9422 0.8673 0.1386 0.046 Uiso 1 1 calc R . . 
C38 C 1.0600(4) 0.7981(3) 0.1235(2) 0.0480(13) Uani 1 1 d . . . 
H38 H 1.0695 0.8232 0.0806 0.058 Uiso 1 1 calc R . . 
C39 C 1.1206(4) 0.7373(3) 0.1501(3) 0.0470(12) Uani 1 1 d . . . 
H39 H 1.1727 0.7191 0.1260 0.056 Uiso 1 1 calc R . . 
C40 C 1.1061(4) 0.7010(2) 0.2138(2) 0.0346(9) Uani 1 1 d . . . 
C41 C 1.1655(4) 0.6350(2) 0.2456(3) 0.0408(11) Uani 1 1 d . . . 
H41 H 1.2186 0.6146 0.2235 0.049 Uiso 1 1 calc R . . 
C42 C 1.1478(3) 0.6016(2) 0.3055(3) 0.0383(10) Uani 1 1 d . . . 
H42 H 1.1898 0.5587 0.3256 0.046 Uiso 1 1 calc R . . 
C43 C 1.0677(3) 0.6284(2) 0.3403(2) 0.0315(9) Uani 1 1 d . . . 
C44 C 1.0444(4) 0.5931(2) 0.4008(2) 0.0342(10) Uani 1 1 d . . . 
H44 H 1.0848 0.5501 0.4227 0.041 Uiso 1 1 calc R . . 
C45 C 0.9625(4) 0.6205(2) 0.4292(2) 0.0369(10) Uani 1 1 d . . . 
H45 H 0.9451 0.5963 0.4702 0.044 Uiso 1 1 calc R . . 
C46 C 0.9061(4) 0.6839(2) 0.3968(2) 0.0329(9) Uani 1 1 d . . . 
H46 H 0.8491 0.7021 0.4162 0.039 Uiso 1 1 calc R . . 
C47 C 1.0071(3) 0.6935(2) 0.3108(2) 0.0273(8) Uani 1 1 d . . . 
C48 C 1.0262(3) 0.7304(2) 0.2461(2) 0.0289(9) Uani 1 1 d . . . 
C49 C 0.7110(4) 0.7425(2) 0.1366(2) 0.0348(10) Uani 1 1 d . . . 
H49 H 0.7674 0.7595 0.1160 0.042 Uiso 1 1 calc R . . 
C50 C 0.6362(4) 0.6939(2) 0.0958(2) 0.0401(10) Uani 1 1 d . . . 
H50 H 0.6427 0.6768 0.0492 0.048 Uiso 1 1 calc R . . 
C51 C 0.5527(4) 0.6708(2) 0.1238(2) 0.0373(10) Uani 1 1 d . . . 
H51 H 0.5002 0.6379 0.0963 0.045 Uiso 1 1 calc R . . 
C52 C 0.5447(3) 0.6958(2) 0.1931(2) 0.0333(9) Uani 1 1 d . . . 
C53 C 0.4594(4) 0.6756(2) 0.2251(2) 0.0360(10) Uani 1 1 d . . . 
H53 H 0.4054 0.6426 0.1995 0.043 Uiso 1 1 calc R . . 
C54 C 0.4537(4) 0.7027(2) 0.2914(2) 0.0392(10) Uani 1 1 d . . . 
H54 H 0.3956 0.6885 0.3115 0.047 Uiso 1 1 calc R . . 
C55 C 0.5328(3) 0.7518(2) 0.3317(2) 0.0319(9) Uani 1 1 d . . . 
C56 C 0.5291(4) 0.7823(2) 0.4001(2) 0.0374(10) Uani 1 1 d . . . 
H56 H 0.4727 0.7688 0.4222 0.045 Uiso 1 1 calc R . . 
C57 C 0.6065(4) 0.8316(3) 0.4353(2) 0.0378(11) Uani 1 1 d . . . 
H57 H 0.6026 0.8543 0.4805 0.045 Uiso 1 1 calc R . . 
C58 C 0.6918(4) 0.8476(2) 0.4028(2) 0.0351(10) Uani 1 1 d . . . 
H58 H 0.7459 0.8811 0.4272 0.042 Uiso 1 1 calc R . . 
C59 C 0.6209(3) 0.7714(2) 0.3032(2) 0.0282(9) Uani 1 1 d . . . 
C60 C 0.6259(3) 0.7436(2) 0.2314(2) 0.0286(9) Uani 1 1 d . . . 
C61 C 0.7133(4) 0.9792(3) 0.1981(2) 0.0390(10) Uani 1 1 d . . . 
H61 H 0.6730 0.9399 0.1696 0.047 Uiso 1 1 calc R . . 
C62 C 0.6865(4) 1.0560(3) 0.1813(3) 0.0434(11) Uani 1 1 d . . . 
H62 H 0.6286 1.0684 0.1426 0.052 Uiso 1 1 calc R . . 
C63 C 0.7445(4) 1.1127(2) 0.2210(3) 0.0445(12) Uani 1 1 d . . . 
H63 H 0.7284 1.1653 0.2093 0.053 Uiso 1 1 calc R . . 
C64 C 0.8283(4) 1.0936(2) 0.2794(2) 0.0363(10) Uani 1 1 d . . . 
C65 C 0.8931(4) 1.1489(2) 0.3240(3) 0.0468(12) Uani 1 1 d . . . 
H65 H 0.8795 1.2023 0.3147 0.056 Uiso 1 1 calc R . . 
C66 C 0.9723(4) 1.1284(2) 0.3786(3) 0.0434(11) Uani 1 1 d . . . 
H66 H 1.0150 1.1672 0.4061 0.052 Uiso 1 1 calc R . . 
C67 C 0.9945(4) 1.0487(2) 0.3965(2) 0.0335(10) Uani 1 1 d . . . 
C68 C 1.0733(4) 1.0242(3) 0.4549(2) 0.0434(11) Uani 1 1 d . . . 
H68 H 1.1172 1.0610 0.4844 0.052 Uiso 1 1 calc R . . 
C69 C 1.0875(4) 0.9475(3) 0.4698(2) 0.0445(11) Uani 1 1 d . . . 
H69 H 1.1404 0.9303 0.5098 0.053 Uiso 1 1 calc R . . 
C70 C 1.0227(4) 0.8952(2) 0.4251(2) 0.0389(10) Uani 1 1 d . . . 
H70 H 1.0336 0.8418 0.4354 0.047 Uiso 1 1 calc R . . 
C71 C 0.9317(3) 0.9922(2) 0.3544(2) 0.0293(9) Uani 1 1 d . . . 
C72 C 0.8477(3) 1.0136(2) 0.2938(2) 0.0294(8) Uani 1 1 d . . . 
N7 N 0.9660(3) 0.79185(18) 0.21867(17) 0.0297(8) Uani 1 1 d . . . 
N8 N 0.9278(3) 0.72062(18) 0.33987(17) 0.0285(8) Uani 1 1 d . . . 
N9 N 0.7082(3) 0.76661(18) 0.20272(17) 0.0293(8) Uani 1 1 d . . . 
N10 N 0.6995(3) 0.81760(18) 0.33958(17) 0.0290(8) Uani 1 1 d . . . 
N11 N 0.7925(3) 0.95831(18) 0.25209(17) 0.0308(8) Uani 1 1 d . . . 
N12 N 0.9470(3) 0.91510(18) 0.36903(18) 0.0295(7) Uani 1 1 d . . . 
C73 C 0.4121(4) 0.9691(2) 0.7290(2) 0.0329(9) Uani 1 1 d . . . 
C74 C 0.4818(4) 1.0035(2) 0.7863(2) 0.0388(11) Uani 1 1 d . . . 
H74 H 0.4819 1.0579 0.7927 0.047 Uiso 1 1 calc R . . 
C75 C 0.5508(4) 0.9578(3) 0.8339(2) 0.0446(12) Uani 1 1 d . . . 
H75 H 0.5993 0.9805 0.8736 0.054 Uiso 1 1 calc R . . 
C76 C 0.5498(4) 0.8787(2) 0.8241(2) 0.0378(10) Uani 1 1 d . . . 
H76 H 0.5969 0.8461 0.8565 0.045 Uiso 1 1 calc R . . 
C77 C 0.4779(4) 0.8488(2) 0.7654(2) 0.0297(9) Uani 1 1 d . . . 
C78 C 0.4710(3) 0.7628(2) 0.7498(2) 0.0326(9) Uani 1 1 d . . . 
H78A H 0.4777 0.7346 0.7963 0.039 Uiso 1 1 calc R . . 
H78B H 0.4006 0.7510 0.7191 0.039 Uiso 1 1 calc R . . 
C79 C 0.5533(4) 0.7438(2) 0.6425(2) 0.0356(10) Uani 1 1 d . . . 
H79 H 0.5025 0.7701 0.6067 0.043 Uiso 1 1 calc R . . 
C80 C 0.6423(4) 0.7075(2) 0.6321(2) 0.0388(11) Uani 1 1 d . . . 
H80 H 0.6666 0.7034 0.5884 0.047 Uiso 1 1 calc R . . 
C81 C 0.6887(4) 0.6781(2) 0.7002(3) 0.0415(12) Uani 1 1 d . . . 
H81 H 0.7521 0.6489 0.7098 0.050 Uiso 1 1 calc R . . 
C82 C 0.3340(4) 1.0158(2) 0.6754(2) 0.0394(10) Uani 1 1 d . . . 
H82A H 0.2794 0.9810 0.6475 0.047 Uiso 1 1 calc R . . 
H82B H 0.2988 1.0530 0.7021 0.047 Uiso 1 1 calc R . . 
C83 C 0.3878(6) 1.1348(3) 0.6158(3) 0.0694(19) Uani 1 1 d . . . 
H83 H 0.3588 1.1736 0.6412 0.083 Uiso 1 1 calc R . . 
C84 C 0.4419(7) 1.1454(3) 0.5624(3) 0.084(2) Uani 1 1 d . . . 
H84 H 0.4576 1.1933 0.5427 0.100 Uiso 1 1 calc R . . 
C85 C 0.4689(5) 1.0745(3) 0.5432(3) 0.0606(15) Uani 1 1 d . . . 
H85 H 0.5082 1.0651 0.5072 0.073 Uiso 1 1 calc R . . 
N13 N 0.4099(3) 0.89230(18) 0.71857(17) 0.0296(7) Uani 1 1 d . . . 
N14 N 0.6352(3) 0.69512(19) 0.7502(2) 0.0381(9) Uani 1 1 d . . . 
N15 N 0.5515(3) 0.73524(17) 0.71331(17) 0.0310(8) Uani 1 1 d . . . 
N16 N 0.4337(4) 1.0195(2) 0.5810(2) 0.0509(11) Uani 1 1 d . . . 
N17 N 0.3840(3) 1.05782(19) 0.62503(19) 0.0401(9) Uani 1 1 d . . . 
B1 B 0.2562(5) 0.3961(3) 0.5196(3) 0.0394(13) Uani 1 1 d D . . 
F11 F 0.2151(4) 0.32506(18) 0.50212(19) 0.0830(11) Uani 1 1 d D . . 
F12 F 0.3556(2) 0.4027(2) 0.50310(15) 0.0643(9) Uani 1 1 d D . . 
F13 F 0.1920(3) 0.45074(17) 0.48010(16) 0.0588(8) Uani 1 1 d D . . 
F14 F 0.2684(2) 0.40907(17) 0.59338(14) 0.0536(7) Uani 1 1 d . . . 
B2 B 0.2560(5) 0.8464(3) 0.3334(3) 0.0370(12) Uani 1 1 d . . . 
F21 F 0.1541(2) 0.87414(15) 0.31331(15) 0.0551(7) Uani 1 1 d . . . 
F22 F 0.2573(2) 0.77827(13) 0.37131(13) 0.0497(7) Uani 1 1 d . . . 
F23 F 0.3182(2) 0.90095(14) 0.37798(14) 0.0531(7) Uani 1 1 d . . . 
F24 F 0.2953(3) 0.83549(16) 0.27263(18) 0.0622(10) Uani 1 1 d . . . 
B3A B 0.6945(11) 0.5721(7) 0.4634(6) 0.034(4) Uani 0.60 1 d PD A 1 
F31A F 0.7707(10) 0.6043(11) 0.5156(7) 0.072(5) Uani 0.60 1 d PD A 1 
F32A F 0.7171(7) 0.4943(4) 0.4591(5) 0.085(3) Uani 0.60 1 d PD A 1 
F33A F 0.6949(4) 0.6030(4) 0.3960(3) 0.0688(15) Uani 0.60 1 d PD A 1 
F34A F 0.5974(11) 0.5799(11) 0.4761(10) 0.073(5) Uani 0.60 1 d P A 1 
B3B B 0.6959(16) 0.5516(10) 0.4842(9) 0.039(6) Uani 0.40 1 d PD B 2 
F31B F 0.7762(16) 0.5948(17) 0.5212(11) 0.082(8) Uani 0.40 1 d PD B 2 
F32B F 0.6035(18) 0.5944(15) 0.4702(17) 0.072(7) Uani 0.40 1 d PD B 2 
F33B F 0.7154(9) 0.5203(10) 0.4223(6) 0.088(6) Uani 0.40 1 d PD B 2 
F34B F 0.6726(10) 0.4938(7) 0.5227(9) 0.122(4) Uani 0.40 1 d P B 2 
B4A B 0.7674(9) 0.0604(6) 0.5058(8) 0.0466(18) Uani 0.60 1 d PD C 3 
F41A F 0.7026(5) 0.0004(2) 0.5040(3) 0.0665(16) Uani 0.60 1 d PD C 3 
F42A F 0.8723(7) 0.0377(6) 0.5203(5) 0.117(4) Uani 0.60 1 d PD C 3 
F43A F 0.7531(6) 0.1106(5) 0.4493(4) 0.077(2) Uani 0.60 1 d PD C 3 
F44A F 0.7615(7) 0.1006(5) 0.5693(5) 0.099(3) Uani 0.60 1 d P C 3 
B4B B 0.7815(12) 0.0696(9) 0.5092(12) 0.0466(18) Uani 0.40 1 d PD D 4 
F41B F 0.7840(9) 0.0085(4) 0.4663(6) 0.089(3) Uani 0.40 1 d PD D 4 
F42B F 0.8801(9) 0.1030(10) 0.5132(6) 0.125(5) Uani 0.40 1 d PD D 4 
F43B F 0.7048(9) 0.1207(5) 0.4790(7) 0.078(3) Uani 0.40 1 d PD D 4 
F44B F 0.7915(14) 0.0571(9) 0.5730(7) 0.127(6) Uani 0.40 1 d P D 4 
O1 O 0.8271(3) 0.7274(2) 0.99522(19) 0.0533(9) Uani 1 1 d D . . 
H1A H 0.771(3) 0.709(3) 0.968(3) 0.07(2) Uiso 1 1 d D . . 
H1B H 0.832(4) 0.7754(17) 0.986(3) 0.057(17) Uiso 1 1 d D . . 
O2 O 0.6521(3) 0.65301(19) 0.90041(19) 0.0469(8) Uani 1 1 d D . . 
H2A H 0.647(4) 0.660(2) 0.8548(17) 0.051(15) Uiso 1 1 d D . . 
H2B H 0.663(6) 0.606(2) 0.913(3) 0.10(2) Uiso 1 1 d D . . 
O3 O 0.4062(3) 0.8655(2) 0.52384(17) 0.0547(10) Uani 1 1 d D . . 
H3A H 0.418(5) 0.913(2) 0.537(3) 0.08(2) Uiso 1 1 d D . . 
H3B H 0.375(5) 0.867(3) 0.4783(17) 0.076(19) Uiso 1 1 d D . . 
O4 O 0.2442(3) 0.83445(18) 0.59931(18) 0.0474(8) Uani 1 1 d D . . 
H4A H 0.282(4) 0.836(3) 0.566(2) 0.058(17) Uiso 1 1 d D . . 
H4B H 0.286(4) 0.849(3) 0.6398(16) 0.056(16) Uiso 1 1 d D . . 
O5 O 0.4591(3) 0.2895(2) 0.43079(19) 0.0568(9) Uani 1 1 d D . . 
H5A H 0.430(4) 0.330(2) 0.457(3) 0.085 Uiso 1 1 d D . . 
H5B H 0.524(3) 0.316(3) 0.428(3) 0.085 Uiso 1 1 d D . . 
 
loop_ 
 _atom_site_aniso_label 
 _atom_site_aniso_U_11 
 _atom_site_aniso_U_22 
 _atom_site_aniso_U_33 
 _atom_site_aniso_U_23 
 _atom_site_aniso_U_13 
 _atom_site_aniso_U_12 
Cd1 0.02426(16) 0.02439(12) 0.02544(13) 0.00065(11) 0.00782(12) -0.00158(13) 
C1 0.038(3) 0.0256(19) 0.029(2) 0.0004(16) 0.0043(19) 0.0081(19) 
C2 0.050(3) 0.031(2) 0.031(2) -0.0027(17) -0.006(2) 0.001(2) 
C3 0.041(3) 0.034(2) 0.042(2) 0.0015(18) -0.007(2) -0.007(2) 
C4 0.022(2) 0.0247(19) 0.040(2) 0.0051(16) 0.0005(18) 0.0007(17) 
C5 0.024(3) 0.035(2) 0.055(3) 0.005(2) 0.004(2) -0.0035(19) 
C6 0.035(3) 0.037(2) 0.051(3) 0.0114(19) 0.018(2) 0.003(2) 
C7 0.028(2) 0.0254(18) 0.037(2) 0.0098(16) 0.0130(18) 0.0074(17) 
C8 0.043(3) 0.036(2) 0.035(2) 0.0086(18) 0.023(2) 0.016(2) 
C9 0.042(3) 0.038(2) 0.024(2) 0.0002(16) 0.0092(19) 0.012(2) 
C10 0.034(3) 0.0291(19) 0.028(2) -0.0063(16) 0.0045(19) 0.0011(18) 
C11 0.026(2) 0.0171(16) 0.0292(19) 0.0018(14) 0.0064(17) 0.0056(16) 
C12 0.025(2) 0.0174(17) 0.0314(19) 0.0031(15) 0.0028(17) 0.0038(16) 
C13 0.028(3) 0.045(2) 0.031(2) -0.0010(18) 0.0073(19) 0.004(2) 
C14 0.034(3) 0.049(3) 0.029(2) 0.0087(18) 0.0070(19) 0.010(2) 
C15 0.040(3) 0.037(2) 0.043(2) 0.0113(19) 0.021(2) 0.008(2) 
C16 0.030(3) 0.031(2) 0.034(2) 0.0069(17) 0.0153(19) 0.0087(18) 
C17 0.047(3) 0.0238(19) 0.048(3) 0.0044(18) 0.015(2) 0.0040(19) 
C18 0.046(3) 0.0250(19) 0.047(2) -0.0010(17) 0.011(2) -0.0076(19) 
C19 0.037(3) 0.031(2) 0.032(2) -0.0013(17) 0.015(2) -0.0041(19) 
C20 0.036(3) 0.044(2) 0.034(2) -0.0067(18) 0.007(2) -0.017(2) 
C21 0.029(2) 0.041(2) 0.030(2) 0.0039(17) 0.0004(18) -0.005(2) 
C22 0.032(3) 0.032(2) 0.0275(19) 0.0092(16) 0.0055(18) -0.0028(18) 
C23 0.033(2) 0.0258(18) 0.0219(18) 0.0025(14) 0.0128(17) 0.0004(17) 
C24 0.023(2) 0.0283(19) 0.0303(19) -0.0002(15) 0.0139(17) 0.0000(16) 
C25 0.036(3) 0.029(2) 0.027(2) -0.0022(16) 0.009(2) -0.0066(18) 
C26 0.043(3) 0.035(2) 0.029(2) -0.0045(17) 0.011(2) -0.012(2) 
C27 0.031(3) 0.046(2) 0.038(2) -0.0154(19) 0.020(2) -0.017(2) 
C28 0.019(2) 0.037(2) 0.037(2) -0.0119(18) 0.0094(18) -0.0062(18) 
C29 0.024(3) 0.052(2) 0.039(2) -0.016(2) 0.005(2) 0.001(2) 
C30 0.026(3) 0.039(2) 0.047(3) -0.009(2) 0.000(2) 0.009(2) 
C31 0.025(2) 0.0304(19) 0.033(2) -0.0083(16) 0.0003(18) -0.0023(17) 
C32 0.035(3) 0.032(2) 0.041(2) 0.0044(18) -0.002(2) 0.0031(19) 
C33 0.051(3) 0.027(2) 0.029(2) 0.0067(17) 0.002(2) 0.000(2) 
C34 0.038(3) 0.032(2) 0.027(2) -0.0055(17) 0.008(2) -0.006(2) 
C35 0.024(2) 0.0254(18) 0.0264(19) -0.0089(14) 0.0054(16) -0.0054(17) 
C36 0.022(2) 0.0234(18) 0.0276(19) -0.0063(15) 0.0035(16) -0.0066(16) 
N1 0.0250(19) 0.0236(15) 0.0267(16) -0.0017(12) 0.0049(14) 0.0022(13) 
N2 0.028(2) 0.0227(15) 0.0244(16) -0.0007(12) 0.0026(14) -0.0011(14) 
N3 0.026(2) 0.0322(17) 0.0258(16) -0.0005(13) 0.0083(14) -0.0007(15) 
N4 0.0252(19) 0.0292(16) 0.0240(16) -0.0005(12) 0.0084(14) -0.0028(14) 
N5 0.028(2) 0.0256(16) 0.0249(16) -0.0013(13) 0.0068(14) -0.0054(15) 
N6 0.029(2) 0.0251(16) 0.0256(16) -0.0002(13) 0.0048(15) -0.0049(15) 
Cd2 0.02562(18) 0.02361(12) 0.03611(16) -0.00103(12) 0.00405(13) 0.00373(13) 
C37 0.043(3) 0.033(2) 0.033(2) 0.0040(19) -0.001(2) -0.010(2) 
C38 0.057(4) 0.057(3) 0.035(2) -0.001(2) 0.018(2) -0.012(3) 
C39 0.043(3) 0.056(3) 0.049(3) -0.017(2) 0.025(2) -0.014(2) 
C40 0.029(2) 0.035(2) 0.041(2) -0.0140(18) 0.0103(19) -0.0058(19) 
C41 0.025(3) 0.039(2) 0.061(3) -0.020(2) 0.014(2) -0.002(2) 
C42 0.022(2) 0.032(2) 0.059(3) -0.0096(19) 0.004(2) 0.0019(18) 
C43 0.027(2) 0.0242(18) 0.038(2) -0.0078(16) -0.0035(18) 0.0010(17) 
C44 0.033(3) 0.0220(19) 0.040(2) -0.0007(17) -0.009(2) -0.0023(19) 
C45 0.042(3) 0.039(2) 0.027(2) -0.0005(17) 0.0020(19) 0.001(2) 
C46 0.033(3) 0.033(2) 0.033(2) -0.0047(17) 0.0087(19) 0.0022(19) 
C47 0.022(2) 0.0268(19) 0.031(2) -0.0072(16) 0.0010(17) -0.0002(17) 
C48 0.025(2) 0.0261(18) 0.034(2) -0.0071(15) 0.0043(18) -0.0044(17) 
C49 0.035(3) 0.039(2) 0.031(2) 0.0035(17) 0.0072(19) 0.005(2) 
C50 0.046(3) 0.042(2) 0.031(2) -0.0055(18) 0.006(2) 0.004(2) 
C51 0.036(3) 0.037(2) 0.035(2) -0.0083(17) -0.002(2) 0.0019(19) 
C52 0.028(2) 0.030(2) 0.038(2) 0.0007(17) -0.0014(19) 0.0041(18) 
C53 0.028(3) 0.032(2) 0.047(2) -0.0064(18) 0.006(2) -0.0061(19) 
C54 0.030(3) 0.034(2) 0.054(3) 0.0028(19) 0.012(2) -0.003(2) 
C55 0.027(2) 0.0278(19) 0.042(2) 0.0031(16) 0.0089(19) 0.0070(17) 
C56 0.035(3) 0.039(2) 0.041(2) 0.0038(18) 0.012(2) 0.006(2) 
C57 0.032(3) 0.049(3) 0.033(2) -0.0020(19) 0.008(2) 0.011(2) 
C58 0.036(3) 0.032(2) 0.035(2) -0.0030(17) 0.003(2) 0.008(2) 
C59 0.025(2) 0.0230(18) 0.034(2) 0.0023(15) -0.0003(17) 0.0081(17) 
C60 0.024(2) 0.0247(18) 0.035(2) 0.0001(15) 0.0012(17) 0.0079(17) 
C61 0.037(3) 0.041(2) 0.039(2) 0.0045(19) 0.008(2) 0.005(2) 
C62 0.038(3) 0.043(3) 0.048(3) 0.013(2) 0.007(2) 0.016(2) 
C63 0.051(3) 0.033(2) 0.052(3) 0.014(2) 0.015(2) 0.011(2) 
C64 0.044(3) 0.0265(18) 0.043(2) 0.0036(19) 0.020(2) 0.007(2) 
C65 0.055(4) 0.027(2) 0.063(3) 0.005(2) 0.022(3) 0.001(2) 
C66 0.046(3) 0.035(2) 0.052(3) -0.008(2) 0.017(2) -0.010(2) 
C67 0.034(3) 0.036(2) 0.035(2) -0.0057(18) 0.018(2) -0.003(2) 
C68 0.044(3) 0.045(3) 0.041(2) -0.009(2) 0.010(2) -0.009(2) 
C69 0.042(3) 0.052(3) 0.035(2) -0.005(2) -0.002(2) 0.000(2) 
C70 0.037(3) 0.036(2) 0.042(2) 0.0072(18) 0.005(2) 0.005(2) 
C71 0.028(2) 0.033(2) 0.030(2) 0.0051(17) 0.0130(19) 0.0014(18) 
C72 0.029(2) 0.0310(18) 0.032(2) 0.0002(16) 0.0154(18) 0.0012(19) 
N7 0.027(2) 0.0306(18) 0.0300(17) 0.0004(14) 0.0031(15) -0.0001(15) 
N8 0.028(2) 0.0302(17) 0.0275(17) -0.0034(14) 0.0063(15) -0.0012(15) 
N9 0.028(2) 0.0292(17) 0.0288(17) -0.0001(13) 0.0034(15) 0.0046(15) 
N10 0.028(2) 0.0235(15) 0.0333(18) -0.0013(13) 0.0017(15) 0.0062(15) 
N11 0.027(2) 0.0326(17) 0.0322(17) 0.0021(14) 0.0062(15) 0.0057(15) 
N12 0.027(2) 0.0275(16) 0.0337(18) 0.0019(13) 0.0065(15) 0.0045(15) 
C73 0.038(3) 0.032(2) 0.033(2) -0.0044(17) 0.0164(19) 0.0014(19) 
C74 0.049(3) 0.034(2) 0.035(2) -0.0075(18) 0.013(2) -0.003(2) 
C75 0.049(3) 0.048(3) 0.034(2) -0.0107(19) 0.001(2) -0.011(2) 
C76 0.038(3) 0.043(2) 0.031(2) -0.0025(18) 0.004(2) -0.003(2) 
C77 0.029(3) 0.032(2) 0.030(2) 0.0019(16) 0.0100(19) 0.0005(18) 
C78 0.030(3) 0.032(2) 0.038(2) 0.0008(17) 0.0120(19) -0.0006(18) 
C79 0.043(3) 0.031(2) 0.032(2) -0.0027(16) 0.0043(19) -0.0081(19) 
C80 0.046(3) 0.029(2) 0.045(2) -0.0097(18) 0.019(2) -0.008(2) 
C81 0.035(3) 0.030(2) 0.062(3) 0.002(2) 0.016(2) 0.005(2) 
C82 0.047(3) 0.033(2) 0.036(2) -0.0010(17) 0.005(2) 0.002(2) 
C83 0.120(6) 0.036(3) 0.052(3) 0.001(2) 0.017(4) -0.010(3) 
C84 0.130(7) 0.062(4) 0.051(3) 0.012(3) 0.003(4) -0.049(4) 
C85 0.066(4) 0.076(4) 0.037(3) 0.013(2) 0.006(3) -0.016(3) 
N13 0.031(2) 0.0330(17) 0.0272(16) -0.0036(13) 0.0107(15) -0.0031(15) 
N14 0.041(2) 0.0275(17) 0.045(2) 0.0034(16) 0.0092(19) 0.0040(17) 
N15 0.032(2) 0.0273(16) 0.0315(17) 0.0009(13) 0.0026(15) 0.0008(15) 
N16 0.062(3) 0.056(2) 0.037(2) 0.0094(18) 0.016(2) 0.005(2) 
N17 0.043(2) 0.0351(18) 0.0384(19) -0.0005(15) -0.0004(17) -0.0019(17) 
B1 0.040(4) 0.047(3) 0.031(3) 0.006(2) 0.006(2) 0.009(3) 
F11 0.113(4) 0.0574(19) 0.070(2) -0.0028(15) 0.000(2) -0.009(2) 
F12 0.0414(19) 0.110(3) 0.0453(16) 0.0145(16) 0.0187(14) 0.0226(18) 
F13 0.049(2) 0.0696(19) 0.0562(18) 0.0235(14) 0.0080(15) 0.0237(16) 
F14 0.0530(19) 0.0753(19) 0.0342(14) 0.0085(13) 0.0136(13) 0.0040(15) 
B2 0.039(3) 0.030(2) 0.039(3) 0.007(2) 0.002(2) 0.004(2) 
F21 0.0403(18) 0.0492(15) 0.0687(18) 0.0023(13) -0.0031(14) 0.0087(13) 
F22 0.0594(19) 0.0378(13) 0.0484(15) 0.0171(11) 0.0043(14) -0.0035(13) 
F23 0.059(2) 0.0411(14) 0.0488(15) 0.0032(11) -0.0090(13) -0.0086(13) 
F24 0.086(3) 0.0548(17) 0.0536(18) 0.0010(13) 0.0311(19) -0.0005(16) 
B3A 0.024(6) 0.030(6) 0.044(7) -0.010(6) 0.004(5) -0.003(5) 
F31A 0.046(8) 0.094(8) 0.087(9) -0.051(6) 0.036(7) -0.035(6) 
F32A 0.078(5) 0.057(4) 0.102(7) -0.052(5) -0.015(6) 0.010(4) 
F33A 0.052(4) 0.097(4) 0.060(3) -0.002(3) 0.017(3) -0.023(3) 
F34A 0.028(7) 0.130(12) 0.072(7) -0.045(7) 0.032(5) -0.020(6) 
B3B 0.035(11) 0.035(11) 0.046(11) -0.002(9) 0.008(9) -0.003(8) 
F31B 0.045(11) 0.120(16) 0.063(10) -0.056(9) -0.029(8) 0.004(10) 
F32B 0.057(16) 0.061(6) 0.095(13) -0.023(6) 0.010(10) 0.023(8) 
F33B 0.032(5) 0.176(16) 0.055(6) -0.064(8) 0.008(5) 0.020(7) 
F34B 0.104(10) 0.098(8) 0.189(12) 0.032(8) 0.082(9) 0.014(7) 
B4A 0.050(5) 0.055(4) 0.029(3) -0.004(3) -0.005(3) 0.011(4) 
F41A 0.096(5) 0.038(2) 0.053(3) 0.001(2) -0.011(3) -0.025(3) 
F42A 0.078(6) 0.141(7) 0.148(8) 0.090(7) 0.058(6) 0.057(6) 
F43A 0.061(5) 0.094(5) 0.063(4) 0.042(4) -0.010(3) -0.008(4) 
F44A 0.112(7) 0.098(5) 0.105(6) -0.067(5) 0.059(6) -0.055(5) 
B4B 0.050(5) 0.055(4) 0.029(3) -0.004(3) -0.005(3) 0.011(4) 
F41B 0.093(8) 0.045(4) 0.118(8) -0.039(5) -0.001(7) 0.001(5) 
F42B 0.090(9) 0.224(15) 0.071(7) -0.066(9) 0.037(6) -0.053(11) 
F43B 0.077(9) 0.041(5) 0.096(9) 0.014(5) -0.023(6) 0.005(5) 
F44B 0.151(13) 0.159(13) 0.068(7) 0.024(8) 0.017(7) 0.080(11) 
O1 0.056(3) 0.057(2) 0.049(2) -0.0081(17) 0.0155(19) 0.003(2) 
O2 0.046(2) 0.049(2) 0.046(2) 0.0083(16) 0.0118(17) 0.0059(17) 
O3 0.072(3) 0.061(2) 0.0302(18) 0.0009(16) 0.0100(18) 0.018(2) 
O4 0.042(2) 0.0529(19) 0.0441(19) -0.0088(15) 0.0028(17) -0.0087(16) 
O5 0.053(2) 0.064(2) 0.052(2) -0.0064(17) 0.0081(18) -0.0061(18) 
 
_geom_special_details 
; 
 All esds (except the esd in the dihedral angle between two l.s. planes) 
 are estimated using the full covariance matrix.  The cell esds are taken 
 into account individually in the estimation of esds in distances, angles 
 and torsion angles; correlations between esds in cell parameters are only 
 used when they are defined by crystal symmetry.  An approximate (isotropic) 
 treatment of cell esds is used for estimating esds involving l.s. planes. 
; 
 
loop_ 
 _geom_bond_atom_site_label_1 
 _geom_bond_atom_site_label_2 
 _geom_bond_distance 
 _geom_bond_site_symmetry_2 
 _geom_bond_publ_flag 
Cd1 N1 2.311(3) . ? 
Cd1 N4 2.318(3) . ? 
Cd1 N2 2.321(3) . ? 
Cd1 N3 2.341(3) . ? 
Cd1 N5 2.342(3) . ? 
Cd1 N6 2.356(3) . ? 
C1 N1 1.321(5) . ? 
C1 C2 1.401(6) . ? 
C1 H1 0.9500 . ? 
C2 C3 1.363(7) . ? 
C2 H2 0.9500 . ? 
C3 C4 1.403(6) . ? 
C3 H3 0.9500 . ? 
C4 C12 1.422(6) . ? 
C4 C5 1.425(6) . ? 
C5 C6 1.360(6) . ? 
C5 H5 0.9500 . ? 
C6 C7 1.424(6) . ? 
C6 H6 0.9500 . ? 
C7 C8 1.404(6) . ? 
C7 C11 1.413(5) . ? 
C8 C9 1.371(7) . ? 
C8 H8 0.9500 . ? 
C9 C10 1.394(6) . ? 
C9 H9 0.9500 . ? 
C10 N2 1.324(5) . ? 
C10 H10 0.9500 . ? 
C11 N2 1.355(5) . ? 
C11 C12 1.438(5) . ? 
C12 N1 1.361(5) . ? 
C13 N3 1.328(5) . ? 
C13 C14 1.410(6) . ? 
C13 H13 0.9500 . ? 
C14 C15 1.355(6) . ? 
C14 H14 0.9500 . ? 
C15 C16 1.413(6) . ? 
C15 H15 0.9500 . ? 
C16 C24 1.414(5) . ? 
C16 C17 1.431(6) . ? 
C17 C18 1.330(6) . ? 
C17 H17 0.9500 . ? 
C18 C19 1.431(6) . ? 
C18 H18 0.9500 . ? 
C19 C20 1.394(6) . ? 
C19 C23 1.412(6) . ? 
C20 C21 1.359(6) . ? 
C20 H20 0.9500 . ? 
C21 C22 1.384(6) . ? 
C21 H21 0.9500 . ? 
C22 N4 1.327(5) . ? 
C22 H22 0.9500 . ? 
C23 N4 1.360(5) . ? 
C23 C24 1.445(6) . ? 
C24 N3 1.353(5) . ? 
C25 N5 1.328(5) . ? 
C25 C26 1.390(7) . ? 
C25 H25 0.9500 . ? 
C26 C27 1.370(6) . ? 
C26 H26 0.9500 . ? 
C27 C28 1.400(6) . ? 
C27 H27 0.9500 . ? 
C28 C36 1.412(5) . ? 
C28 C29 1.422(6) . ? 
C29 C30 1.341(6) . ? 
C29 H29 0.9500 . ? 
C30 C31 1.447(6) . ? 
C30 H30 0.9500 . ? 
C31 C32 1.392(6) . ? 
C31 C35 1.408(6) . ? 
C32 C33 1.363(6) . ? 
C32 H32 0.9500 . ? 
C33 C34 1.395(6) . ? 
C33 H33 0.9500 . ? 
C34 N6 1.326(5) . ? 
C34 H34 0.9500 . ? 
C35 N6 1.360(5) . ? 
C35 C36 1.444(5) . ? 
C36 N5 1.349(5) . ? 
Cd2 N11 2.313(3) . ? 
Cd2 N7 2.331(3) . ? 
Cd2 N12 2.342(3) . ? 
Cd2 N9 2.354(3) . ? 
Cd2 N10 2.354(4) . ? 
Cd2 N8 2.365(3) . ? 
C37 N7 1.331(6) . ? 
C37 C38 1.382(7) . ? 
C37 H37 0.9500 . ? 
C38 C39 1.344(7) . ? 
C38 H38 0.9500 . ? 
C39 C40 1.405(6) . ? 
C39 H39 0.9500 . ? 
C40 C48 1.412(6) . ? 
C40 C41 1.436(7) . ? 
C41 C42 1.333(6) . ? 
C41 H41 0.9500 . ? 
C42 C43 1.427(6) . ? 
C42 H42 0.9500 . ? 
C43 C44 1.387(6) . ? 
C43 C47 1.417(6) . ? 
C44 C45 1.378(6) . ? 
C44 H44 0.9500 . ? 
C45 C46 1.386(6) . ? 
C45 H45 0.9500 . ? 
C46 N8 1.330(5) . ? 
C46 H46 0.9500 . ? 
C47 N8 1.356(5) . ? 
C47 C48 1.446(5) . ? 
C48 N7 1.354(5) . ? 
C49 N9 1.323(5) . ? 
C49 C50 1.384(6) . ? 
C49 H49 0.9500 . ? 
C50 C51 1.368(7) . ? 
C50 H50 0.9500 . ? 
C51 C52 1.402(6) . ? 
C51 H51 0.9500 . ? 
C52 C60 1.409(6) . ? 
C52 C53 1.419(6) . ? 
C53 C54 1.354(6) . ? 
C53 H53 0.9500 . ? 
C54 C55 1.419(6) . ? 
C54 H54 0.9500 . ? 
C55 C56 1.404(6) . ? 
C55 C59 1.411(6) . ? 
C56 C57 1.374(7) . ? 
C56 H56 0.9500 . ? 
C57 C58 1.409(7) . ? 
C57 H57 0.9500 . ? 
C58 N10 1.325(5) . ? 
C58 H58 0.9500 . ? 
C59 N10 1.359(5) . ? 
C59 C60 1.451(5) . ? 
C60 N9 1.362(5) . ? 
C61 N11 1.328(6) . ? 
C61 C62 1.394(6) . ? 
C61 H61 0.9500 . ? 
C62 C63 1.359(7) . ? 
C62 H62 0.9500 . ? 
C63 C64 1.406(7) . ? 
C63 H63 0.9500 . ? 
C64 C65 1.422(7) . ? 
C64 C72 1.425(5) . ? 
C65 C66 1.333(7) . ? 
C65 H65 0.9500 . ? 
C66 C67 1.436(6) . ? 
C66 H66 0.9500 . ? 
C67 C68 1.394(7) . ? 
C67 C71 1.404(6) . ? 
C68 C69 1.361(6) . ? 
C68 H68 0.9500 . ? 
C69 C70 1.389(6) . ? 
C69 H69 0.9500 . ? 
C70 N12 1.321(5) . ? 
C70 H70 0.9500 . ? 
C71 N12 1.369(5) . ? 
C71 C72 1.442(6) . ? 
C72 N11 1.342(5) . ? 
C73 N13 1.344(5) . ? 
C73 C74 1.383(6) . ? 
C73 C82 1.501(6) . ? 
C74 C75 1.371(7) . ? 
C74 H74 0.9500 . ? 
C75 C76 1.383(6) . ? 
C75 H75 0.9500 . ? 
C76 C77 1.381(6) . ? 
C76 H76 0.9500 . ? 
C77 N13 1.336(5) . ? 
C77 C78 1.517(5) . ? 
C78 N15 1.456(5) . ? 
C78 H78A 0.9900 . ? 
C78 H78B 0.9900 . ? 
C79 N15 1.348(5) . ? 
C79 C80 1.369(6) . ? 
C79 H79 0.9500 . ? 
C80 C81 1.389(7) . ? 
C80 H80 0.9500 . ? 
C81 N14 1.324(6) . ? 
C81 H81 0.9500 . ? 
C82 N17 1.459(6) . ? 
C82 H82A 0.9900 . ? 
C82 H82B 0.9900 . ? 
C83 N17 1.347(6) . ? 
C83 C84 1.363(9) . ? 
C83 H83 0.9500 . ? 
C84 C85 1.349(8) . ? 
C84 H84 0.9500 . ? 
C85 N16 1.332(6) . ? 
C85 H85 0.9500 . ? 
N14 N15 1.349(5) . ? 
N16 N17 1.336(5) . ? 
B1 F11 1.354(6) . ? 
B1 F13 1.368(6) . ? 
B1 F14 1.384(6) . ? 
B1 F12 1.400(6) . ? 
B2 F24 1.368(6) . ? 
B2 F22 1.379(5) . ? 
B2 F21 1.381(6) . ? 
B2 F23 1.397(6) . ? 
B3A F34A 1.344(16) . ? 
B3A F31A 1.353(11) . ? 
B3A F33A 1.380(11) . ? 
B3A F32A 1.386(12) . ? 
B3B F34B 1.31(2) . ? 
B3B F31B 1.347(14) . ? 
B3B F33B 1.362(14) . ? 
B3B F32B 1.388(16) . ? 
B4A F41A 1.335(11) . ? 
B4A F43A 1.356(12) . ? 
B4A F42A 1.389(11) . ? 
B4A F44A 1.400(17) . ? 
B4B F44B 1.20(3) . ? 
B4B F41B 1.337(16) . ? 
B4B F43B 1.361(13) . ? 
B4B F42B 1.394(15) . ? 
O1 H1A 0.86(3) . ? 
O1 H1B 0.86(3) . ? 
O2 H2A 0.86(3) . ? 
O2 H2B 0.86(3) . ? 
O3 H3A 0.87(3) . ? 
O3 H3B 0.87(3) . ? 
O4 H4A 0.88(3) . ? 
O4 H4B 0.87(3) . ? 
O5 H5A 0.983(19) . ? 
O5 H5B 0.97(2) . ? 
 
loop_ 
 _geom_angle_atom_site_label_1 
 _geom_angle_atom_site_label_2 
 _geom_angle_atom_site_label_3 
 _geom_angle 
 _geom_angle_site_symmetry_1 
 _geom_angle_site_symmetry_3 
 _geom_angle_publ_flag 
N1 Cd1 N4 166.07(10) . . ? 
N1 Cd1 N2 72.78(11) . . ? 
N4 Cd1 N2 99.48(11) . . ? 
N1 Cd1 N3 98.86(11) . . ? 
N4 Cd1 N3 72.18(11) . . ? 
N2 Cd1 N3 108.40(11) . . ? 
N1 Cd1 N5 99.41(11) . . ? 
N4 Cd1 N5 91.62(11) . . ? 
N2 Cd1 N5 159.31(10) . . ? 
N3 Cd1 N5 91.56(11) . . ? 
N1 Cd1 N6 97.27(11) . . ? 
N4 Cd1 N6 94.33(11) . . ? 
N2 Cd1 N6 90.56(11) . . ? 
N3 Cd1 N6 158.04(11) . . ? 
N5 Cd1 N6 71.11(11) . . ? 
N1 C1 C2 122.7(4) . . ? 
N1 C1 H1 118.6 . . ? 
C2 C1 H1 118.6 . . ? 
C3 C2 C1 119.1(4) . . ? 
C3 C2 H2 120.5 . . ? 
C1 C2 H2 120.5 . . ? 
C2 C3 C4 120.3(4) . . ? 
C2 C3 H3 119.9 . . ? 
C4 C3 H3 119.9 . . ? 
C3 C4 C12 117.1(4) . . ? 
C3 C4 C5 123.2(4) . . ? 
C12 C4 C5 119.7(4) . . ? 
C6 C5 C4 121.0(4) . . ? 
C6 C5 H5 119.5 . . ? 
C4 C5 H5 119.5 . . ? 
C5 C6 C7 120.8(4) . . ? 
C5 C6 H6 119.6 . . ? 
C7 C6 H6 119.6 . . ? 
C8 C7 C11 117.7(4) . . ? 
C8 C7 C6 122.4(4) . . ? 
C11 C7 C6 119.9(4) . . ? 
C9 C8 C7 119.8(4) . . ? 
C9 C8 H8 120.1 . . ? 
C7 C8 H8 120.1 . . ? 
C8 C9 C10 118.5(4) . . ? 
C8 C9 H9 120.8 . . ? 
C10 C9 H9 120.8 . . ? 
N2 C10 C9 123.7(4) . . ? 
N2 C10 H10 118.2 . . ? 
C9 C10 H10 118.2 . . ? 
N2 C11 C7 121.9(3) . . ? 
N2 C11 C12 118.5(3) . . ? 
C7 C11 C12 119.6(4) . . ? 
N1 C12 C4 121.8(3) . . ? 
N1 C12 C11 119.2(3) . . ? 
C4 C12 C11 119.0(3) . . ? 
N3 C13 C14 122.9(4) . . ? 
N3 C13 H13 118.5 . . ? 
C14 C13 H13 118.5 . . ? 
C15 C14 C13 119.1(4) . . ? 
C15 C14 H14 120.4 . . ? 
C13 C14 H14 120.4 . . ? 
C14 C15 C16 119.9(4) . . ? 
C14 C15 H15 120.1 . . ? 
C16 C15 H15 120.1 . . ? 
C15 C16 C24 117.2(4) . . ? 
C15 C16 C17 123.2(4) . . ? 
C24 C16 C17 119.6(4) . . ? 
C18 C17 C16 121.2(4) . . ? 
C18 C17 H17 119.4 . . ? 
C16 C17 H17 119.4 . . ? 
C17 C18 C19 121.7(4) . . ? 
C17 C18 H18 119.1 . . ? 
C19 C18 H18 119.1 . . ? 
C20 C19 C23 117.8(4) . . ? 
C20 C19 C18 123.3(4) . . ? 
C23 C19 C18 118.9(4) . . ? 
C21 C20 C19 119.6(4) . . ? 
C21 C20 H20 120.2 . . ? 
C19 C20 H20 120.2 . . ? 
C20 C21 C22 119.7(4) . . ? 
C20 C21 H21 120.1 . . ? 
C22 C21 H21 120.1 . . ? 
N4 C22 C21 122.7(4) . . ? 
N4 C22 H22 118.6 . . ? 
C21 C22 H22 118.6 . . ? 
N4 C23 C19 121.6(4) . . ? 
N4 C23 C24 118.6(3) . . ? 
C19 C23 C24 119.8(3) . . ? 
N3 C24 C16 122.7(4) . . ? 
N3 C24 C23 118.6(3) . . ? 
C16 C24 C23 118.7(3) . . ? 
N5 C25 C26 123.2(4) . . ? 
N5 C25 H25 118.4 . . ? 
C26 C25 H25 118.4 . . ? 
C27 C26 C25 118.1(4) . . ? 
C27 C26 H26 121.0 . . ? 
C25 C26 H26 121.0 . . ? 
C26 C27 C28 120.9(4) . . ? 
C26 C27 H27 119.6 . . ? 
C28 C27 H27 119.6 . . ? 
C27 C28 C36 116.7(4) . . ? 
C27 C28 C29 123.9(4) . . ? 
C36 C28 C29 119.3(4) . . ? 
C30 C29 C28 122.1(4) . . ? 
C30 C29 H29 118.9 . . ? 
C28 C29 H29 118.9 . . ? 
C29 C30 C31 120.6(4) . . ? 
C29 C30 H30 119.7 . . ? 
C31 C30 H30 119.7 . . ? 
C32 C31 C35 117.8(4) . . ? 
C32 C31 C30 123.3(4) . . ? 
C35 C31 C30 118.8(4) . . ? 
C33 C32 C31 120.3(4) . . ? 
C33 C32 H32 119.8 . . ? 
C31 C32 H32 119.8 . . ? 
C32 C33 C34 118.2(4) . . ? 
C32 C33 H33 120.9 . . ? 
C34 C33 H33 120.9 . . ? 
N6 C34 C33 123.8(4) . . ? 
N6 C34 H34 118.1 . . ? 
C33 C34 H34 118.1 . . ? 
N6 C35 C31 121.9(3) . . ? 
N6 C35 C36 118.1(4) . . ? 
C31 C35 C36 120.0(3) . . ? 
N5 C36 C28 122.3(3) . . ? 
N5 C36 C35 118.7(3) . . ? 
C28 C36 C35 119.1(4) . . ? 
C1 N1 C12 119.0(4) . . ? 
C1 N1 Cd1 126.4(3) . . ? 
C12 N1 Cd1 114.5(2) . . ? 
C10 N2 C11 118.5(4) . . ? 
C10 N2 Cd1 126.8(3) . . ? 
C11 N2 Cd1 114.7(2) . . ? 
C13 N3 C24 118.2(3) . . ? 
C13 N3 Cd1 127.0(3) . . ? 
C24 N3 Cd1 114.8(3) . . ? 
C22 N4 C23 118.5(3) . . ? 
C22 N4 Cd1 126.2(3) . . ? 
C23 N4 Cd1 115.3(3) . . ? 
C25 N5 C36 118.8(4) . . ? 
C25 N5 Cd1 124.7(3) . . ? 
C36 N5 Cd1 116.0(2) . . ? 
C34 N6 C35 117.9(4) . . ? 
C34 N6 Cd1 126.6(3) . . ? 
C35 N6 Cd1 115.5(2) . . ? 
N11 Cd2 N7 109.84(11) . . ? 
N11 Cd2 N12 72.05(11) . . ? 
N7 Cd2 N12 100.84(12) . . ? 
N11 Cd2 N9 99.32(11) . . ? 
N7 Cd2 N9 90.59(11) . . ? 
N12 Cd2 N9 167.45(11) . . ? 
N11 Cd2 N10 90.67(11) . . ? 
N7 Cd2 N10 155.03(11) . . ? 
N12 Cd2 N10 98.94(12) . . ? 
N9 Cd2 N10 71.57(11) . . ? 
N11 Cd2 N8 165.05(12) . . ? 
N7 Cd2 N8 71.33(11) . . ? 
N12 Cd2 N8 93.03(11) . . ? 
N9 Cd2 N8 95.55(11) . . ? 
N10 Cd2 N8 92.61(11) . . ? 
N7 C37 C38 123.2(5) . . ? 
N7 C37 H37 118.4 . . ? 
C38 C37 H37 118.4 . . ? 
C39 C38 C37 120.1(4) . . ? 
C39 C38 H38 120.0 . . ? 
C37 C38 H38 120.0 . . ? 
C38 C39 C40 119.4(4) . . ? 
C38 C39 H39 120.3 . . ? 
C40 C39 H39 120.3 . . ? 
C39 C40 C48 117.3(4) . . ? 
C39 C40 C41 123.5(4) . . ? 
C48 C40 C41 119.2(4) . . ? 
C42 C41 C40 121.4(4) . . ? 
C42 C41 H41 119.3 . . ? 
C40 C41 H41 119.3 . . ? 
C41 C42 C43 122.0(4) . . ? 
C41 C42 H42 119.0 . . ? 
C43 C42 H42 119.0 . . ? 
C44 C43 C47 118.1(4) . . ? 
C44 C43 C42 123.4(4) . . ? 
C47 C43 C42 118.5(4) . . ? 
C45 C44 C43 119.7(4) . . ? 
C45 C44 H44 120.1 . . ? 
C43 C44 H44 120.1 . . ? 
C44 C45 C46 118.8(4) . . ? 
C44 C45 H45 120.6 . . ? 
C46 C45 H45 120.6 . . ? 
N8 C46 C45 123.2(4) . . ? 
N8 C46 H46 118.4 . . ? 
C45 C46 H46 118.4 . . ? 
N8 C47 C43 121.6(4) . . ? 
N8 C47 C48 118.4(3) . . ? 
C43 C47 C48 119.9(4) . . ? 
N7 C48 C40 122.5(4) . . ? 
N7 C48 C47 118.5(3) . . ? 
C40 C48 C47 119.0(4) . . ? 
N9 C49 C50 123.5(4) . . ? 
N9 C49 H49 118.2 . . ? 
C50 C49 H49 118.2 . . ? 
C51 C50 C49 119.0(4) . . ? 
C51 C50 H50 120.5 . . ? 
C49 C50 H50 120.5 . . ? 
C50 C51 C52 119.8(4) . . ? 
C50 C51 H51 120.1 . . ? 
C52 C51 H51 120.1 . . ? 
C51 C52 C60 117.2(4) . . ? 
C51 C52 C53 123.1(4) . . ? 
C60 C52 C53 119.7(4) . . ? 
C54 C53 C52 121.0(4) . . ? 
C54 C53 H53 119.5 . . ? 
C52 C53 H53 119.5 . . ? 
C53 C54 C55 121.4(4) . . ? 
C53 C54 H54 119.3 . . ? 
C55 C54 H54 119.3 . . ? 
C56 C55 C59 117.1(4) . . ? 
C56 C55 C54 123.2(4) . . ? 
C59 C55 C54 119.7(4) . . ? 
C57 C56 C55 120.5(4) . . ? 
C57 C56 H56 119.8 . . ? 
C55 C56 H56 119.8 . . ? 
C56 C57 C58 118.4(4) . . ? 
C56 C57 H57 120.8 . . ? 
C58 C57 H57 120.8 . . ? 
N10 C58 C57 122.6(4) . . ? 
N10 C58 H58 118.7 . . ? 
C57 C58 H58 118.7 . . ? 
N10 C59 C55 122.3(4) . . ? 
N10 C59 C60 118.8(4) . . ? 
C55 C59 C60 118.9(4) . . ? 
N9 C60 C52 122.3(4) . . ? 
N9 C60 C59 118.4(4) . . ? 
C52 C60 C59 119.3(4) . . ? 
N11 C61 C62 123.2(4) . . ? 
N11 C61 H61 118.4 . . ? 
C62 C61 H61 118.4 . . ? 
C63 C62 C61 119.0(4) . . ? 
C63 C62 H62 120.5 . . ? 
C61 C62 H62 120.5 . . ? 
C62 C63 C64 120.1(4) . . ? 
C62 C63 H63 120.0 . . ? 
C64 C63 H63 120.0 . . ? 
C63 C64 C65 124.1(4) . . ? 
C63 C64 C72 116.9(4) . . ? 
C65 C64 C72 119.1(4) . . ? 
C66 C65 C64 122.1(4) . . ? 
C66 C65 H65 118.9 . . ? 
C64 C65 H65 118.9 . . ? 
C65 C66 C67 121.3(4) . . ? 
C65 C66 H66 119.3 . . ? 
C67 C66 H66 119.3 . . ? 
C68 C67 C71 117.9(4) . . ? 
C68 C67 C66 123.6(4) . . ? 
C71 C67 C66 118.4(4) . . ? 
C69 C68 C67 120.1(4) . . ? 
C69 C68 H68 119.9 . . ? 
C67 C68 H68 119.9 . . ? 
C68 C69 C70 118.4(4) . . ? 
C68 C69 H69 120.8 . . ? 
C70 C69 H69 120.8 . . ? 
N12 C70 C69 124.0(4) . . ? 
N12 C70 H70 118.0 . . ? 
C69 C70 H70 118.0 . . ? 
N12 C71 C67 121.7(4) . . ? 
N12 C71 C72 117.5(4) . . ? 
C67 C71 C72 120.8(4) . . ? 
N11 C72 C64 122.3(4) . . ? 
N11 C72 C71 119.5(3) . . ? 
C64 C72 C71 118.2(4) . . ? 
C37 N7 C48 117.4(4) . . ? 
C37 N7 Cd2 126.2(3) . . ? 
C48 N7 Cd2 116.4(2) . . ? 
C46 N8 C47 118.5(4) . . ? 
C46 N8 Cd2 126.3(3) . . ? 
C47 N8 Cd2 115.1(2) . . ? 
C49 N9 C60 118.1(4) . . ? 
C49 N9 Cd2 126.3(3) . . ? 
C60 N9 Cd2 115.1(2) . . ? 
C58 N10 C59 119.1(4) . . ? 
C58 N10 Cd2 125.8(3) . . ? 
C59 N10 Cd2 115.0(2) . . ? 
C61 N11 C72 118.6(4) . . ? 
C61 N11 Cd2 125.6(3) . . ? 
C72 N11 Cd2 115.8(3) . . ? 
C70 N12 C71 117.8(4) . . ? 
C70 N12 Cd2 127.2(3) . . ? 
C71 N12 Cd2 114.8(3) . . ? 
N13 C73 C74 122.0(4) . . ? 
N13 C73 C82 116.5(4) . . ? 
C74 C73 C82 121.5(4) . . ? 
C75 C74 C73 118.9(4) . . ? 
C75 C74 H74 120.6 . . ? 
C73 C74 H74 120.6 . . ? 
C74 C75 C76 119.9(4) . . ? 
C74 C75 H75 120.0 . . ? 
C76 C75 H75 120.0 . . ? 
C77 C76 C75 117.7(4) . . ? 
C77 C76 H76 121.2 . . ? 
C75 C76 H76 121.2 . . ? 
N13 C77 C76 123.3(4) . . ? 
N13 C77 C78 115.1(4) . . ? 
C76 C77 C78 121.6(4) . . ? 
N15 C78 C77 113.3(3) . . ? 
N15 C78 H78A 108.9 . . ? 
C77 C78 H78A 108.9 . . ? 
N15 C78 H78B 108.9 . . ? 
C77 C78 H78B 108.9 . . ? 
H78A C78 H78B 107.7 . . ? 
N15 C79 C80 107.0(4) . . ? 
N15 C79 H79 126.5 . . ? 
C80 C79 H79 126.5 . . ? 
C79 C80 C81 104.2(4) . . ? 
C79 C80 H80 127.9 . . ? 
C81 C80 H80 127.9 . . ? 
N14 C81 C80 112.7(5) . . ? 
N14 C81 H81 123.6 . . ? 
C80 C81 H81 123.6 . . ? 
N17 C82 C73 112.0(4) . . ? 
N17 C82 H82A 109.2 . . ? 
C73 C82 H82A 109.2 . . ? 
N17 C82 H82B 109.2 . . ? 
C73 C82 H82B 109.2 . . ? 
H82A C82 H82B 107.9 . . ? 
N17 C83 C84 105.5(5) . . ? 
N17 C83 H83 127.2 . . ? 
C84 C83 H83 127.2 . . ? 
C85 C84 C83 106.5(5) . . ? 
C85 C84 H84 126.7 . . ? 
C83 C84 H84 126.7 . . ? 
N16 C85 C84 111.5(5) . . ? 
N16 C85 H85 124.2 . . ? 
C84 C85 H85 124.2 . . ? 
C77 N13 C73 118.2(4) . . ? 
C81 N14 N15 103.9(4) . . ? 
C79 N15 N14 112.2(3) . . ? 
C79 N15 C78 127.2(4) . . ? 
N14 N15 C78 120.6(3) . . ? 
C85 N16 N17 104.3(4) . . ? 
N16 N17 C83 112.1(4) . . ? 
N16 N17 C82 120.2(3) . . ? 
C83 N17 C82 127.7(4) . . ? 
F11 B1 F13 109.7(5) . . ? 
F11 B1 F14 110.0(4) . . ? 
F13 B1 F14 110.8(4) . . ? 
F11 B1 F12 110.8(4) . . ? 
F13 B1 F12 107.8(4) . . ? 
F14 B1 F12 107.7(4) . . ? 
F24 B2 F22 110.6(4) . . ? 
F24 B2 F21 109.5(4) . . ? 
F22 B2 F21 109.9(4) . . ? 
F24 B2 F23 108.8(4) . . ? 
F22 B2 F23 109.2(4) . . ? 
F21 B2 F23 108.8(4) . . ? 
F34A B3A F31A 113.3(12) . . ? 
F34A B3A F33A 108.7(12) . . ? 
F31A B3A F33A 111.0(11) . . ? 
F34A B3A F32A 109.2(13) . . ? 
F31A B3A F32A 108.2(13) . . ? 
F33A B3A F32A 106.2(8) . . ? 
F34B B3B F31B 113(2) . . ? 
F34B B3B F33B 106.4(15) . . ? 
F31B B3B F33B 113.2(17) . . ? 
F34B B3B F32B 102.5(19) . . ? 
F31B B3B F32B 109.9(19) . . ? 
F33B B3B F32B 111.6(17) . . ? 
F41A B4A F43A 120.2(10) . . ? 
F41A B4A F42A 111.8(9) . . ? 
F43A B4A F42A 107.1(10) . . ? 
F41A B4A F44A 104.8(10) . . ? 
F43A B4A F44A 109.2(9) . . ? 
F42A B4A F44A 102.2(10) . . ? 
F44B B4B F41B 116.9(16) . . ? 
F44B B4B F43B 116.3(17) . . ? 
F41B B4B F43B 112.1(14) . . ? 
F44B B4B F42B 97.2(16) . . ? 
F41B B4B F42B 102.5(14) . . ? 
F43B B4B F42B 109.4(14) . . ? 
H1A O1 H1B 109(5) . . ? 
H2A O2 H2B 113(5) . . ? 
H3A O3 H3B 106(5) . . ? 
H4A O4 H4B 106(5) . . ? 
H5A O5 H5B 97(3) . . ? 
 
loop_ 
 _geom_torsion_atom_site_label_1 
 _geom_torsion_atom_site_label_2 
 _geom_torsion_atom_site_label_3 
 _geom_torsion_atom_site_label_4 
 _geom_torsion 
 _geom_torsion_site_symmetry_1 
 _geom_torsion_site_symmetry_2 
 _geom_torsion_site_symmetry_3 
 _geom_torsion_site_symmetry_4 
 _geom_torsion_publ_flag 
N1 C1 C2 C3 -0.1(6) . . . . ? 
C1 C2 C3 C4 -1.0(6) . . . . ? 
C2 C3 C4 C12 1.7(6) . . . . ? 
C2 C3 C4 C5 -178.3(4) . . . . ? 
C3 C4 C5 C6 179.0(4) . . . . ? 
C12 C4 C5 C6 -1.0(6) . . . . ? 
C4 C5 C6 C7 0.4(6) . . . . ? 
C5 C6 C7 C8 -177.6(4) . . . . ? 
C5 C6 C7 C11 0.7(6) . . . . ? 
C11 C7 C8 C9 0.4(5) . . . . ? 
C6 C7 C8 C9 178.8(4) . . . . ? 
C7 C8 C9 C10 0.6(6) . . . . ? 
C8 C9 C10 N2 -1.0(6) . . . . ? 
C8 C7 C11 N2 -1.2(5) . . . . ? 
C6 C7 C11 N2 -179.6(4) . . . . ? 
C8 C7 C11 C12 177.2(3) . . . . ? 
C6 C7 C11 C12 -1.2(5) . . . . ? 
C3 C4 C12 N1 -1.4(5) . . . . ? 
C5 C4 C12 N1 178.6(3) . . . . ? 
C3 C4 C12 C11 -179.5(3) . . . . ? 
C5 C4 C12 C11 0.5(5) . . . . ? 
N2 C11 C12 N1 0.9(5) . . . . ? 
C7 C11 C12 N1 -177.5(3) . . . . ? 
N2 C11 C12 C4 179.0(3) . . . . ? 
C7 C11 C12 C4 0.6(5) . . . . ? 
N3 C13 C14 C15 -0.6(6) . . . . ? 
C13 C14 C15 C16 0.0(6) . . . . ? 
C14 C15 C16 C24 -0.8(6) . . . . ? 
C14 C15 C16 C17 -178.2(4) . . . . ? 
C15 C16 C17 C18 175.6(4) . . . . ? 
C24 C16 C17 C18 -1.7(6) . . . . ? 
C16 C17 C18 C19 -1.1(7) . . . . ? 
C17 C18 C19 C20 -175.2(4) . . . . ? 
C17 C18 C19 C23 3.4(6) . . . . ? 
C23 C19 C20 C21 -0.9(6) . . . . ? 
C18 C19 C20 C21 177.7(4) . . . . ? 
C19 C20 C21 C22 2.4(6) . . . . ? 
C20 C21 C22 N4 -1.3(6) . . . . ? 
C20 C19 C23 N4 -1.6(6) . . . . ? 
C18 C19 C23 N4 179.6(4) . . . . ? 
C20 C19 C23 C24 175.9(4) . . . . ? 
C18 C19 C23 C24 -2.9(6) . . . . ? 
C15 C16 C24 N3 2.2(6) . . . . ? 
C17 C16 C24 N3 179.8(4) . . . . ? 
C15 C16 C24 C23 -175.3(3) . . . . ? 
C17 C16 C24 C23 2.2(5) . . . . ? 
N4 C23 C24 N3 0.0(5) . . . . ? 
C19 C23 C24 N3 -177.6(3) . . . . ? 
N4 C23 C24 C16 177.7(3) . . . . ? 
C19 C23 C24 C16 0.1(5) . . . . ? 
N5 C25 C26 C27 -2.1(7) . . . . ? 
C25 C26 C27 C28 1.9(6) . . . . ? 
C26 C27 C28 C36 -0.2(6) . . . . ? 
C26 C27 C28 C29 -179.7(4) . . . . ? 
C27 C28 C29 C30 179.6(4) . . . . ? 
C36 C28 C29 C30 0.1(6) . . . . ? 
C28 C29 C30 C31 -0.5(7) . . . . ? 
C29 C30 C31 C32 -178.1(4) . . . . ? 
C29 C30 C31 C35 2.0(6) . . . . ? 
C35 C31 C32 C33 -0.7(6) . . . . ? 
C30 C31 C32 C33 179.3(4) . . . . ? 
C31 C32 C33 C34 1.3(7) . . . . ? 
C32 C33 C34 N6 -0.4(7) . . . . ? 
C32 C31 C35 N6 -0.8(6) . . . . ? 
C30 C31 C35 N6 179.2(4) . . . . ? 
C32 C31 C35 C36 177.1(4) . . . . ? 
C30 C31 C35 C36 -2.9(5) . . . . ? 
C27 C28 C36 N5 -1.6(5) . . . . ? 
C29 C28 C36 N5 178.0(4) . . . . ? 
C27 C28 C36 C35 179.4(3) . . . . ? 
C29 C28 C36 C35 -1.1(5) . . . . ? 
N6 C35 C36 N5 1.4(5) . . . . ? 
C31 C35 C36 N5 -176.5(3) . . . . ? 
N6 C35 C36 C28 -179.5(3) . . . . ? 
C31 C35 C36 C28 2.5(5) . . . . ? 
C2 C1 N1 C12 0.4(5) . . . . ? 
C2 C1 N1 Cd1 -175.8(3) . . . . ? 
C4 C12 N1 C1 0.4(5) . . . . ? 
C11 C12 N1 C1 178.5(3) . . . . ? 
C4 C12 N1 Cd1 177.0(3) . . . . ? 
C11 C12 N1 Cd1 -4.9(4) . . . . ? 
N4 Cd1 N1 C1 -121.1(4) . . . . ? 
N2 Cd1 N1 C1 -178.8(3) . . . . ? 
N3 Cd1 N1 C1 -72.2(3) . . . . ? 
N5 Cd1 N1 C1 20.9(3) . . . . ? 
N6 Cd1 N1 C1 92.8(3) . . . . ? 
N4 Cd1 N1 C12 62.6(5) . . . . ? 
N2 Cd1 N1 C12 4.8(2) . . . . ? 
N3 Cd1 N1 C12 111.5(2) . . . . ? 
N5 Cd1 N1 C12 -155.5(2) . . . . ? 
N6 Cd1 N1 C12 -83.5(2) . . . . ? 
C9 C10 N2 C11 0.2(6) . . . . ? 
C9 C10 N2 Cd1 179.0(3) . . . . ? 
C7 C11 N2 C10 0.8(5) . . . . ? 
C12 C11 N2 C10 -177.5(3) . . . . ? 
C7 C11 N2 Cd1 -178.0(3) . . . . ? 
C12 C11 N2 Cd1 3.6(4) . . . . ? 
N1 Cd1 N2 C10 176.8(3) . . . . ? 
N4 Cd1 N2 C10 8.8(3) . . . . ? 
N3 Cd1 N2 C10 83.0(3) . . . . ? 
N5 Cd1 N2 C10 -112.8(4) . . . . ? 
N6 Cd1 N2 C10 -85.7(3) . . . . ? 
N1 Cd1 N2 C11 -4.4(2) . . . . ? 
N4 Cd1 N2 C11 -172.5(3) . . . . ? 
N3 Cd1 N2 C11 -98.2(3) . . . . ? 
N5 Cd1 N2 C11 66.0(5) . . . . ? 
N6 Cd1 N2 C11 93.0(3) . . . . ? 
C14 C13 N3 C24 2.0(6) . . . . ? 
C14 C13 N3 Cd1 -177.6(3) . . . . ? 
C16 C24 N3 C13 -2.8(5) . . . . ? 
C23 C24 N3 C13 174.8(3) . . . . ? 
C16 C24 N3 Cd1 176.8(3) . . . . ? 
C23 C24 N3 Cd1 -5.6(4) . . . . ? 
N1 Cd1 N3 C13 16.7(3) . . . . ? 
N4 Cd1 N3 C13 -174.3(3) . . . . ? 
N2 Cd1 N3 C13 91.4(3) . . . . ? 
N5 Cd1 N3 C13 -83.1(3) . . . . ? 
N6 Cd1 N3 C13 -120.1(4) . . . . ? 
N1 Cd1 N3 C24 -162.9(3) . . . . ? 
N4 Cd1 N3 C24 6.1(2) . . . . ? 
N2 Cd1 N3 C24 -88.2(3) . . . . ? 
N5 Cd1 N3 C24 97.3(3) . . . . ? 
N6 Cd1 N3 C24 60.3(4) . . . . ? 
C21 C22 N4 C23 -1.2(6) . . . . ? 
C21 C22 N4 Cd1 178.2(3) . . . . ? 
C19 C23 N4 C22 2.7(5) . . . . ? 
C24 C23 N4 C22 -174.9(3) . . . . ? 
C19 C23 N4 Cd1 -176.8(3) . . . . ? 
C24 C23 N4 Cd1 5.7(4) . . . . ? 
N1 Cd1 N4 C22 -134.2(4) . . . . ? 
N2 Cd1 N4 C22 -79.2(3) . . . . ? 
N3 Cd1 N4 C22 174.4(3) . . . . ? 
N5 Cd1 N4 C22 83.3(3) . . . . ? 
N6 Cd1 N4 C22 12.1(3) . . . . ? 
N1 Cd1 N4 C23 45.3(5) . . . . ? 
N2 Cd1 N4 C23 100.3(3) . . . . ? 
N3 Cd1 N4 C23 -6.1(2) . . . . ? 
N5 Cd1 N4 C23 -97.3(3) . . . . ? 
N6 Cd1 N4 C23 -168.4(2) . . . . ? 
C26 C25 N5 C36 0.4(6) . . . . ? 
C26 C25 N5 Cd1 -171.1(3) . . . . ? 
C28 C36 N5 C25 1.5(6) . . . . ? 
C35 C36 N5 C25 -179.5(4) . . . . ? 
C28 C36 N5 Cd1 173.7(3) . . . . ? 
C35 C36 N5 Cd1 -7.2(4) . . . . ? 
N1 Cd1 N5 C25 -86.7(3) . . . . ? 
N4 Cd1 N5 C25 84.8(3) . . . . ? 
N2 Cd1 N5 C25 -152.5(3) . . . . ? 
N3 Cd1 N5 C25 12.5(3) . . . . ? 
N6 Cd1 N5 C25 178.8(4) . . . . ? 
N1 Cd1 N5 C36 101.6(3) . . . . ? 
N4 Cd1 N5 C36 -87.0(3) . . . . ? 
N2 Cd1 N5 C36 35.8(5) . . . . ? 
N3 Cd1 N5 C36 -159.2(3) . . . . ? 
N6 Cd1 N5 C36 7.0(2) . . . . ? 
C33 C34 N6 C35 -1.1(6) . . . . ? 
C33 C34 N6 Cd1 177.4(3) . . . . ? 
C31 C35 N6 C34 1.7(5) . . . . ? 
C36 C35 N6 C34 -176.3(3) . . . . ? 
C31 C35 N6 Cd1 -177.0(3) . . . . ? 
C36 C35 N6 Cd1 5.1(4) . . . . ? 
N1 Cd1 N6 C34 77.7(3) . . . . ? 
N4 Cd1 N6 C34 -94.6(3) . . . . ? 
N2 Cd1 N6 C34 5.0(3) . . . . ? 
N3 Cd1 N6 C34 -145.3(3) . . . . ? 
N5 Cd1 N6 C34 175.2(3) . . . . ? 
N1 Cd1 N6 C35 -103.8(3) . . . . ? 
N4 Cd1 N6 C35 84.0(3) . . . . ? 
N2 Cd1 N6 C35 -176.5(3) . . . . ? 
N3 Cd1 N6 C35 33.2(4) . . . . ? 
N5 Cd1 N6 C35 -6.3(3) . . . . ? 
N7 C37 C38 C39 -0.1(8) . . . . ? 
C37 C38 C39 C40 -0.4(7) . . . . ? 
C38 C39 C40 C48 0.9(7) . . . . ? 
C38 C39 C40 C41 178.8(4) . . . . ? 
C39 C40 C41 C42 -178.8(4) . . . . ? 
C48 C40 C41 C42 -1.0(6) . . . . ? 
C40 C41 C42 C43 1.4(7) . . . . ? 
C41 C42 C43 C44 177.2(4) . . . . ? 
C41 C42 C43 C47 -1.3(6) . . . . ? 
C47 C43 C44 C45 1.6(6) . . . . ? 
C42 C43 C44 C45 -177.0(4) . . . . ? 
C43 C44 C45 C46 -0.9(6) . . . . ? 
C44 C45 C46 N8 -0.9(6) . . . . ? 
C44 C43 C47 N8 -0.6(6) . . . . ? 
C42 C43 C47 N8 178.1(4) . . . . ? 
C44 C43 C47 C48 -177.8(4) . . . . ? 
C42 C43 C47 C48 0.9(6) . . . . ? 
C39 C40 C48 N7 -1.1(6) . . . . ? 
C41 C40 C48 N7 -179.1(4) . . . . ? 
C39 C40 C48 C47 178.5(4) . . . . ? 
C41 C40 C48 C47 0.6(6) . . . . ? 
N8 C47 C48 N7 1.8(5) . . . . ? 
C43 C47 C48 N7 179.1(4) . . . . ? 
N8 C47 C48 C40 -177.8(4) . . . . ? 
C43 C47 C48 C40 -0.5(6) . . . . ? 
N9 C49 C50 C51 2.0(7) . . . . ? 
C49 C50 C51 C52 -0.7(6) . . . . ? 
C50 C51 C52 C60 -0.8(6) . . . . ? 
C50 C51 C52 C53 178.6(4) . . . . ? 
C51 C52 C53 C54 -178.3(4) . . . . ? 
C60 C52 C53 C54 1.1(6) . . . . ? 
C52 C53 C54 C55 -0.3(7) . . . . ? 
C53 C54 C55 C56 178.8(4) . . . . ? 
C53 C54 C55 C59 -1.8(6) . . . . ? 
C59 C55 C56 C57 2.7(6) . . . . ? 
C54 C55 C56 C57 -177.9(4) . . . . ? 
C55 C56 C57 C58 -3.1(6) . . . . ? 
C56 C57 C58 N10 0.7(7) . . . . ? 
C56 C55 C59 N10 0.0(6) . . . . ? 
C54 C55 C59 N10 -179.4(4) . . . . ? 
C56 C55 C59 C60 -177.6(3) . . . . ? 
C54 C55 C59 C60 3.0(5) . . . . ? 
C51 C52 C60 N9 1.3(6) . . . . ? 
C53 C52 C60 N9 -178.2(4) . . . . ? 
C51 C52 C60 C59 179.6(3) . . . . ? 
C53 C52 C60 C59 0.1(6) . . . . ? 
N10 C59 C60 N9 -1.5(5) . . . . ? 
C55 C59 C60 N9 176.2(3) . . . . ? 
N10 C59 C60 C52 -179.9(3) . . . . ? 
C55 C59 C60 C52 -2.2(5) . . . . ? 
N11 C61 C62 C63 0.9(7) . . . . ? 
C61 C62 C63 C64 -1.8(7) . . . . ? 
C62 C63 C64 C65 -179.9(4) . . . . ? 
C62 C63 C64 C72 -0.1(6) . . . . ? 
C63 C64 C65 C66 -179.4(5) . . . . ? 
C72 C64 C65 C66 0.7(7) . . . . ? 
C64 C65 C66 C67 -1.9(7) . . . . ? 
C65 C66 C67 C68 -177.0(5) . . . . ? 
C65 C66 C67 C71 1.1(7) . . . . ? 
C71 C67 C68 C69 -0.1(7) . . . . ? 
C66 C67 C68 C69 178.0(4) . . . . ? 
C67 C68 C69 C70 0.7(7) . . . . ? 
C68 C69 C70 N12 -0.7(7) . . . . ? 
C68 C67 C71 N12 -0.6(6) . . . . ? 
C66 C67 C71 N12 -178.8(4) . . . . ? 
C68 C67 C71 C72 179.1(4) . . . . ? 
C66 C67 C71 C72 0.8(6) . . . . ? 
C63 C64 C72 N11 3.0(6) . . . . ? 
C65 C64 C72 N11 -177.2(4) . . . . ? 
C63 C64 C72 C71 -178.7(4) . . . . ? 
C65 C64 C72 C71 1.2(6) . . . . ? 
N12 C71 C72 N11 -3.8(6) . . . . ? 
C67 C71 C72 N11 176.5(4) . . . . ? 
N12 C71 C72 C64 177.8(3) . . . . ? 
C67 C71 C72 C64 -1.9(6) . . . . ? 
C38 C37 N7 C48 -0.1(7) . . . . ? 
C38 C37 N7 Cd2 178.3(4) . . . . ? 
C40 C48 N7 C37 0.7(6) . . . . ? 
C47 C48 N7 C37 -179.0(4) . . . . ? 
C40 C48 N7 Cd2 -177.8(3) . . . . ? 
C47 C48 N7 Cd2 2.5(4) . . . . ? 
N11 Cd2 N7 C37 -17.8(4) . . . . ? 
N12 Cd2 N7 C37 -92.5(4) . . . . ? 
N9 Cd2 N7 C37 82.3(4) . . . . ? 
N10 Cd2 N7 C37 125.7(4) . . . . ? 
N8 Cd2 N7 C37 177.9(4) . . . . ? 
N11 Cd2 N7 C48 160.5(3) . . . . ? 
N12 Cd2 N7 C48 85.9(3) . . . . ? 
N9 Cd2 N7 C48 -99.3(3) . . . . ? 
N10 Cd2 N7 C48 -56.0(4) . . . . ? 
N8 Cd2 N7 C48 -3.7(3) . . . . ? 
C45 C46 N8 C47 1.9(6) . . . . ? 
C45 C46 N8 Cd2 -176.7(3) . . . . ? 
C43 C47 N8 C46 -1.2(6) . . . . ? 
C48 C47 N8 C46 176.1(3) . . . . ? 
C43 C47 N8 Cd2 177.6(3) . . . . ? 
C48 C47 N8 Cd2 -5.1(4) . . . . ? 
N11 Cd2 N8 C46 86.2(6) . . . . ? 
N7 Cd2 N8 C46 -176.7(4) . . . . ? 
N12 Cd2 N8 C46 82.8(3) . . . . ? 
N9 Cd2 N8 C46 -88.0(3) . . . . ? 
N10 Cd2 N8 C46 -16.3(3) . . . . ? 
N11 Cd2 N8 C47 -92.5(5) . . . . ? 
N7 Cd2 N8 C47 4.6(3) . . . . ? 
N12 Cd2 N8 C47 -95.8(3) . . . . ? 
N9 Cd2 N8 C47 93.3(3) . . . . ? 
N10 Cd2 N8 C47 165.1(3) . . . . ? 
C50 C49 N9 C60 -1.5(6) . . . . ? 
C50 C49 N9 Cd2 169.8(3) . . . . ? 
C52 C60 N9 C49 -0.2(5) . . . . ? 
C59 C60 N9 C49 -178.5(3) . . . . ? 
C52 C60 N9 Cd2 -172.5(3) . . . . ? 
C59 C60 N9 Cd2 9.2(4) . . . . ? 
N11 Cd2 N9 C49 91.7(3) . . . . ? 
N7 Cd2 N9 C49 -18.5(3) . . . . ? 
N12 Cd2 N9 C49 137.2(5) . . . . ? 
N10 Cd2 N9 C49 179.3(3) . . . . ? 
N8 Cd2 N9 C49 -89.8(3) . . . . ? 
N11 Cd2 N9 C60 -96.7(3) . . . . ? 
N7 Cd2 N9 C60 153.0(3) . . . . ? 
N12 Cd2 N9 C60 -51.2(6) . . . . ? 
N10 Cd2 N9 C60 -9.2(2) . . . . ? 
N8 Cd2 N9 C60 81.7(3) . . . . ? 
C57 C58 N10 C59 2.0(6) . . . . ? 
C57 C58 N10 Cd2 -175.5(3) . . . . ? 
C55 C59 N10 C58 -2.4(6) . . . . ? 
C60 C59 N10 C58 175.3(3) . . . . ? 
C55 C59 N10 Cd2 175.4(3) . . . . ? 
C60 C59 N10 Cd2 -7.0(4) . . . . ? 
N11 Cd2 N10 C58 -74.5(3) . . . . ? 
N7 Cd2 N10 C58 139.5(3) . . . . ? 
N12 Cd2 N10 C58 -2.5(3) . . . . ? 
N9 Cd2 N10 C58 -174.1(3) . . . . ? 
N8 Cd2 N10 C58 91.0(3) . . . . ? 
N11 Cd2 N10 C59 108.0(3) . . . . ? 
N7 Cd2 N10 C59 -38.0(4) . . . . ? 
N12 Cd2 N10 C59 179.9(3) . . . . ? 
N9 Cd2 N10 C59 8.4(2) . . . . ? 
N8 Cd2 N10 C59 -86.6(3) . . . . ? 
C62 C61 N11 C72 1.9(6) . . . . ? 
C62 C61 N11 Cd2 -179.8(3) . . . . ? 
C64 C72 N11 C61 -3.9(6) . . . . ? 
C71 C72 N11 C61 177.8(4) . . . . ? 
C64 C72 N11 Cd2 177.7(3) . . . . ? 
C71 C72 N11 Cd2 -0.7(5) . . . . ? 
N7 Cd2 N11 C61 89.1(3) . . . . ? 
N12 Cd2 N11 C61 -175.5(4) . . . . ? 
N9 Cd2 N11 C61 -4.9(3) . . . . ? 
N10 Cd2 N11 C61 -76.4(3) . . . . ? 
N8 Cd2 N11 C61 -179.1(4) . . . . ? 
N7 Cd2 N11 C72 -92.5(3) . . . . ? 
N12 Cd2 N11 C72 2.8(3) . . . . ? 
N9 Cd2 N11 C72 173.4(3) . . . . ? 
N10 Cd2 N11 C72 102.0(3) . . . . ? 
N8 Cd2 N11 C72 -0.7(6) . . . . ? 
C69 C70 N12 C71 0.0(6) . . . . ? 
C69 C70 N12 Cd2 174.1(3) . . . . ? 
C67 C71 N12 C70 0.7(6) . . . . ? 
C72 C71 N12 C70 -179.0(4) . . . . ? 
C67 C71 N12 Cd2 -174.1(3) . . . . ? 
C72 C71 N12 Cd2 6.2(4) . . . . ? 
N11 Cd2 N12 C70 -179.0(4) . . . . ? 
N7 Cd2 N12 C70 -71.4(4) . . . . ? 
N9 Cd2 N12 C70 133.3(5) . . . . ? 
N10 Cd2 N12 C70 93.2(4) . . . . ? 
N8 Cd2 N12 C70 0.1(4) . . . . ? 
N11 Cd2 N12 C71 -4.7(3) . . . . ? 
N7 Cd2 N12 C71 102.8(3) . . . . ? 
N9 Cd2 N12 C71 -52.5(6) . . . . ? 
N10 Cd2 N12 C71 -92.5(3) . . . . ? 
N8 Cd2 N12 C71 174.4(3) . . . . ? 
N13 C73 C74 C75 0.0(7) . . . . ? 
C82 C73 C74 C75 179.5(4) . . . . ? 
C73 C74 C75 C76 0.0(7) . . . . ? 
C74 C75 C76 C77 0.1(7) . . . . ? 
C75 C76 C77 N13 -0.2(6) . . . . ? 
C75 C76 C77 C78 179.7(4) . . . . ? 
N13 C77 C78 N15 100.1(4) . . . . ? 
C76 C77 C78 N15 -79.9(5) . . . . ? 
N15 C79 C80 C81 0.5(5) . . . . ? 
C79 C80 C81 N14 -1.0(5) . . . . ? 
N13 C73 C82 N17 -106.1(4) . . . . ? 
C74 C73 C82 N17 74.4(5) . . . . ? 
N17 C83 C84 C85 -0.8(7) . . . . ? 
C83 C84 C85 N16 0.7(8) . . . . ? 
C76 C77 N13 C73 0.3(6) . . . . ? 
C78 C77 N13 C73 -179.7(3) . . . . ? 
C74 C73 N13 C77 -0.2(6) . . . . ? 
C82 C73 N13 C77 -179.7(4) . . . . ? 
C80 C81 N14 N15 1.1(5) . . . . ? 
C80 C79 N15 N14 0.2(4) . . . . ? 
C80 C79 N15 C78 -178.8(4) . . . . ? 
C81 N14 N15 C79 -0.8(4) . . . . ? 
C81 N14 N15 C78 178.3(4) . . . . ? 
C77 C78 N15 C79 -76.6(5) . . . . ? 
C77 C78 N15 N14 104.5(4) . . . . ? 
C84 C85 N16 N17 -0.3(7) . . . . ? 
C85 N16 N17 C83 -0.2(6) . . . . ? 
C85 N16 N17 C82 179.8(4) . . . . ? 
C84 C83 N17 N16 0.7(7) . . . . ? 
C84 C83 N17 C82 -179.4(5) . . . . ? 
C73 C82 N17 N16 61.2(5) . . . . ? 
C73 C82 N17 C83 -118.8(5) . . . . ? 
 
loop_ 
 _geom_hbond_atom_site_label_D 
 _geom_hbond_atom_site_label_H 
 _geom_hbond_atom_site_label_A 
 _geom_hbond_distance_DH 
 _geom_hbond_distance_HA 
 _geom_hbond_distance_DA 
 _geom_hbond_angle_DHA 
 _geom_hbond_site_symmetry_A 
O1 H1A O2  0.86(3) 2.02(3) 2.870(6) 171(6) . 
O1 H1B F42B  0.86(3) 2.23(3) 3.021(18) 154(5) 2_565 
O1 H1B F43A  0.86(3) 2.26(4) 3.032(9) 150(5) 2_565 
O1 H1B F43A  0.86(3) 2.26(4) 3.032(9) 150(5) 2_565 
O2 H2A N14  0.86(3) 2.03(3) 2.885(5) 172(4) . 
O2 H2B F32A  0.86(3) 1.99(3) 2.836(8) 167(7) 2_565 
O2 H2B F33B  0.86(3) 2.28(4) 3.117(17) 165(6) 2_565 
O3 H3A N16  0.87(3) 2.01(3) 2.870(6) 170(6) . 
O3 H3B F23  0.87(3) 1.96(4) 2.802(4) 163(5) . 
O4 H4A O3  0.88(3) 2.02(4) 2.844(5) 155(5) . 
O4 H4B N13  0.87(3) 2.08(4) 2.925(5) 165(5) . 
O5 H5A F12  0.983(19) 1.91(2) 2.888(5) 173(5) . 
O5 H5B O2  0.97(2) 1.93(2) 2.875(5) 163(5) 2_564 
 
_diffrn_measured_fraction_theta_max    0.999 
_diffrn_reflns_theta_full              25.10 
_diffrn_measured_fraction_theta_full   0.999 
_refine_diff_density_max    0.691 
_refine_diff_density_min   -0.382 
_refine_diff_density_rms    0.061 

#===END
